# Supplementary material for: In Vitro Biological Activity of Natural Products from the Endophytic Fungus Paraboeremia selaginellae against Toxoplasma gondii
Source: MDPI journal article supplement (doi:10.3390/antibiotics11091176), 2022-08-31
Supplement: s1 [file s1]

---

*Supplementary Materials:*

|                                                                                           |    |
|-------------------------------------------------------------------------------------------|----|
| Figure S1. <sup>1</sup> H-NMR spectrum (DMSO-d <sub>6</sub> – 600 MHz) of Compound A..... | 4  |
| Figure S2. COSY NMR spectrum (DMSO-d <sub>6</sub> – 600 MHz) of compound A.....           | 5  |
| Figure S3. HMBC NMR spectrum (DMSO-d <sub>6</sub> – 600 MHz) of compound A.....           | 6  |
| Figure S4. HSQC NMR spectrum (DMSO-d <sub>6</sub> – 600 MHz) of compound A.....           | 7  |
| Figure S5. NOESY NMR spectrum (DMSO-d <sub>6</sub> – 600 MHz) of compound A.....          | 8  |
| Figure S6. <sup>1</sup> H NMR spectrum (CDCl <sub>3</sub> ·600 MHz) of compound B.....    | 9  |
| Figure S7. COSY NMR spectrum (CDCl <sub>3</sub> ·600 MHz) of compound B.....              | 10 |
| Figure S8. HMBC NMR spectrum (CDCl <sub>3</sub> ·600 MHz) of compound B.....              | 11 |
| Figure S9. NOESY NMR spectrum (CDCl <sub>3</sub> ·600 MHz) of compound B.....             | 12 |
| Figure S10. <sup>1</sup> H NMR spectrum (CDCl <sub>3</sub> ·600 MHz) of compound C.....   | 13 |
| Figure S11. COSY NMR spectrum (CDCl <sub>3</sub> ·600 MHz) of compound C.....             | 14 |
| Figure S12. HMBC NMR spectrum (CDCl <sub>3</sub> ·600 MHz) of compound C.....             | 15 |
| Figure S13. NOESY NMR spectrum (CDCl <sub>3</sub> ·600 MHz) of compound C.....            | 16 |
| Figure S14. <sup>1</sup> H NMR spectrum (CDCl <sub>3</sub> ·600 MHz) of compound D.....   | 17 |
| Figure S15. <sup>13</sup> C NMR spectrum (CDCl <sub>3</sub> ·150 MHz) of compound D.....  | 18 |
| Figure S16. COSY NMR spectrum (CDCl <sub>3</sub> ·600 MHz) of compound D.....             | 19 |
| Figure S17. HSQC NMR spectrum (CDCl <sub>3</sub> ·600 MHz) of compound D.....             | 20 |
| Figure S18. HMBC NMR spectrum (CDCl <sub>3</sub> ·600 MHz) of compound D.....             | 21 |
| Figure S19. <sup>1</sup> H NMR spectrum (CDCl <sub>3</sub> ·600 MHz) of compound E.....   | 22 |
| Figure S20. <sup>13</sup> C NMR spectrum (CDCl <sub>3</sub> ·150 MHz) of compound E.....  | 23 |
| Figure S21. COSY NMR spectrum (CDCl <sub>3</sub> ·600 MHz) of compound E.....             | 24 |
| Figure S22. HSQC NMR spectrum (CDCl <sub>3</sub> ·600 MHz) of compound E.....             | 25 |
| Figure S23. HMBC NMR spectrum (CDCl <sub>3</sub> ·600 MHz) of compound E.....             | 26 |
| Figure S24. <sup>1</sup> H NMR spectrum (CDCl <sub>3</sub> ·600 MHz) of compound F.....   | 27 |

---

---

|                                                                                            |    |
|--------------------------------------------------------------------------------------------|----|
| Figure S25. $^{13}\text{C}$ NMR spectrum ( $\text{CDCl}_3$ - 150 MHz) of compound F.....   | 28 |
| Figure S26. COSY NMR spectrum ( $\text{CDCl}_3$ - 600 MHz) of compound F.....              | 29 |
| Figure S27. HSQC NMR spectrum ( $\text{CDCl}_3$ - 600 MHz) of compound F.....              | 30 |
| Figure S28. HMBC NMR spectrum ( $\text{CDCl}_3$ - 600 MHz) of compound F.....              | 31 |
| Figure S29. $^1\text{H}$ NMR spectrum ( $\text{DMSO-d}_6$ - 600 MHz) of compound G.....    | 32 |
| Figure S30. $^{13}\text{C}$ NMR spectrum ( $\text{DMSO-d}_6$ - 150 MHz) of compound G..... | 33 |
| Figure S31. COSY NMR spectrum ( $\text{DMSO-d}_6$ - 600 MHz) of compound G.....            | 34 |
| Figure S32. HSQC NMR spectrum ( $\text{DMSO-d}_6$ - 600 MHz) of compound G.....            | 35 |
| Figure S33. HMBC NMR spectrum ( $\text{DMSO-d}_6$ - 600 MHz) of compound G.....            | 36 |
| Figure S34. $^1\text{H}$ NMR spectrum ( $\text{CDCl}_3$ - 600 MHz) of compound H.....      | 37 |
| Figure S35. HRESIMS (MeOH) of compound A.....                                              | 38 |
| Figure S36. HRESIMS (MeOH) of compound B.....                                              | 39 |
| Figure S37. HRESIMS (MeOH) of compound C.....                                              | 40 |
| Figure S38. HRESIMS (MeOH) of compound D.....                                              | 41 |
| Figure S39. HRESIMS (MeOH) of compound E.....                                              | 42 |
| Figure S40. HRESIMS (MeOH) of compound F.....                                              | 43 |
| Figure S41. HRESIMS (MeOH) of compound G.....                                              | 44 |
| Figure S42. HRESIMS (MeOH) of compound H.....                                              | 45 |
| Figure S43. HPLC chromatogram (MeOH) of compound A.....                                    | 46 |
| Figure S44. UV-Vis spectrum (MeOH) of compound A.....                                      | 46 |
| Figure S45. HPLC chromatogram (MeOH) of compound B.....                                    | 47 |
| Figure S46. UV-Vis spectrum (MeOH) of compound B.....                                      | 47 |
| Figure S47. HPLC chromatogram (MeOH) of compound C.....                                    | 48 |
| Figure S48. UV-Vis spectrum (MeOH) of compound C.....                                      | 48 |
| Figure S49. HPLC chromatogram (MeOH) of compound D.....                                    | 49 |
| Figure S50. UV-Vis spectrum (MeOH) of compound D.....                                      | 49 |
| Figure S51. HPLC chromatogram of (MeOH) compound E.....                                    | 50 |
| Figure S52. UV-Vis spectrum (MeOH) of compound E.....                                      | 50 |

---

|                                                         |       |
|---------------------------------------------------------|-------|
| Figure S53. HPLC chromatogram (MeOH) of compound F..... | 51    |
| Figure S54. UV-Vis spectrum (MeOH) of compound F.....   | 51    |
| Figure S55. HPLC chromatogram (MeOH) of compound G..... | 52    |
| Figure S56. UV-Vis spectrum (MeOH) of compound G.....   | 52    |
| Figure S57- HPLC-chromatogram (MeOH) of compound H..... | 53    |
| Figure S58. UV-Vis spectrum (MeOH) of compound H.....   | 53    |
| Stereochemical Studies of compound F.....               | 54-58 |

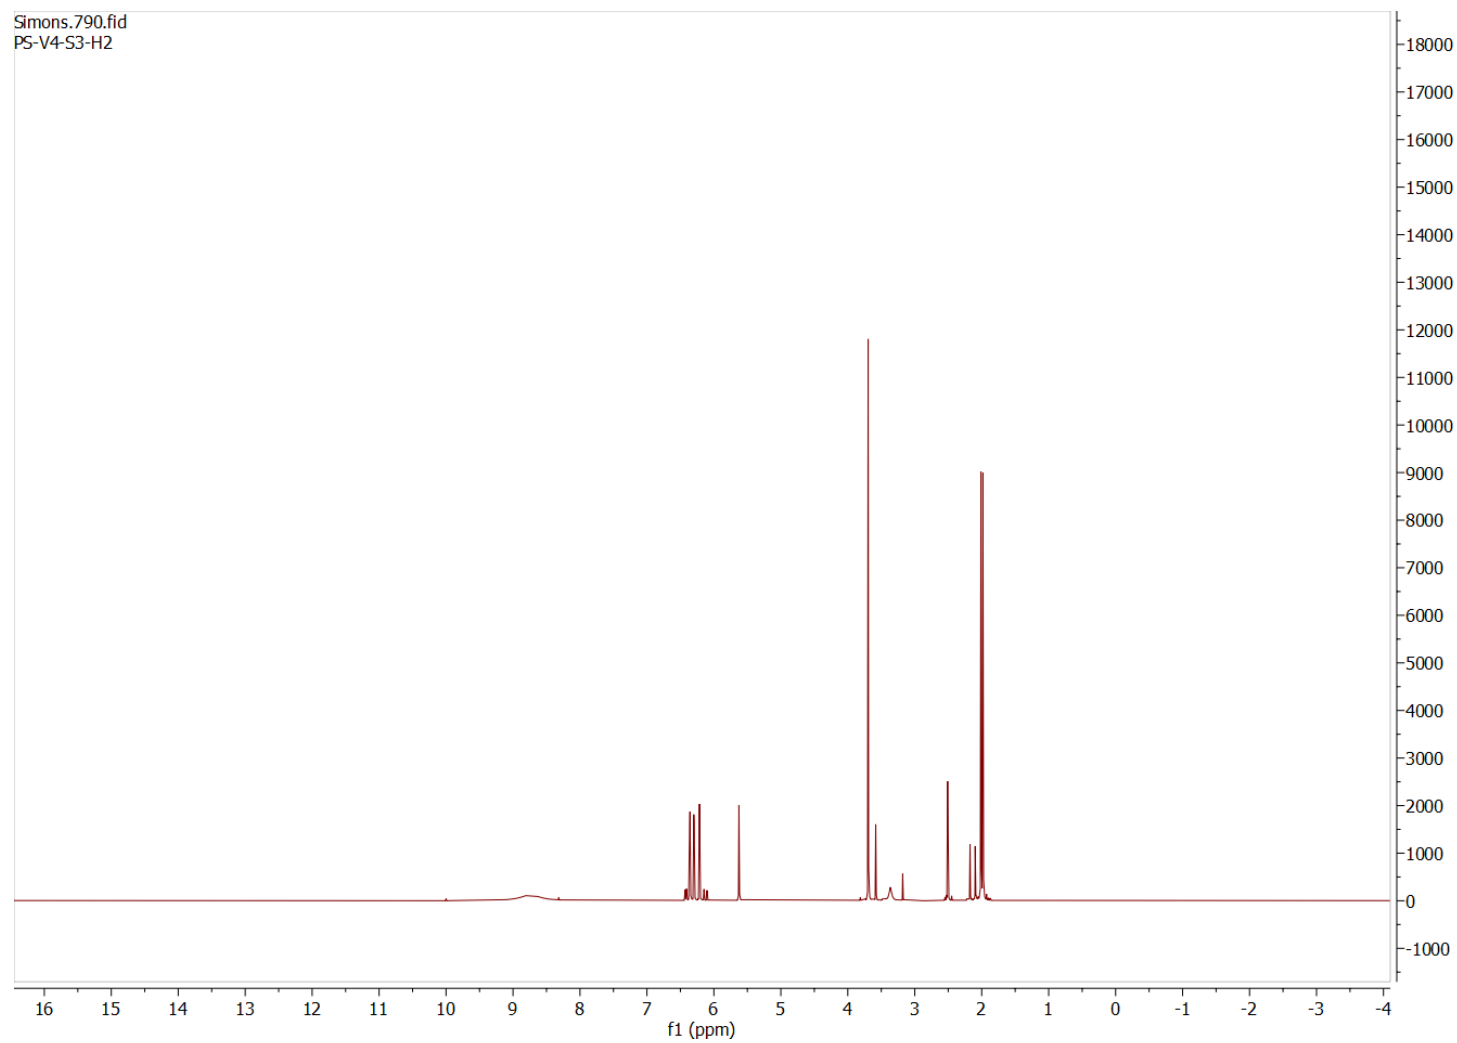

Figure S1.  $^1\text{H}$ -NMR spectrum (DMSO- $d_6$  – 600 MHz) of Compound A

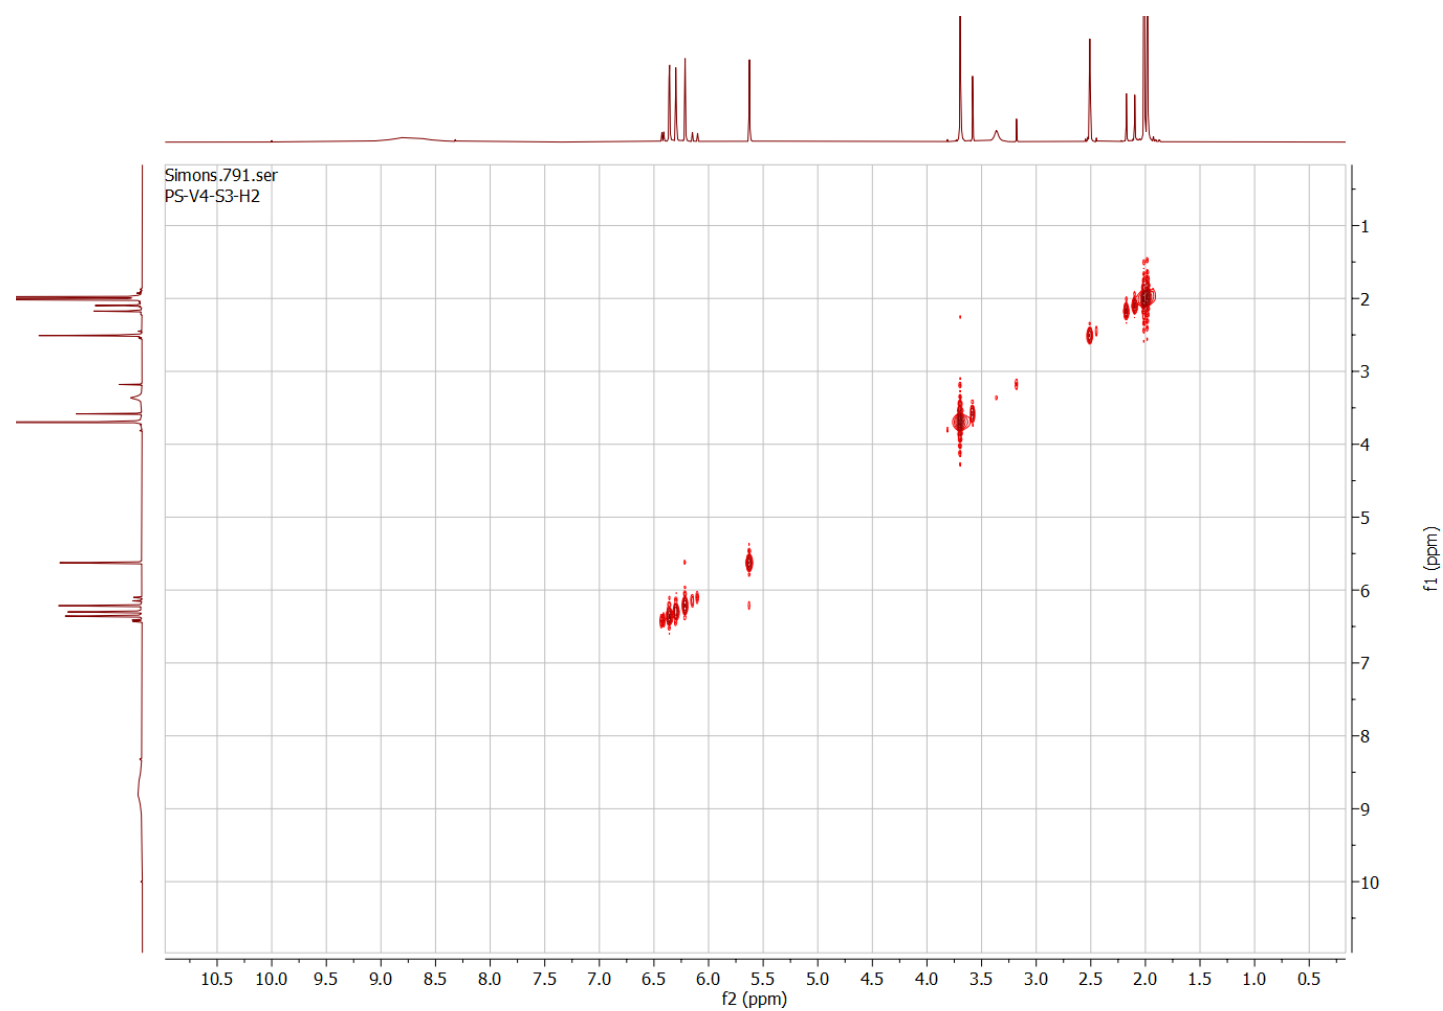

Figure S2. COSY NMR spectrum (DMSO-d<sub>6</sub> – 600 MHz) of compound A

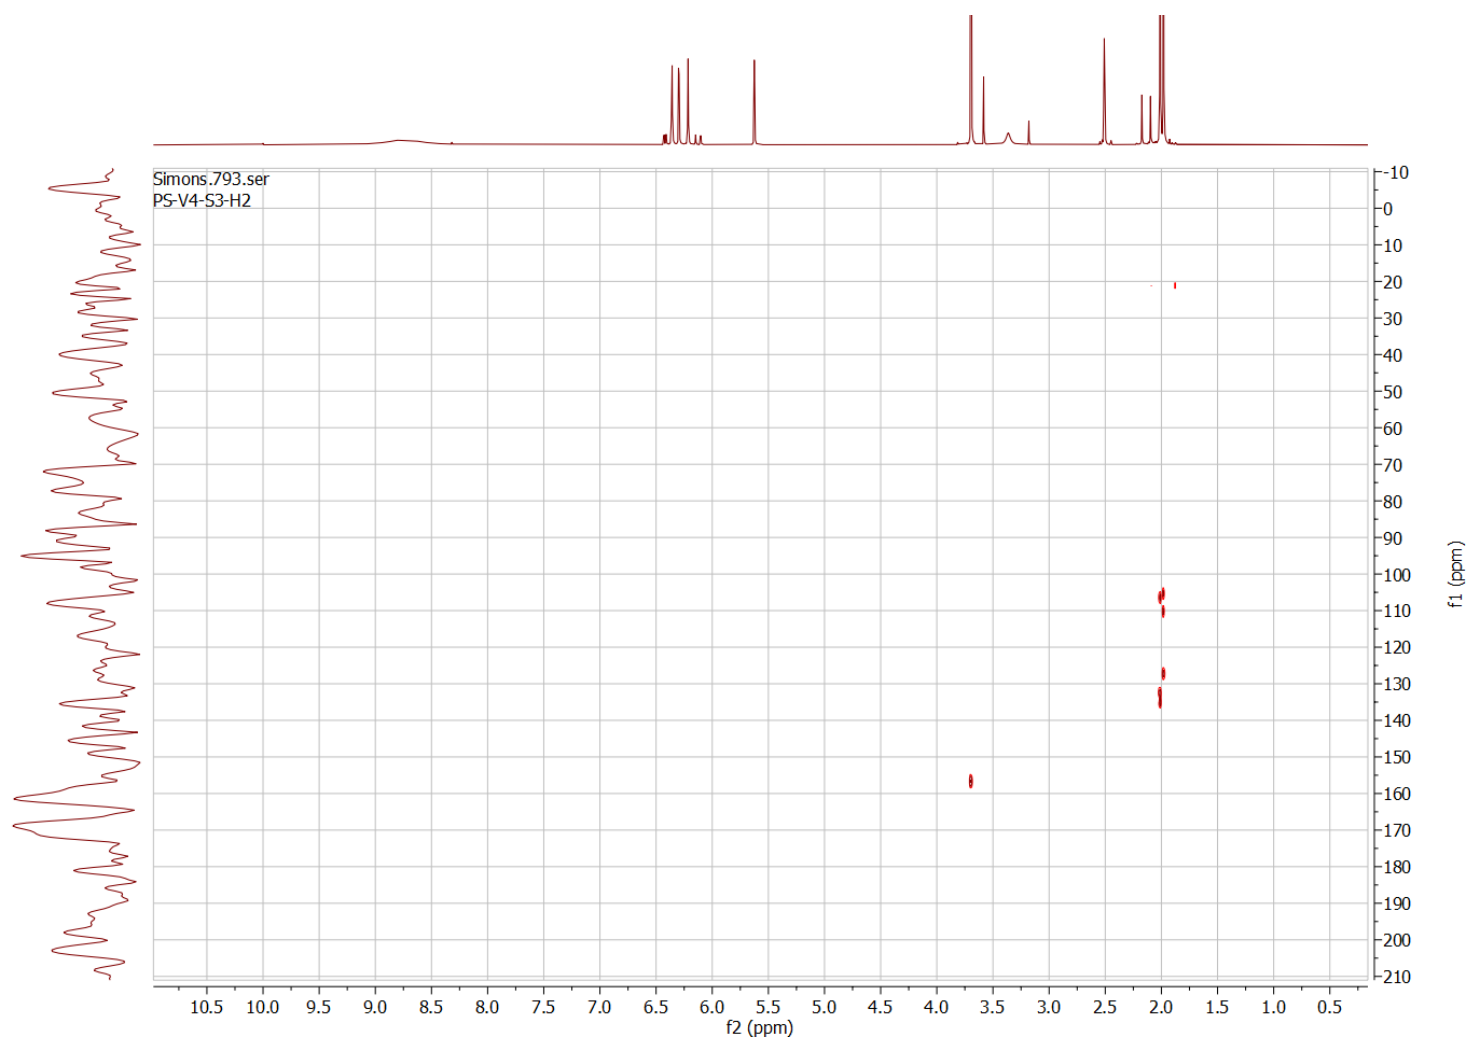

Figure S3. HMBC NMR spectrum (DMSO-d<sub>6</sub> – 600 MHz) of compound A

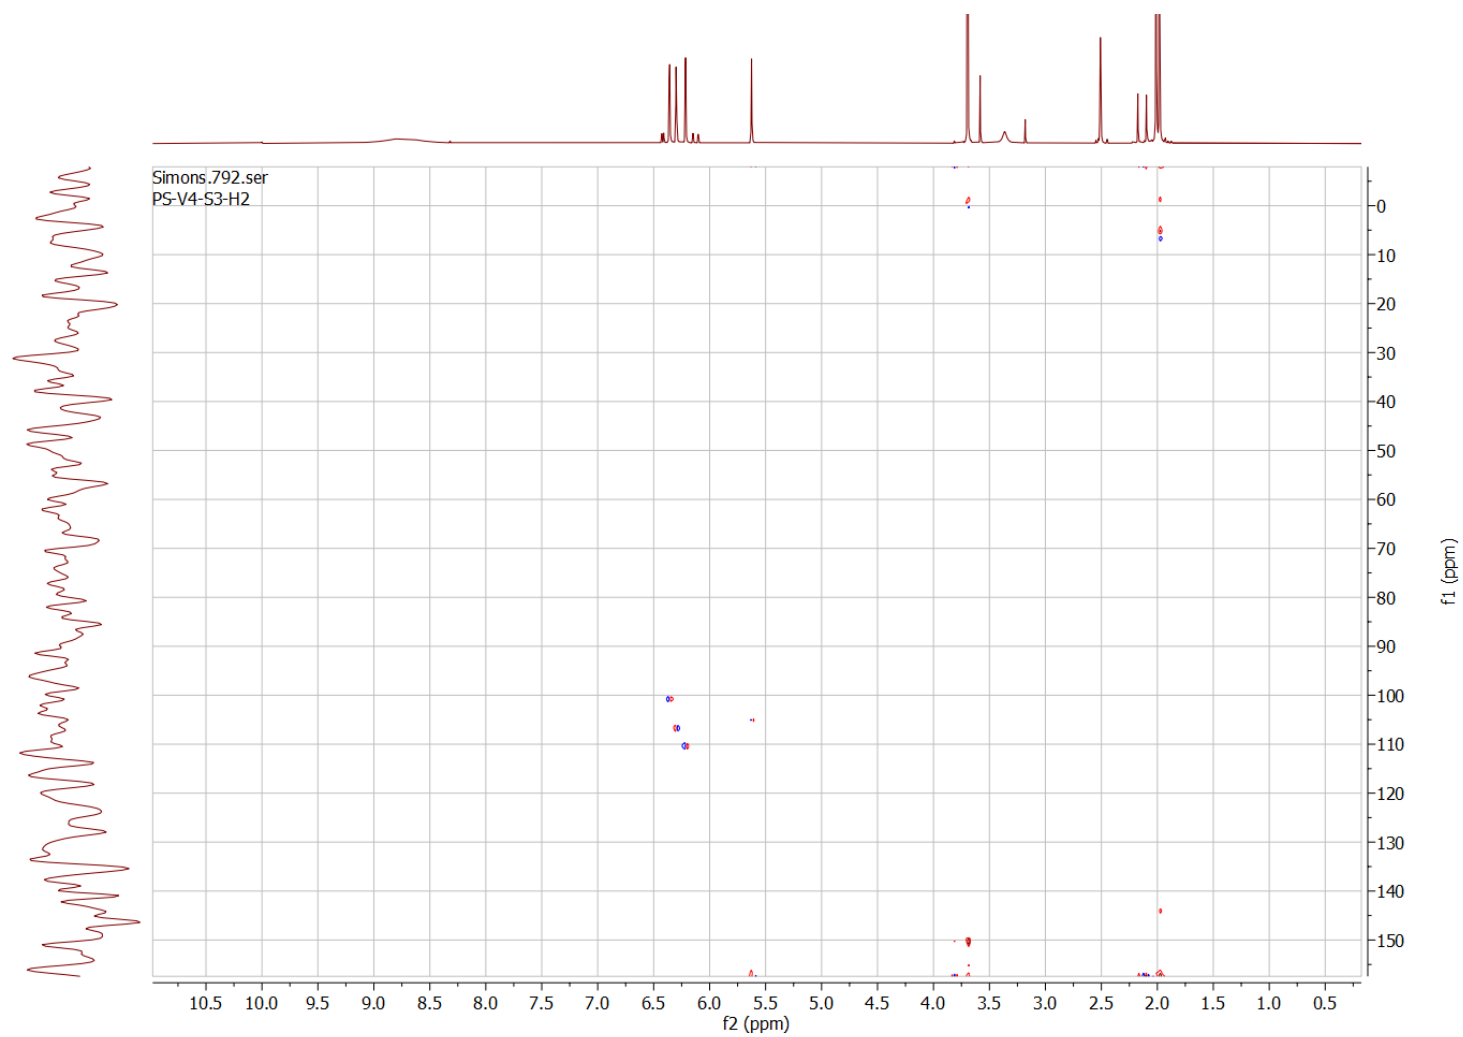

Figure S4. HSQC NMR spectrum (DMSO-d<sub>6</sub> – 600 MHz) of compound A

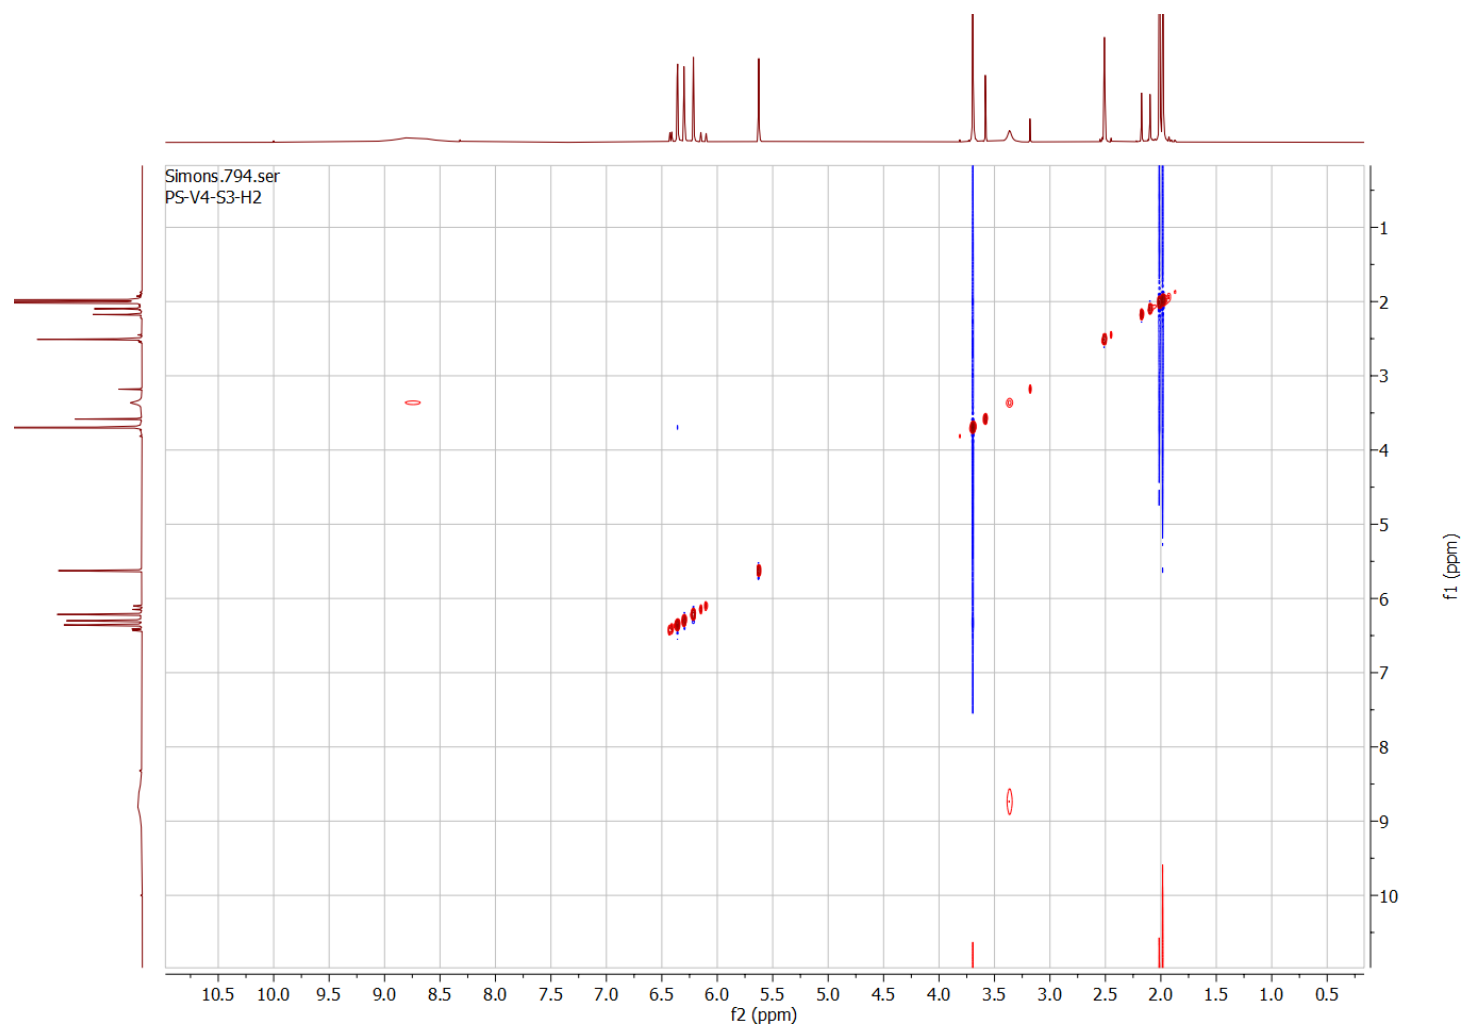

Figure S5. NOESY NMR spectrum (DMSO-d<sub>6</sub> – 600 MHz) of compound A



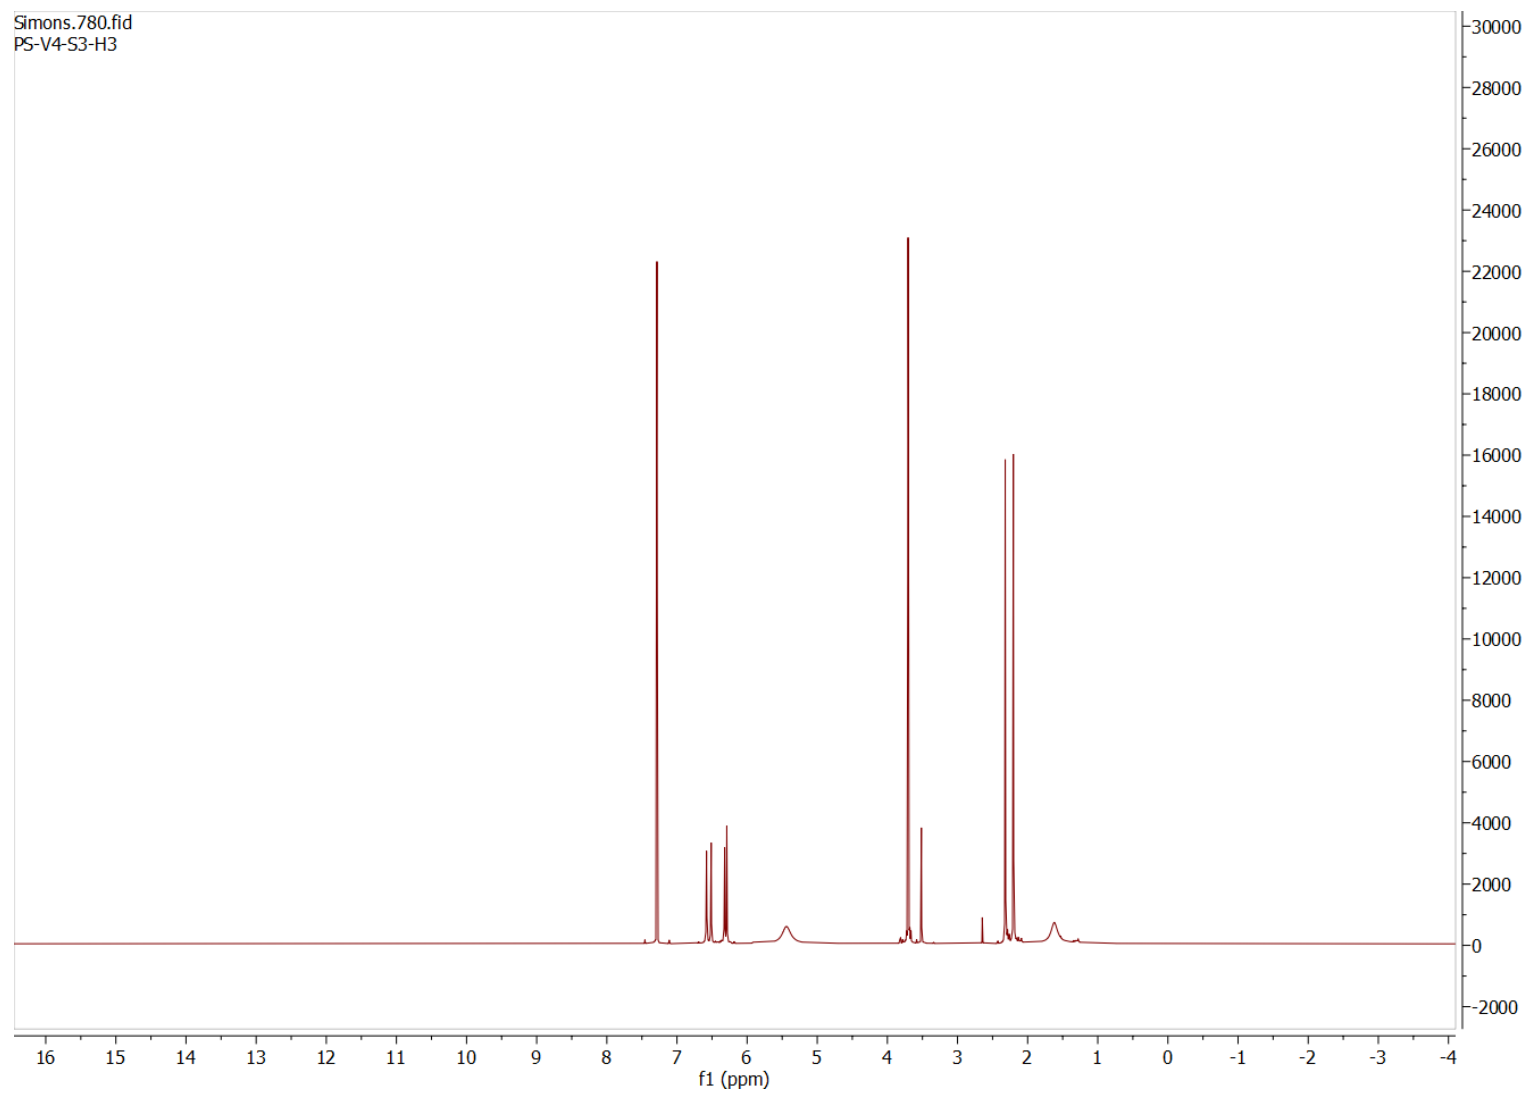

Figure S6.  $^1\text{H}$  NMR spectrum ( $\text{CDCl}_3$ , 600 MHz) of compound B

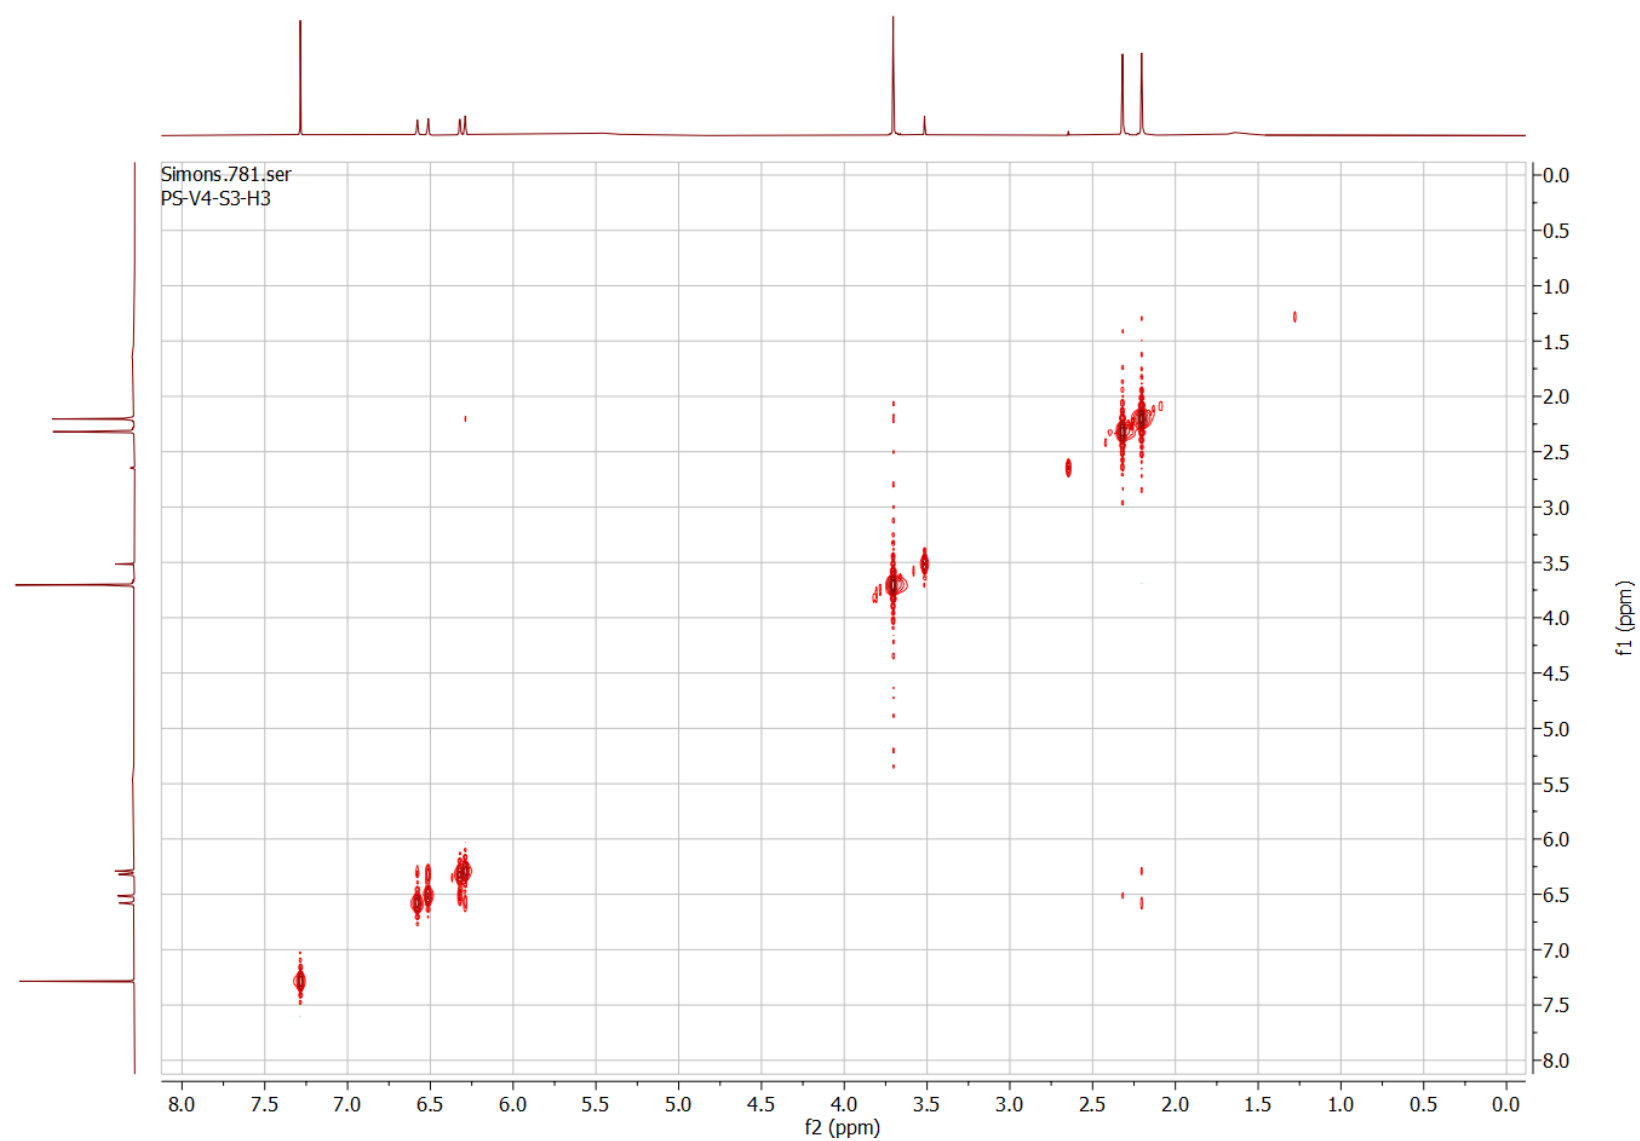

Figure S7. COSY NMR spectrum ( $\text{CDCl}_3$ , 600 MHz) of compound B

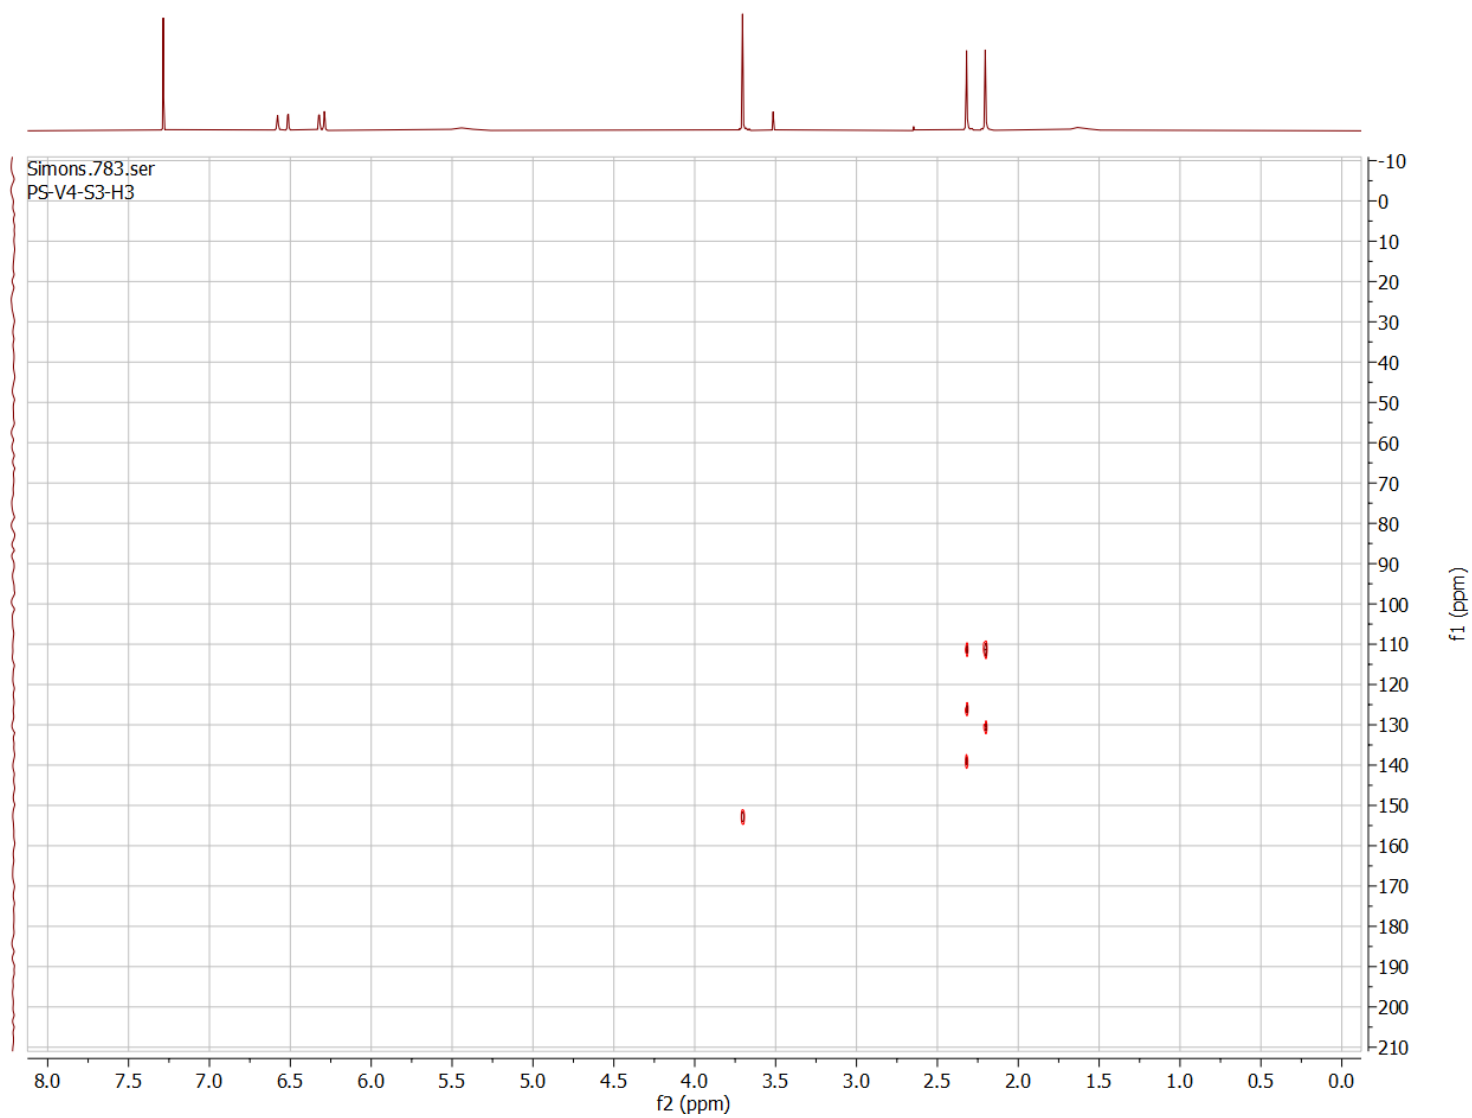

Figure S8. HMBC NMR spectrum ( $\text{CDCl}_3$ , 600 MHz) of compound B

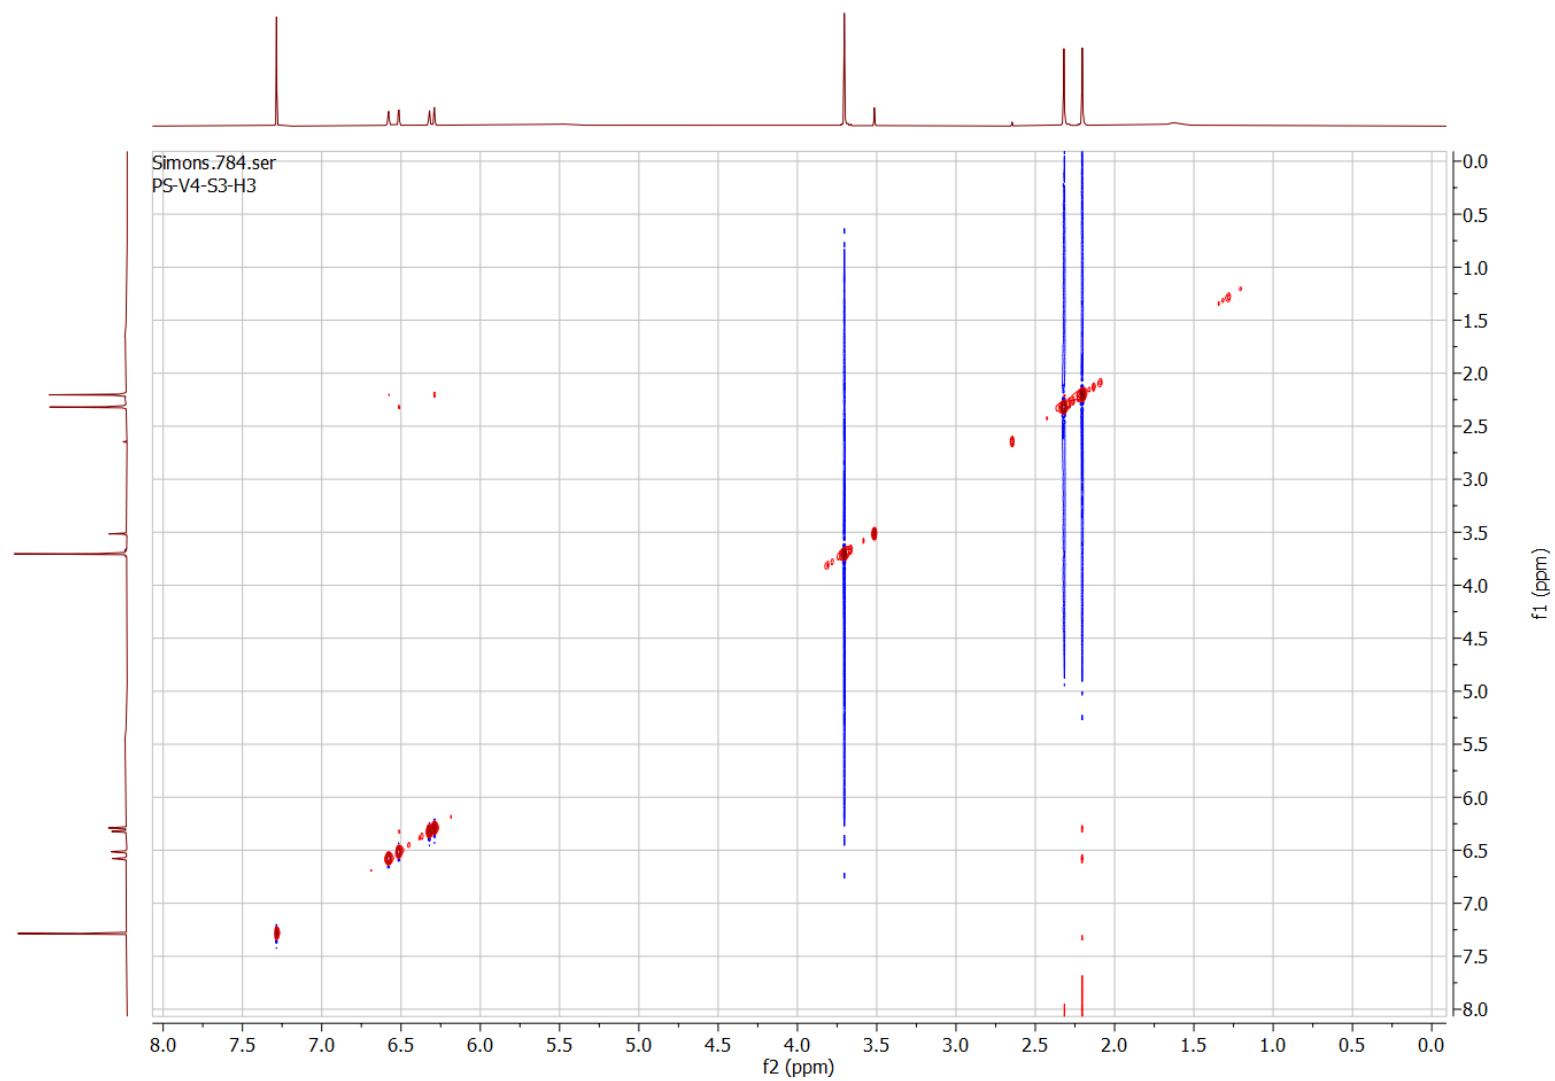

Figure S9. NOESY NMR spectrum ( $\text{CDCl}_3$  - 600 MHz) of compound B

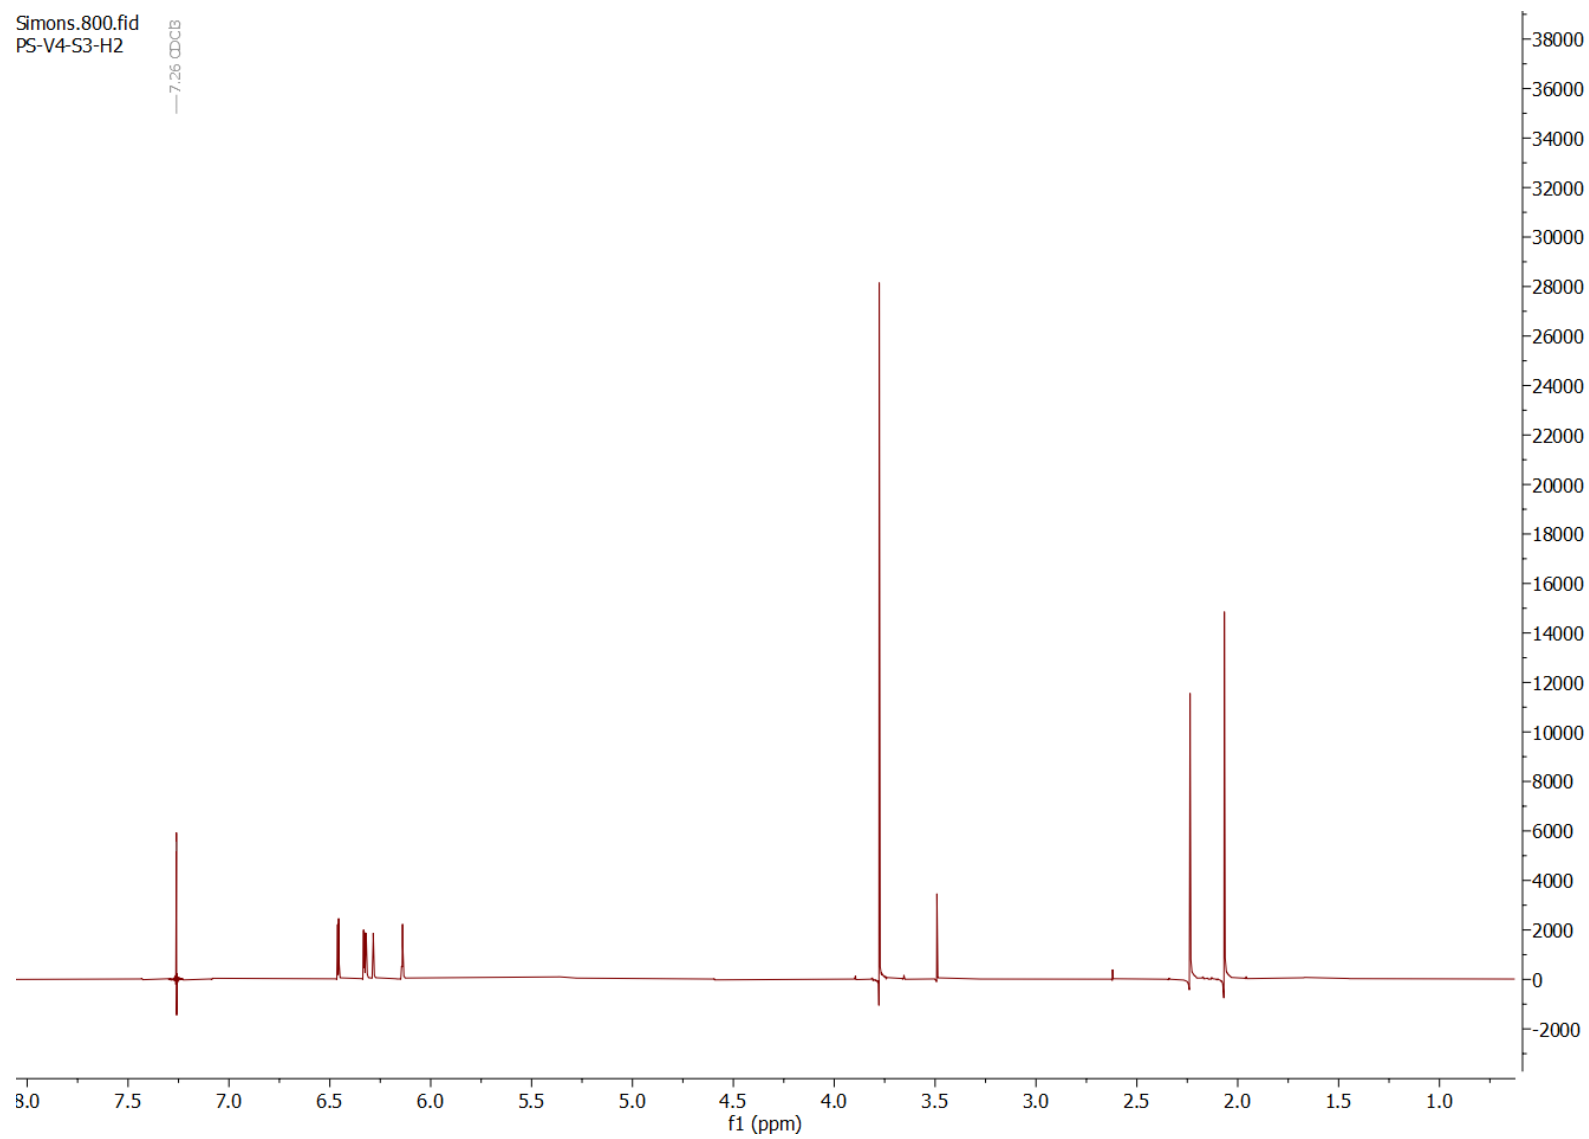

Figure S10. <sup>1</sup>H NMR spectrum (CDCl<sub>3</sub> - 600 MHz) of compound C

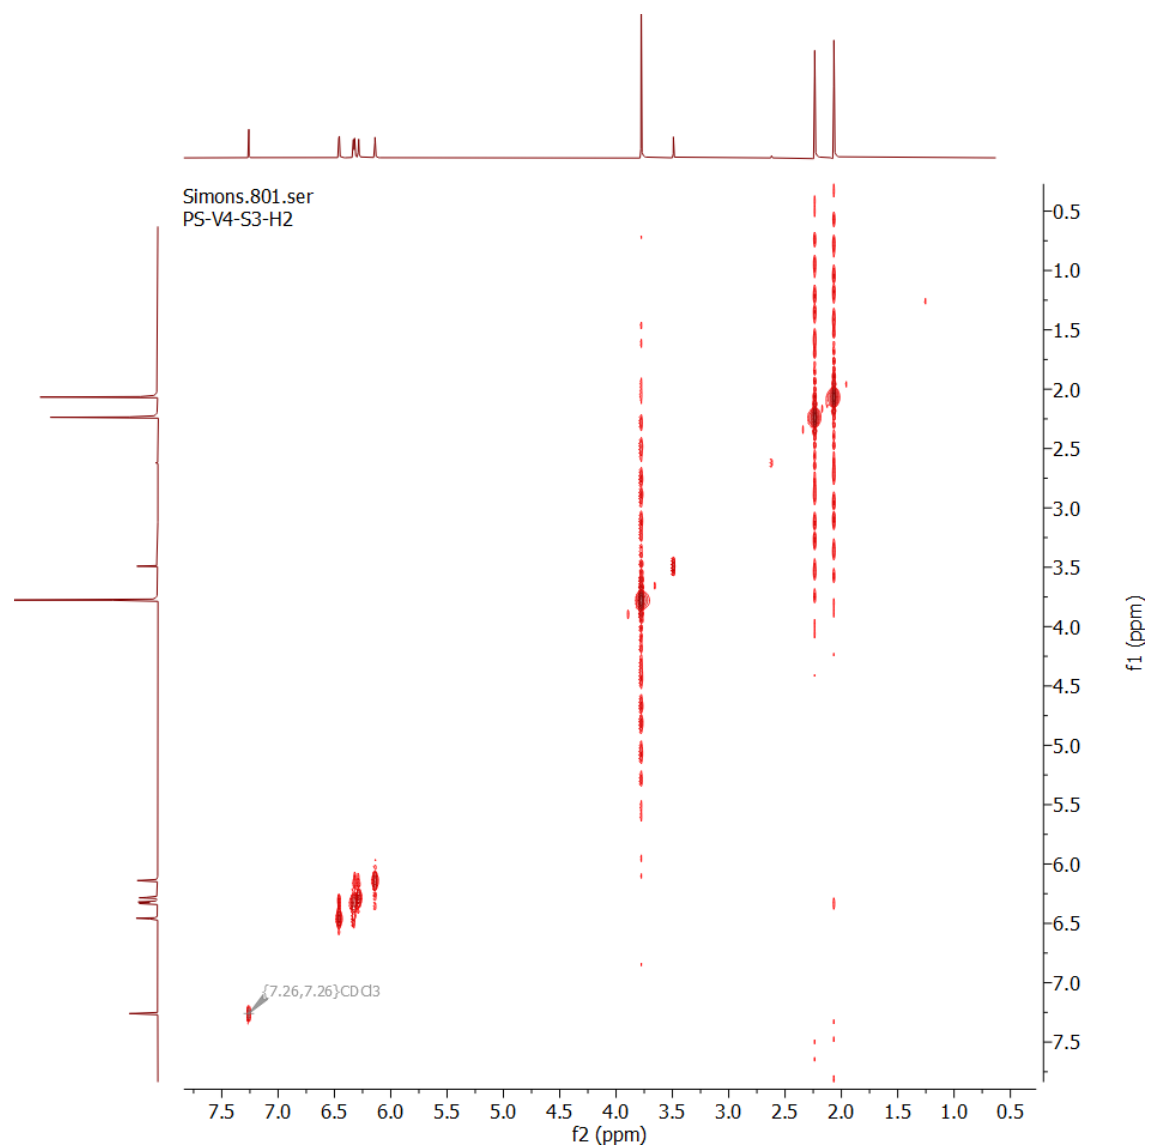

Figure S11. COSY NMR spectrum (CDCl<sub>3</sub>-600 MHz) of compound C

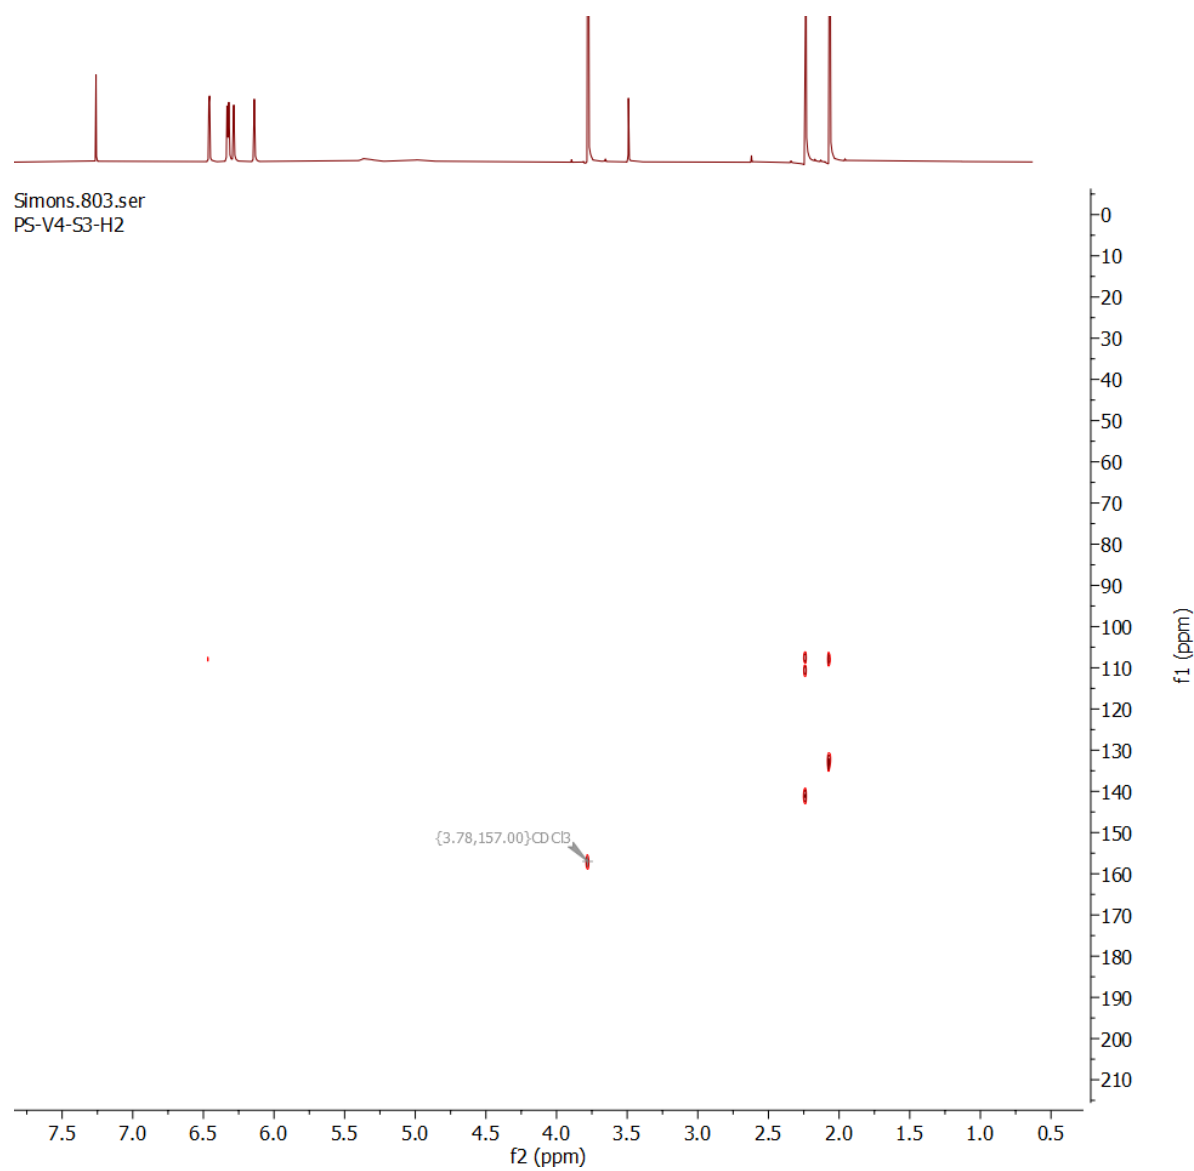

Figure S12. HMBC NMR spectrum ( $\text{CDCl}_3$  - 600 MHz) of compound C

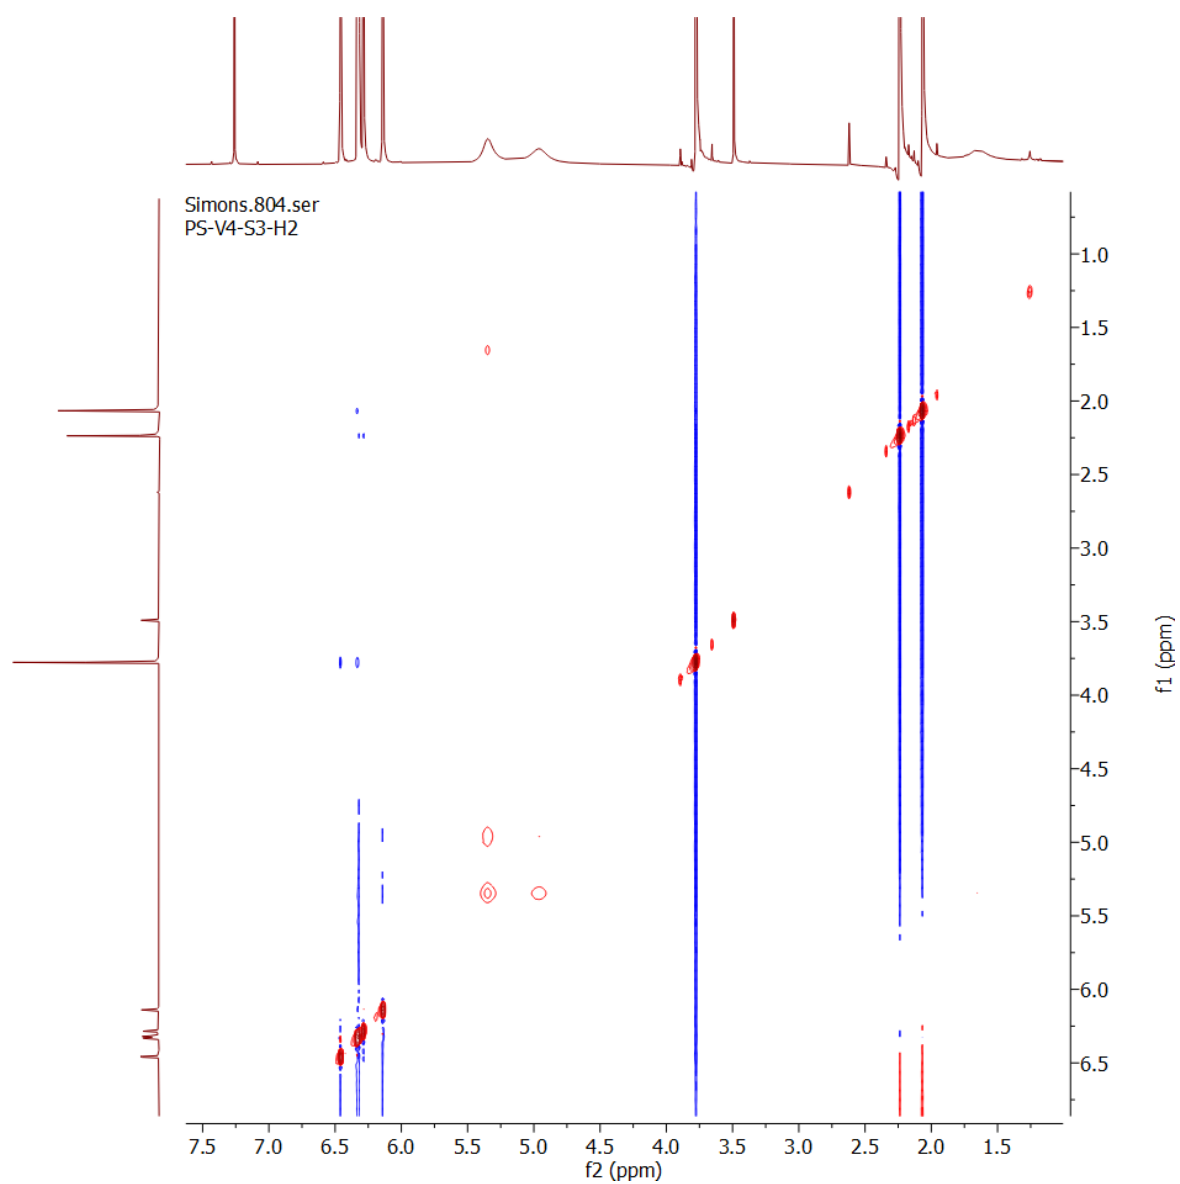

Figure S13. NOESY NMR spectrum ( $\text{CDCl}_3$ , 600 MHz) of compound C



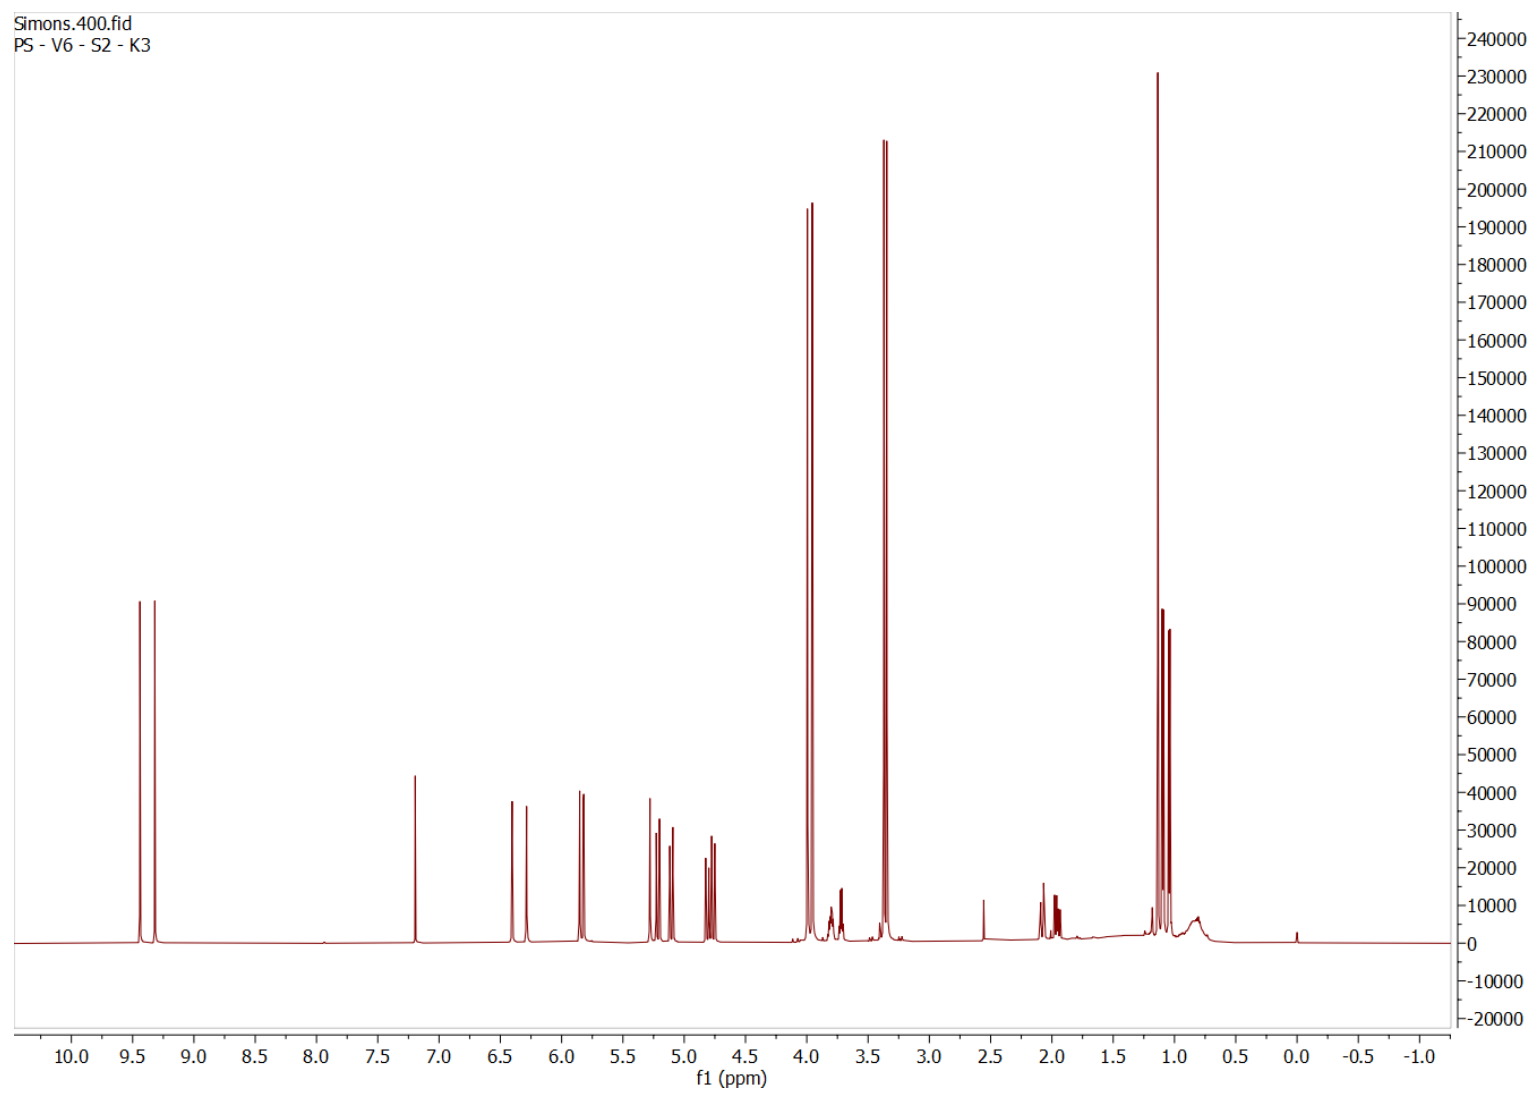

Figure S14.  $^1\text{H}$  NMR spectrum ( $\text{CDCl}_3$ , 600 MHz) of compound D

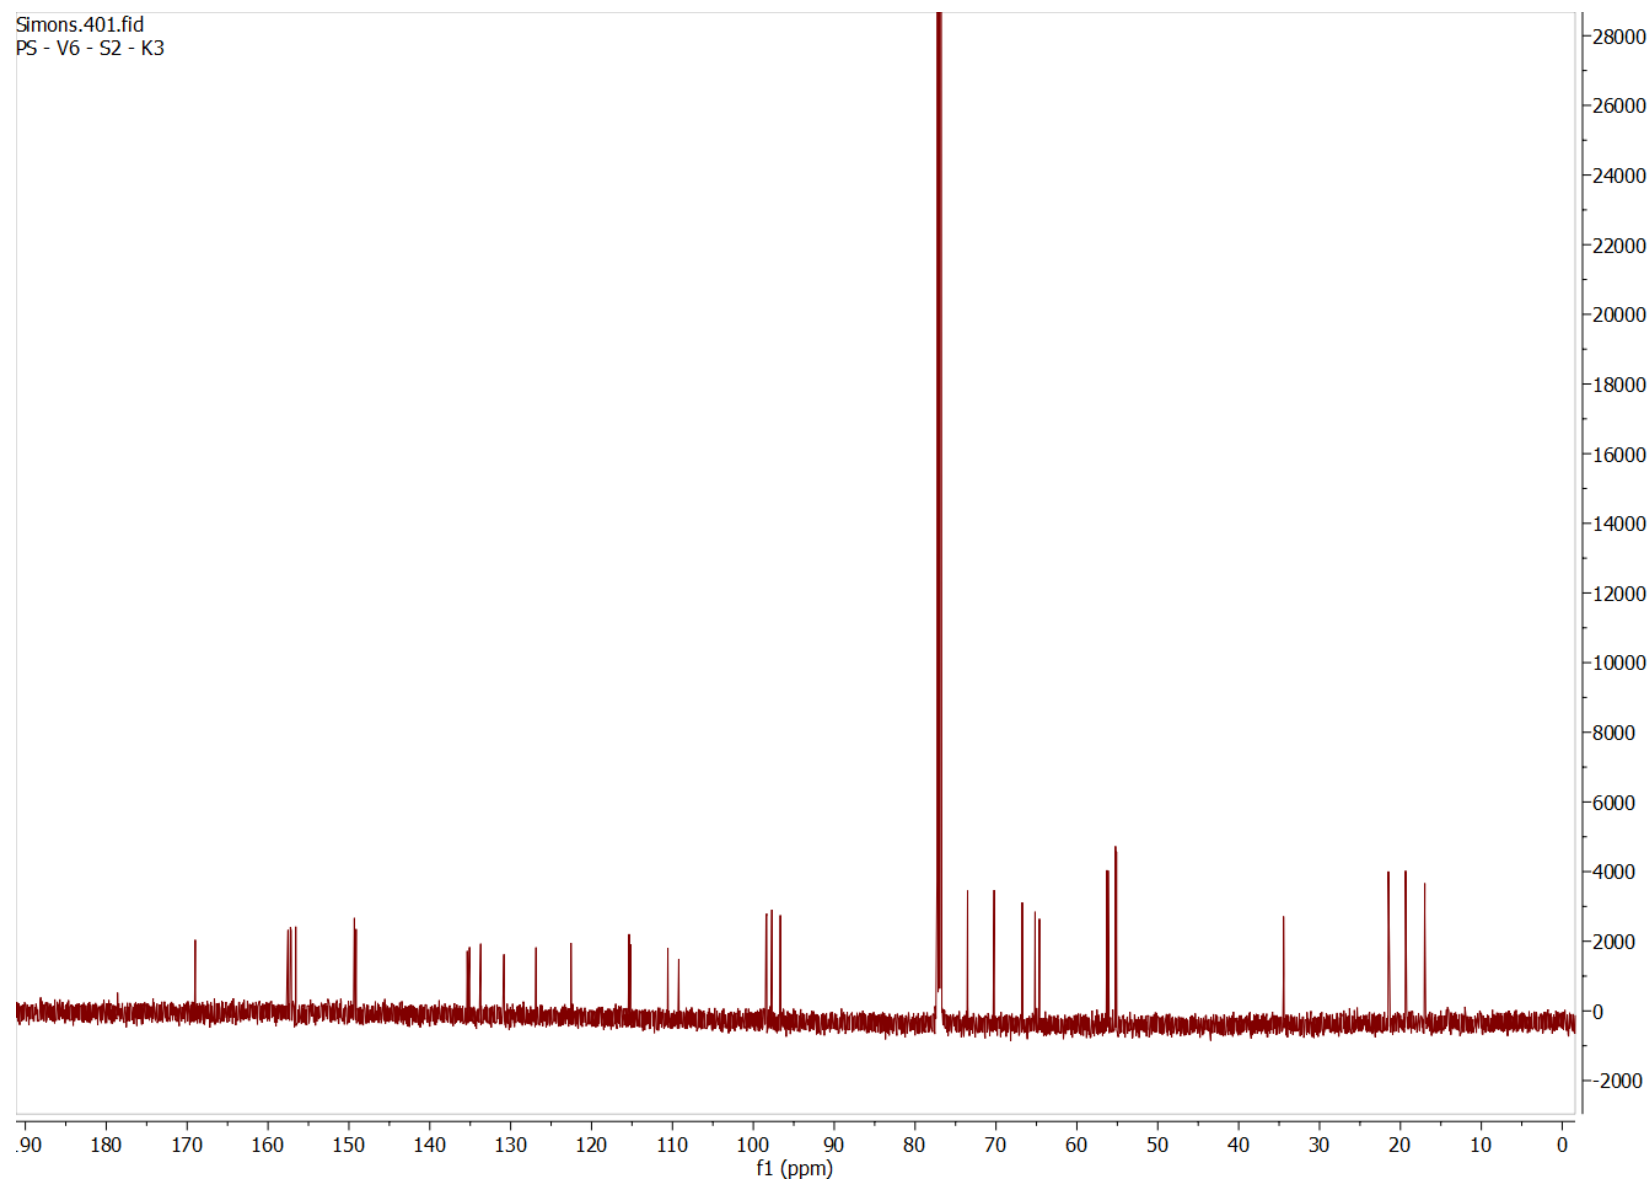

Figure S15.  $^{13}\text{C}$  NMR spectrum ( $\text{CDCl}_3$  - 150 MHz) of compound D

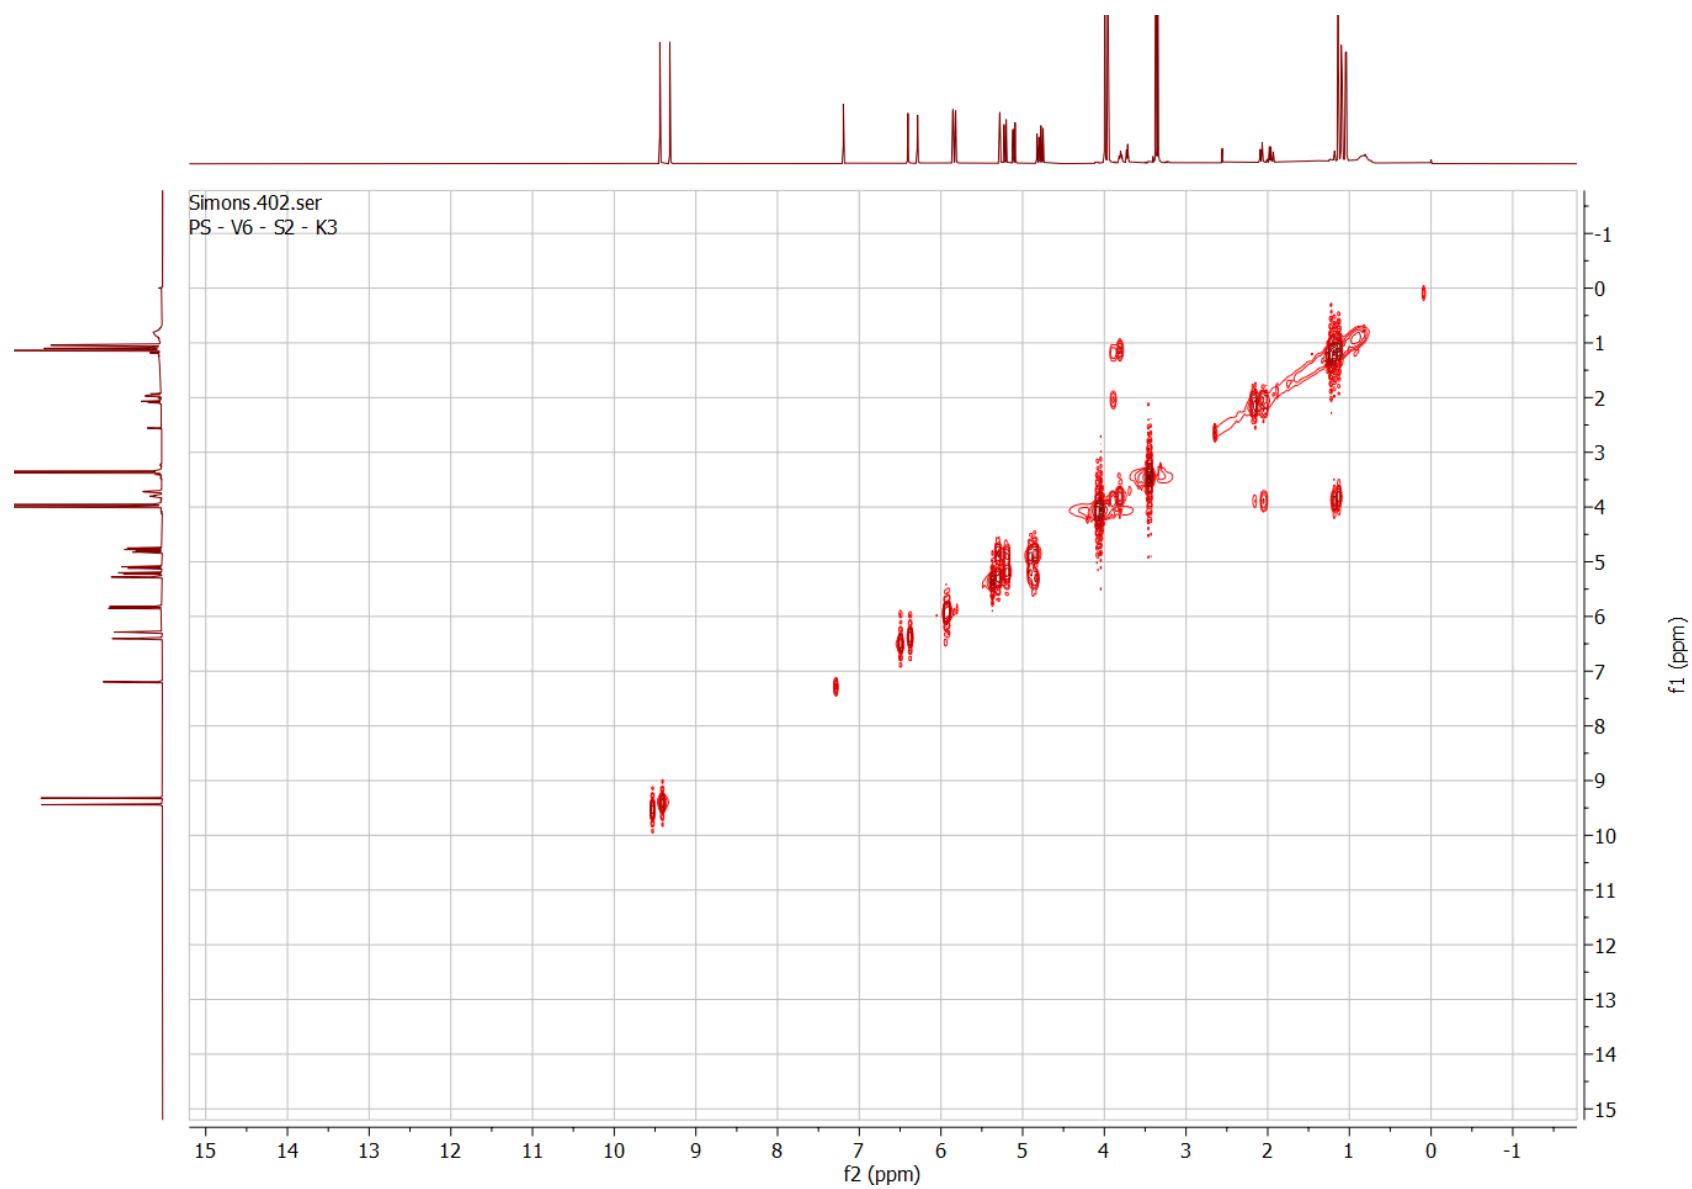

Figure S16. COSY NMR spectrum ( $\text{CDCl}_3$ , 600 MHz) of compound D

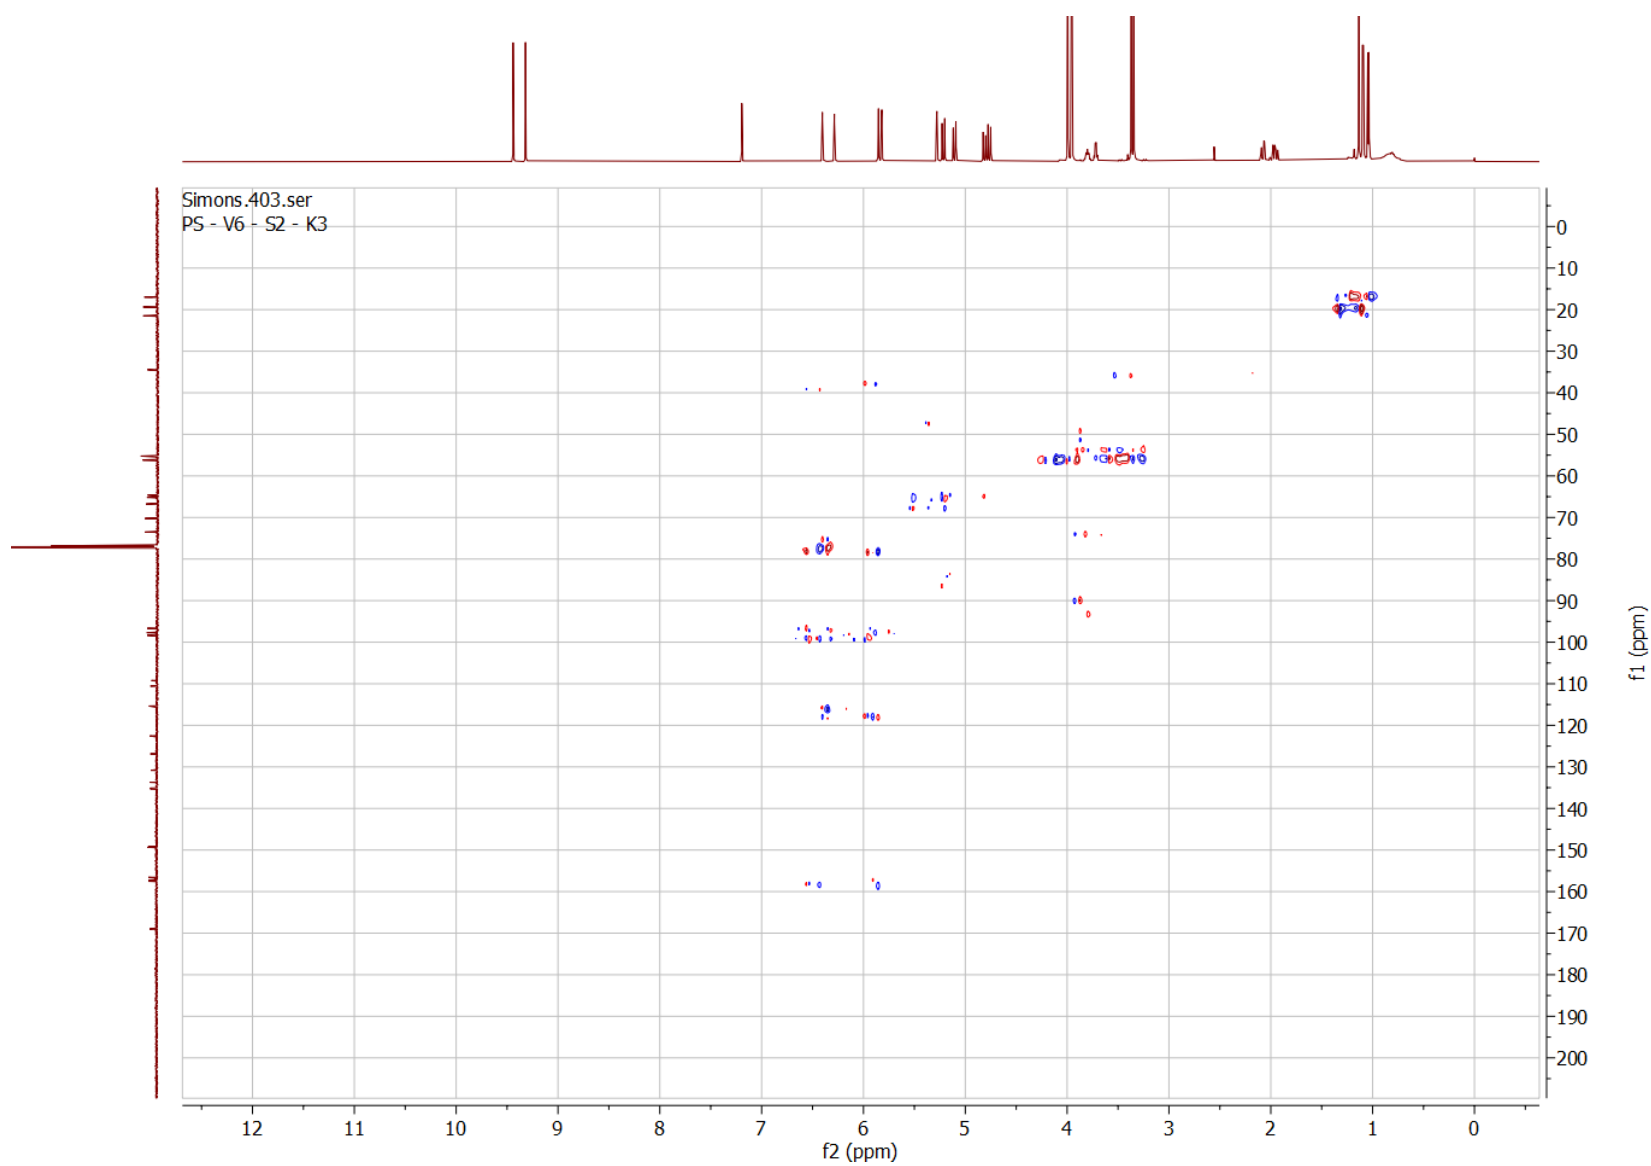

Figure S17. HSQC NMR spectrum ( $\text{CDCl}_3$ , 600 MHz) of compound D

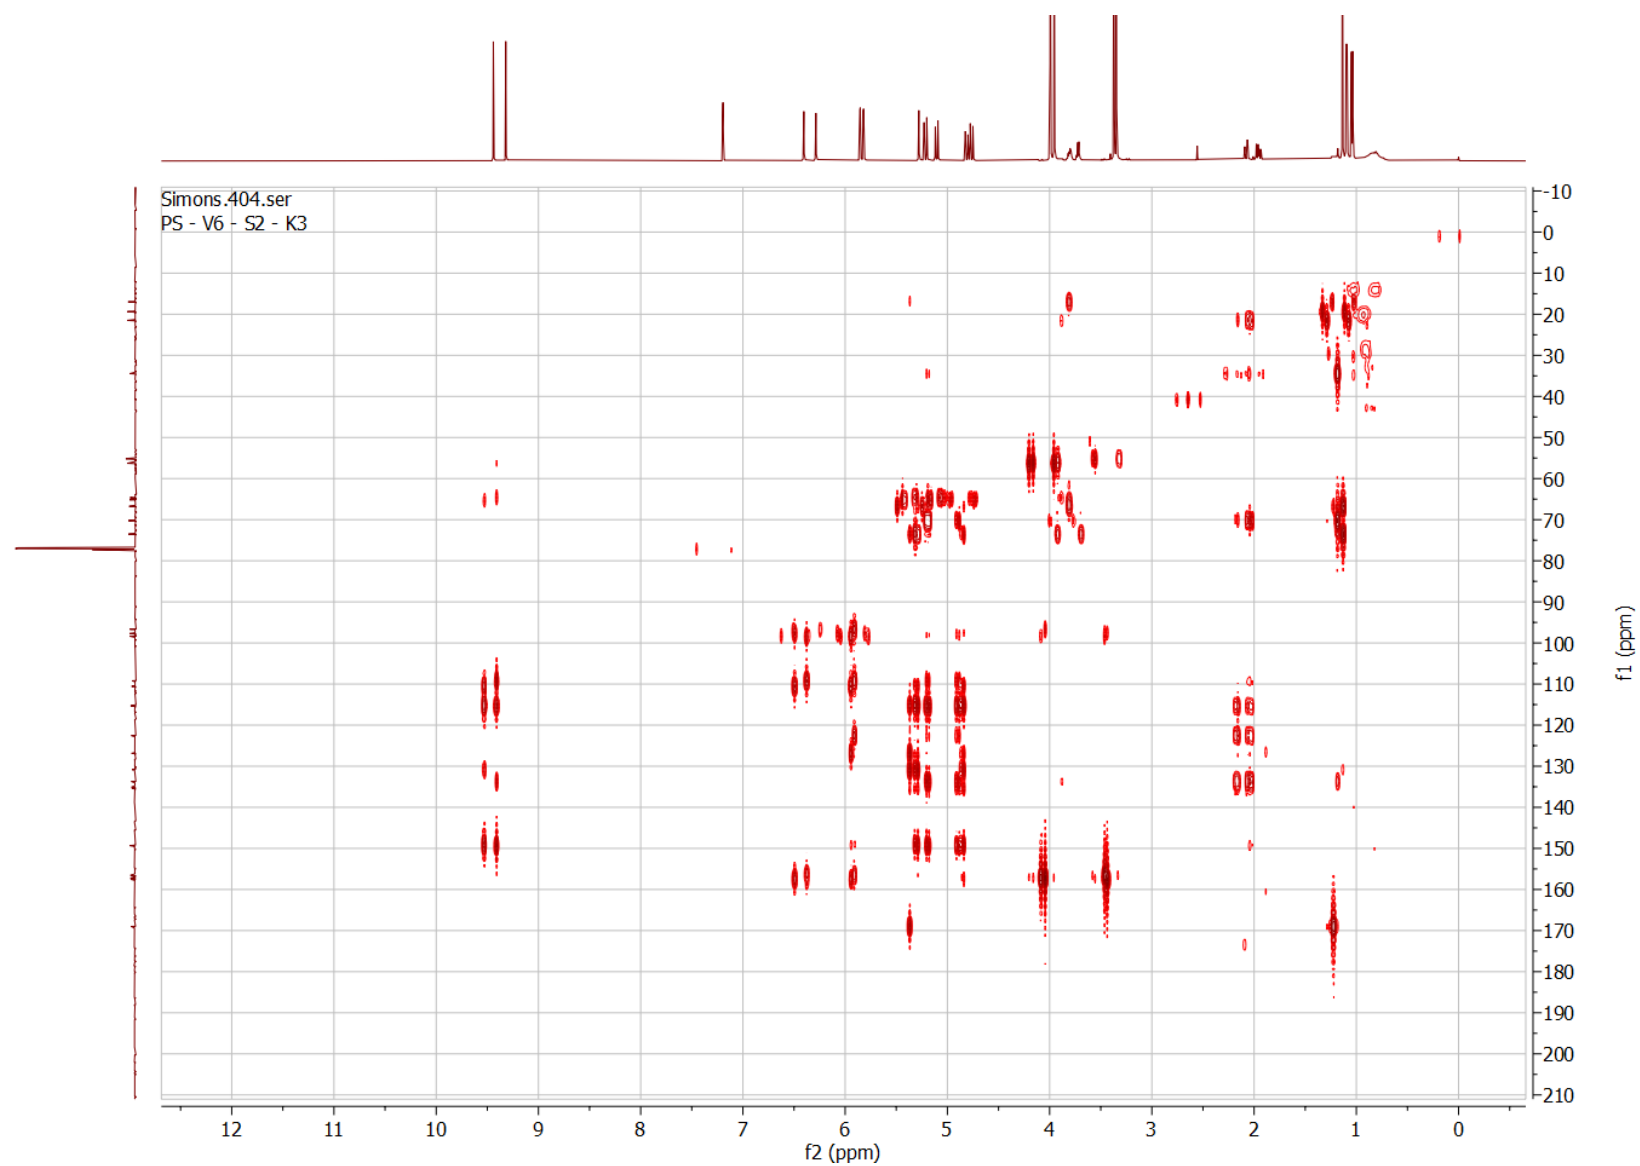

Figure S18. HMBC NMR spectrum ( $\text{CDCl}_3$  - 600 MHz) of compound D

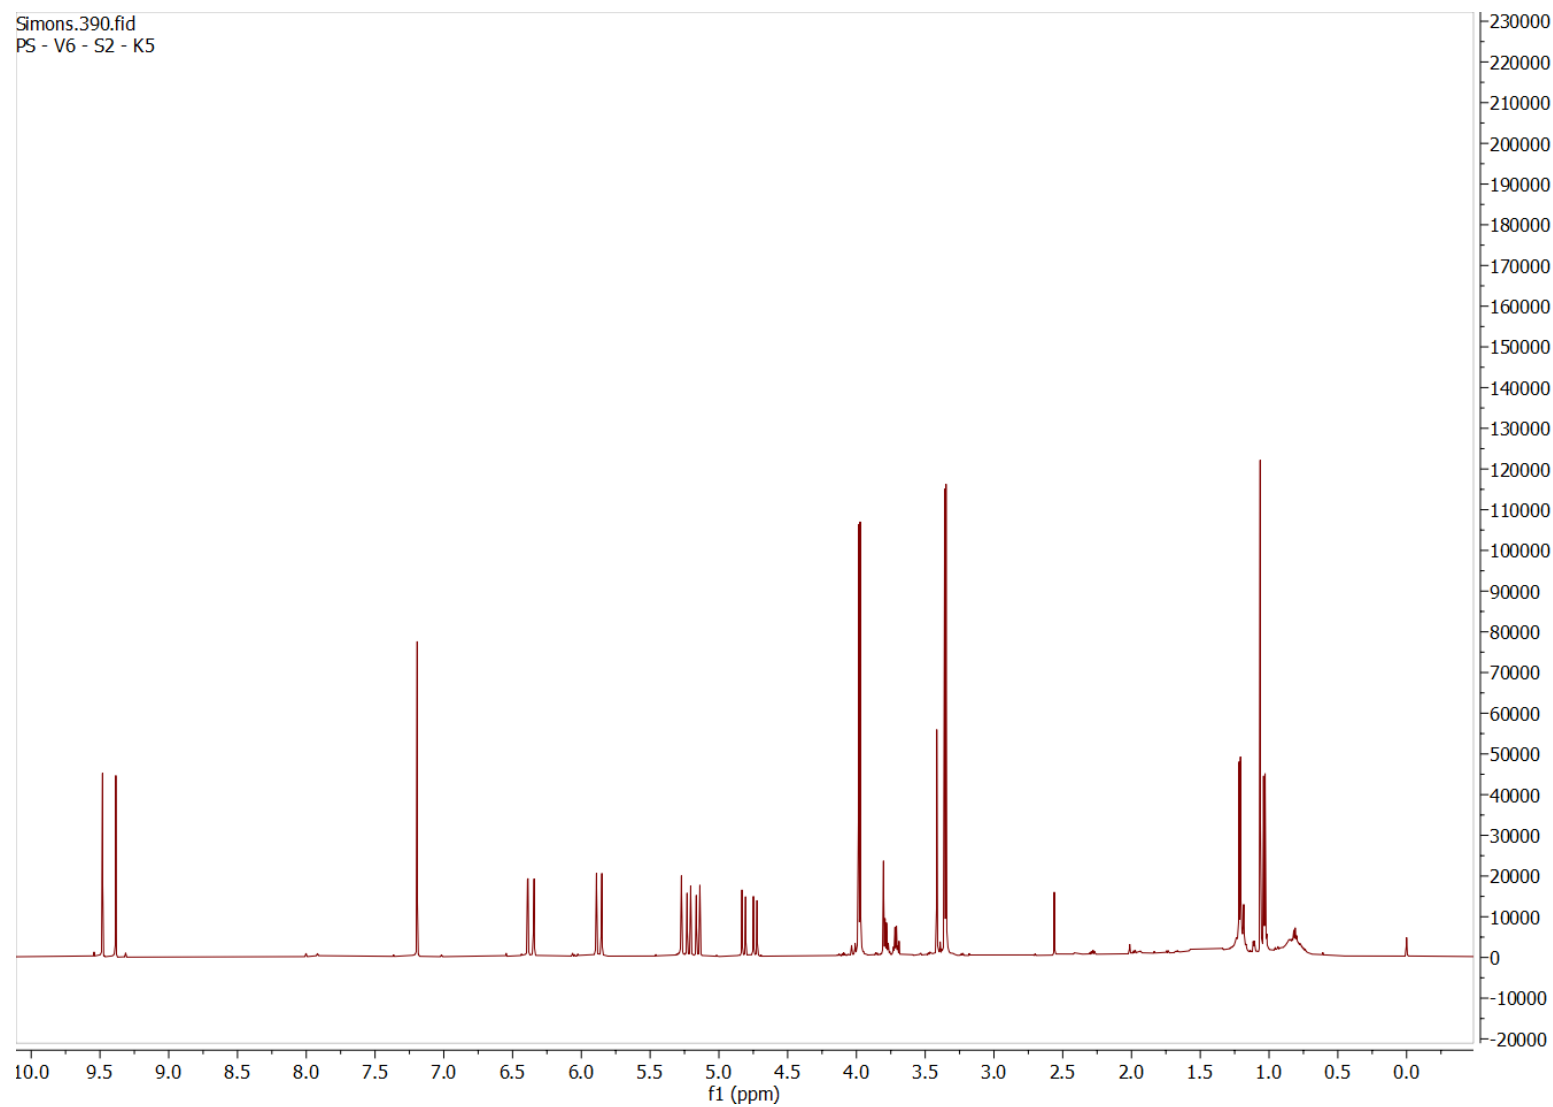

Figure S19.  $^1\text{H}$  NMR spectrum ( $\text{CDCl}_3$  - 600 MHz) of compound E

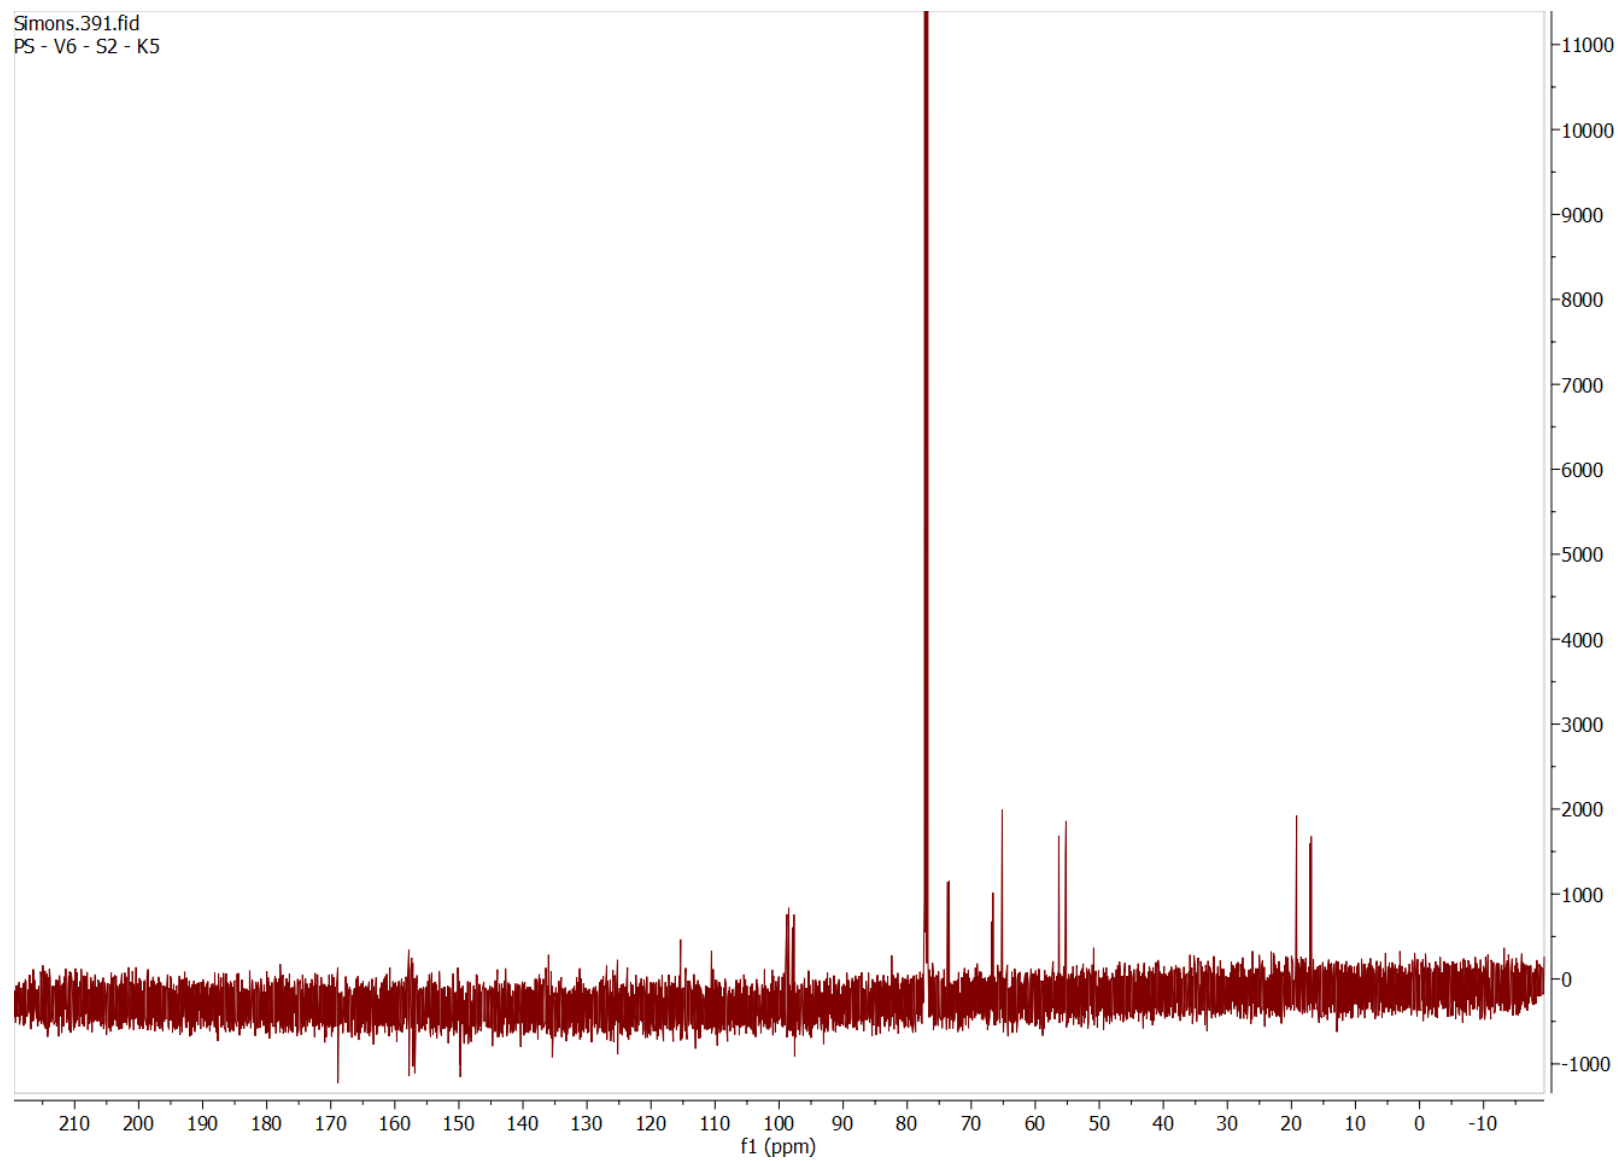

Figure S20.  $^{13}\text{C}$  NMR spectrum ( $\text{CDCl}_3$  - 150 MHz) of compound E

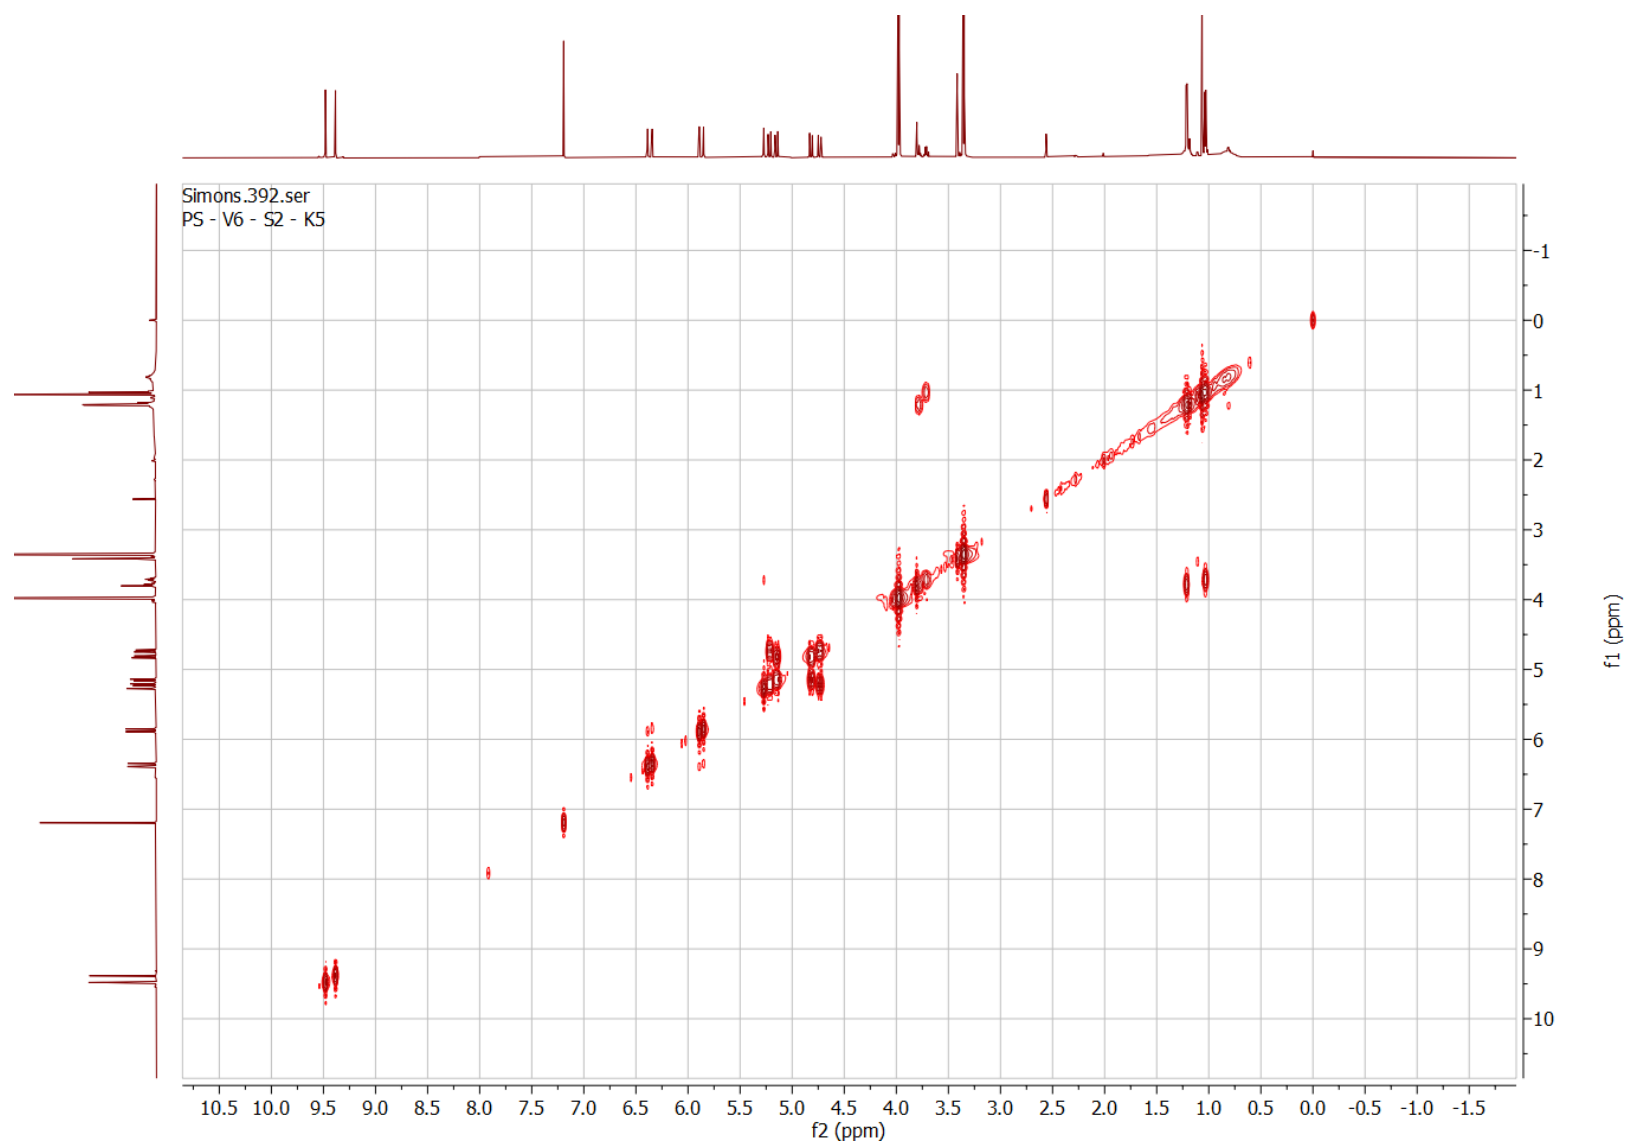

Figure S21. COSY NMR spectrum ( $\text{CDCl}_3$ , 600 MHz) of compound E



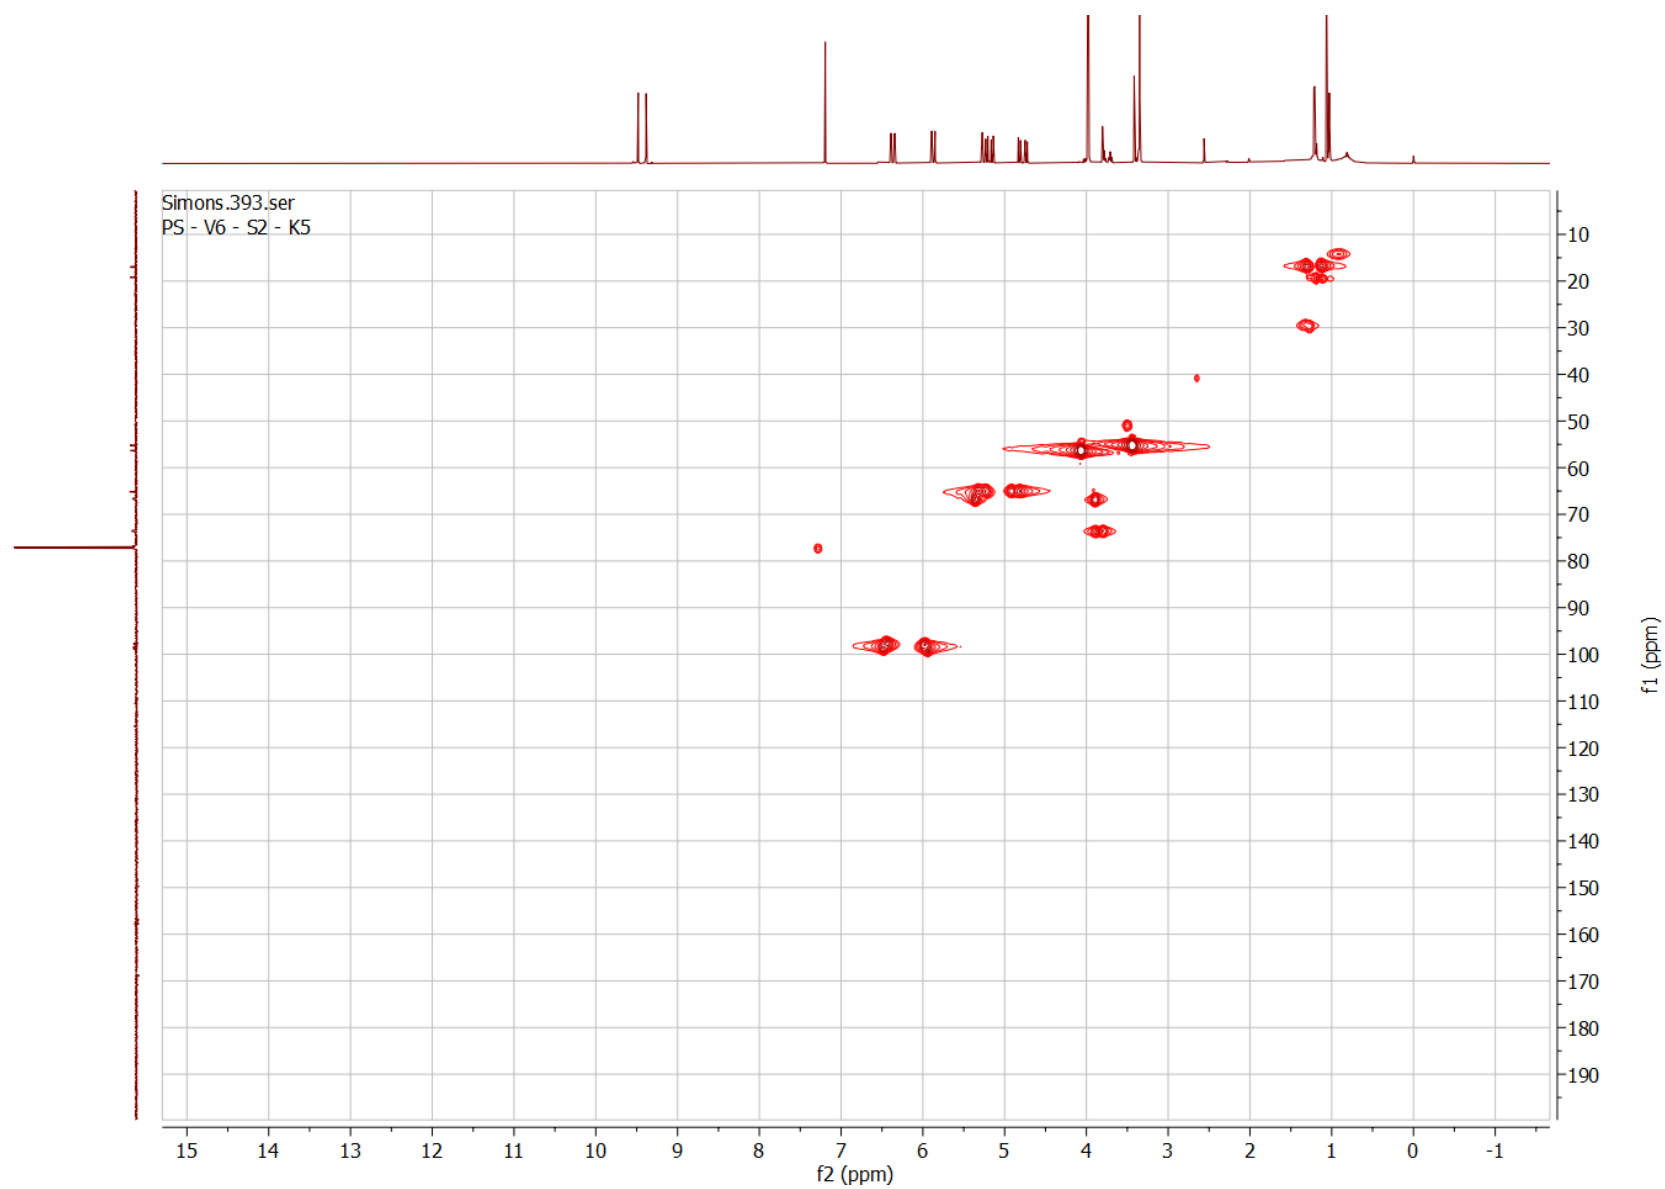

Figure S22. HSQC NMR spectrum ( $\text{CDCl}_3$ , 600 MHz) of compound E

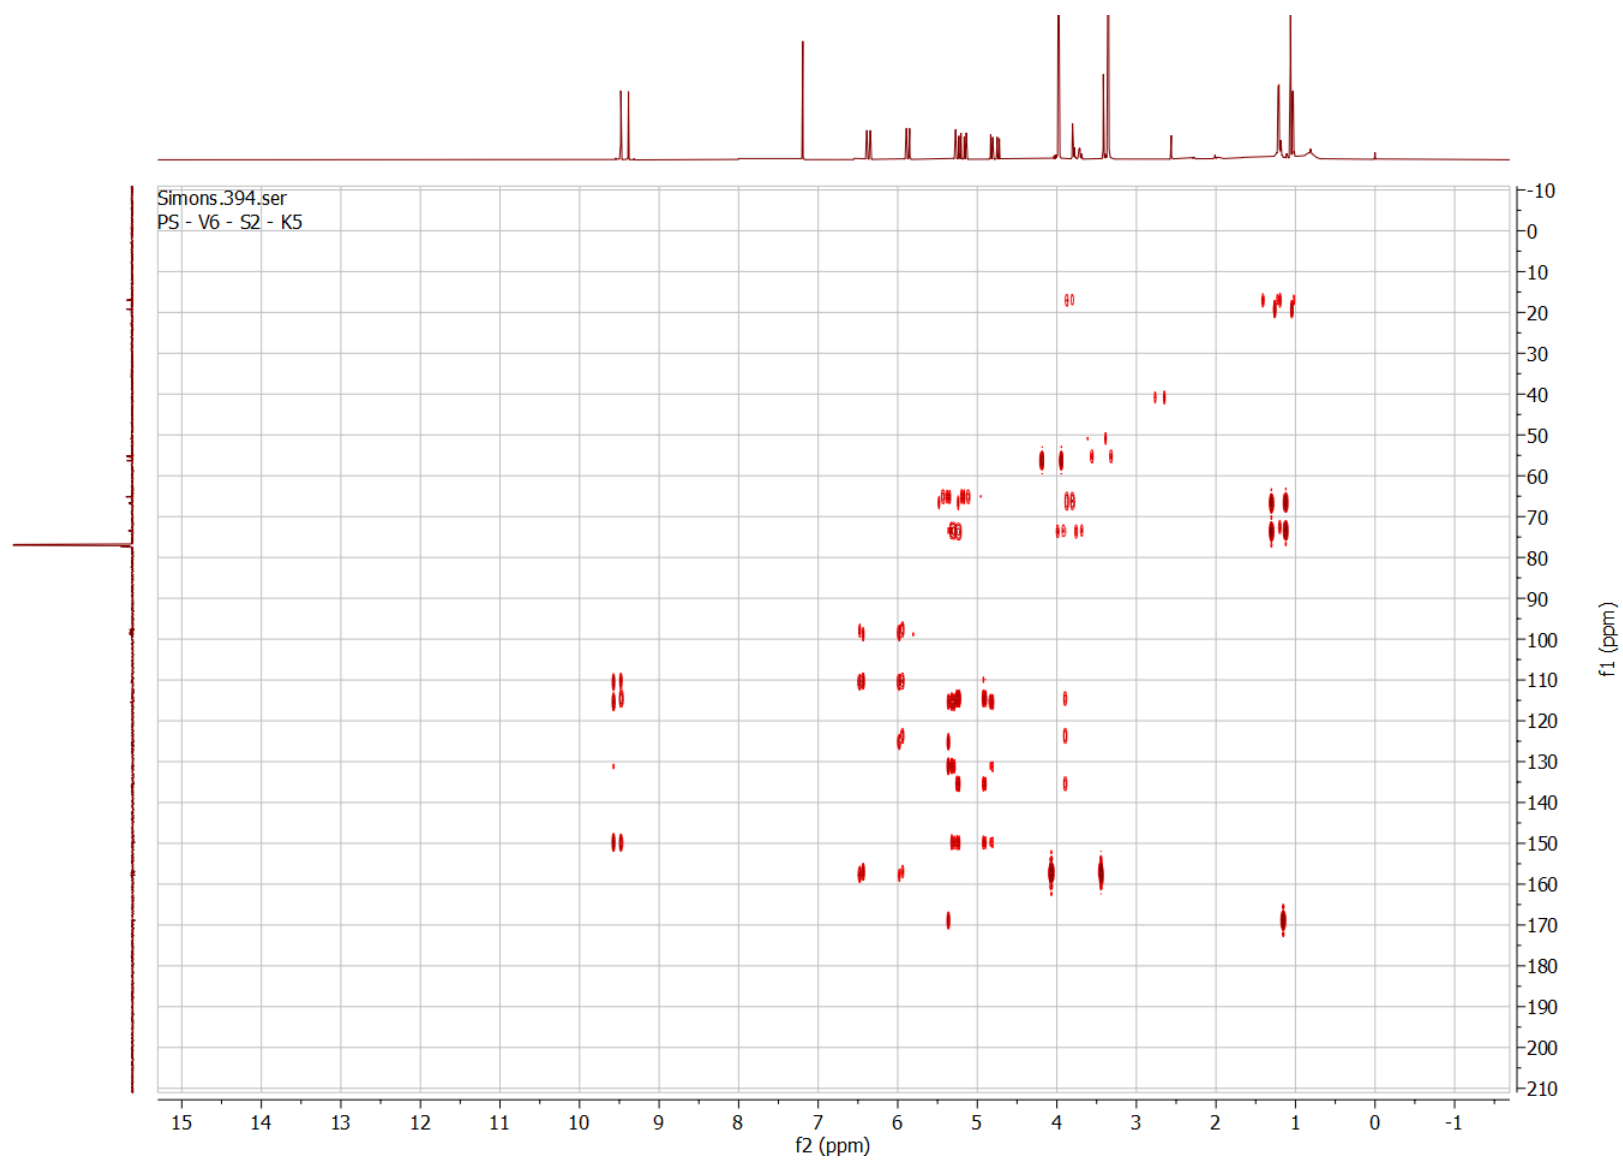

Figure S23. HMBC NMR spectrum ( $\text{CDCl}_3$  - 600 MHz) of compound E

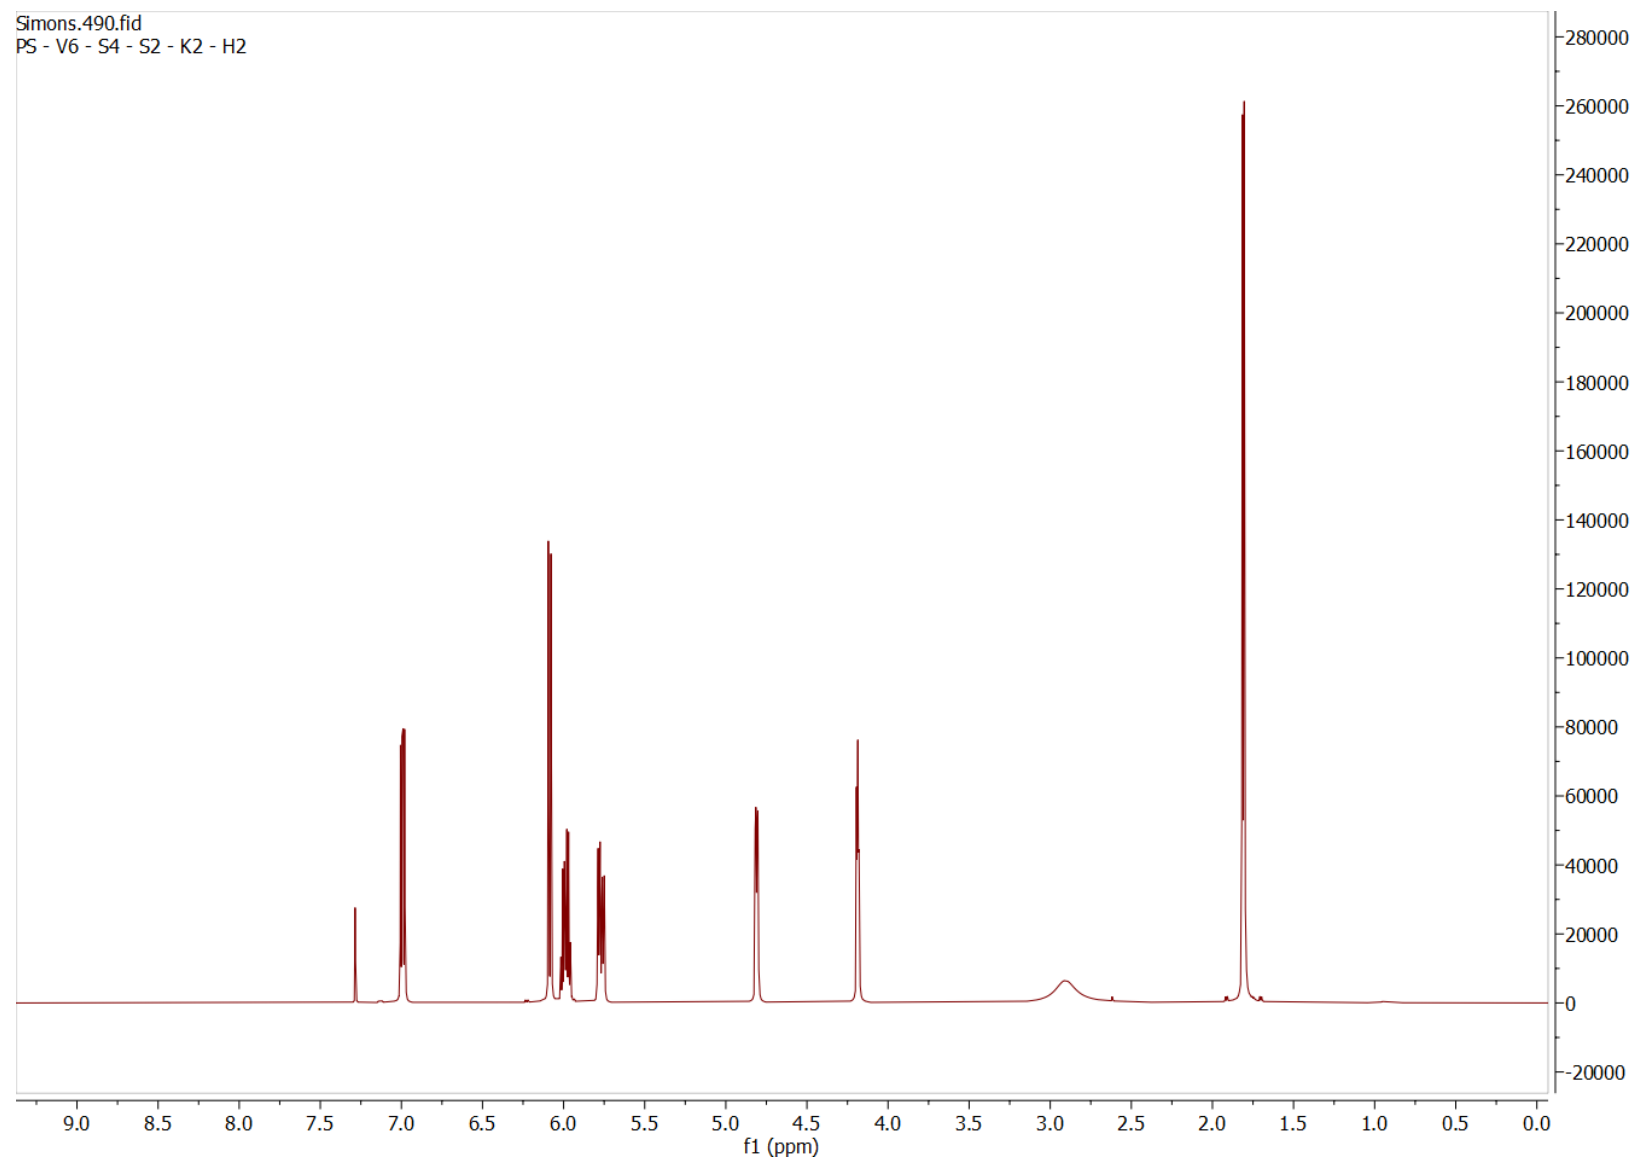

Figure S24.  $^1\text{H}$  NMR spectrum ( $\text{CDCl}_3$  - 600 MHz) of compound F

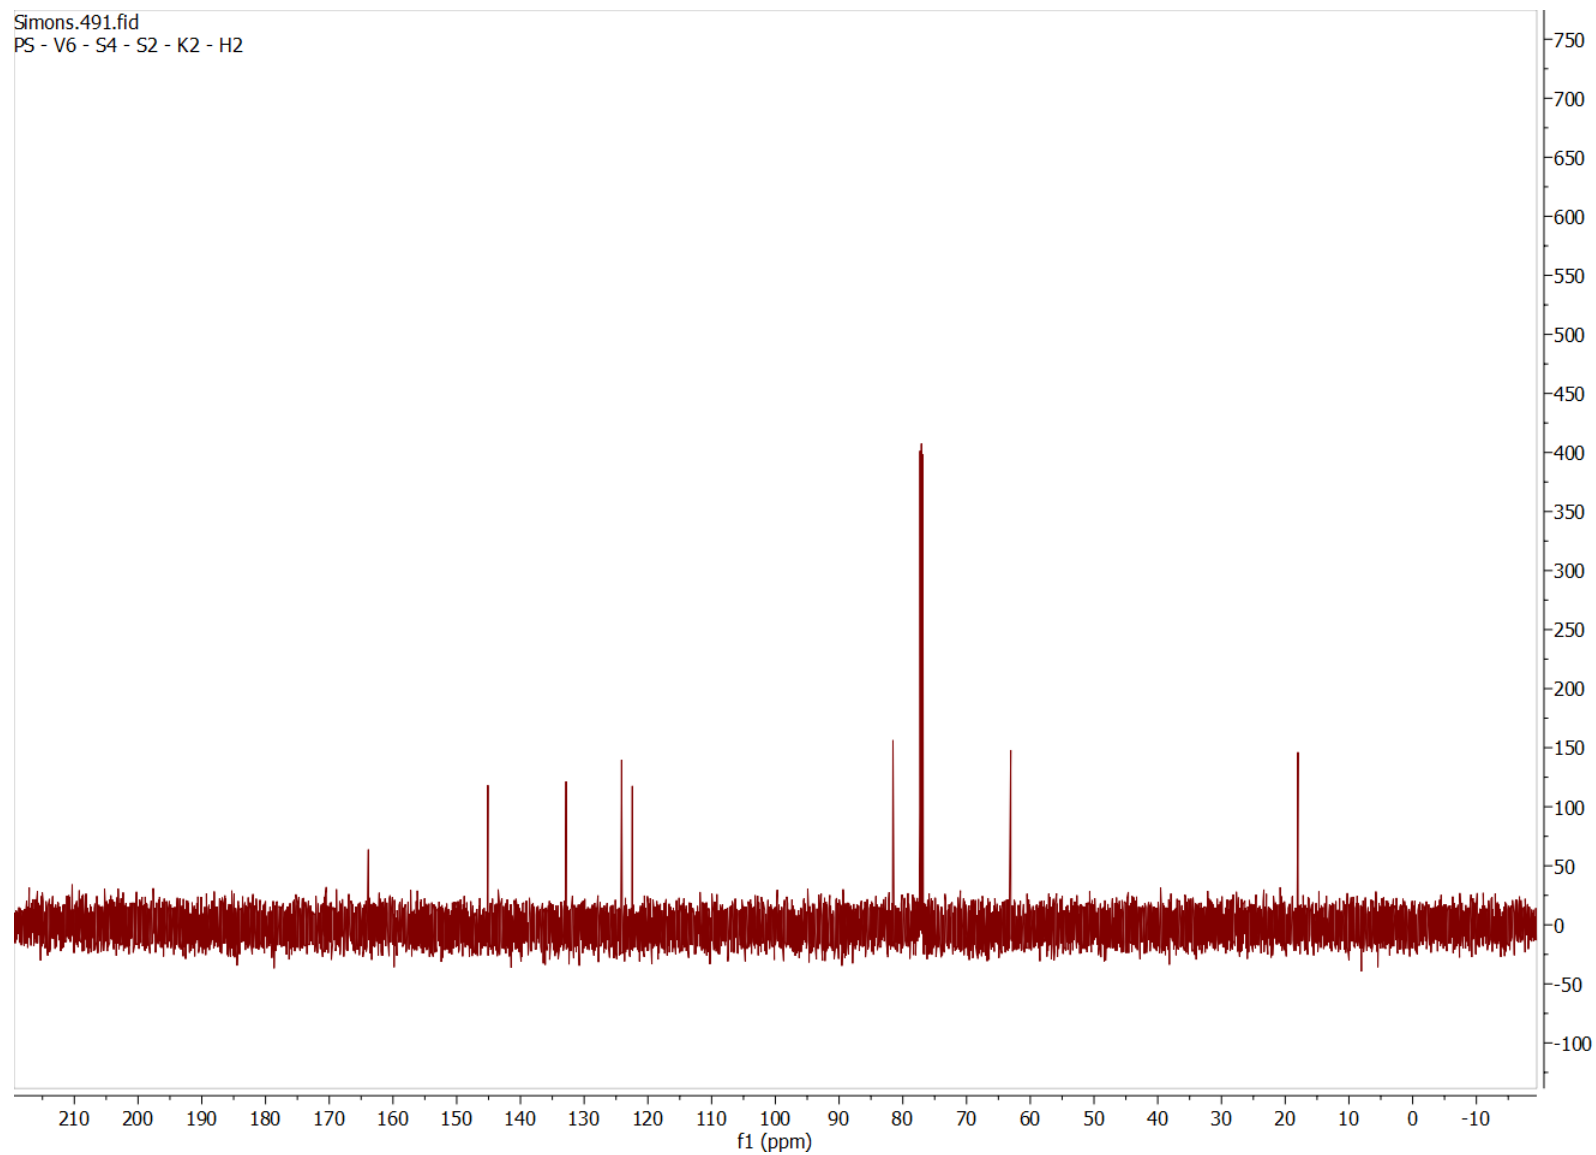

Figure S25.  $^{13}\text{C}$  NMR spectrum ( $\text{CDCl}_3$  - 150 MHz) of compound F

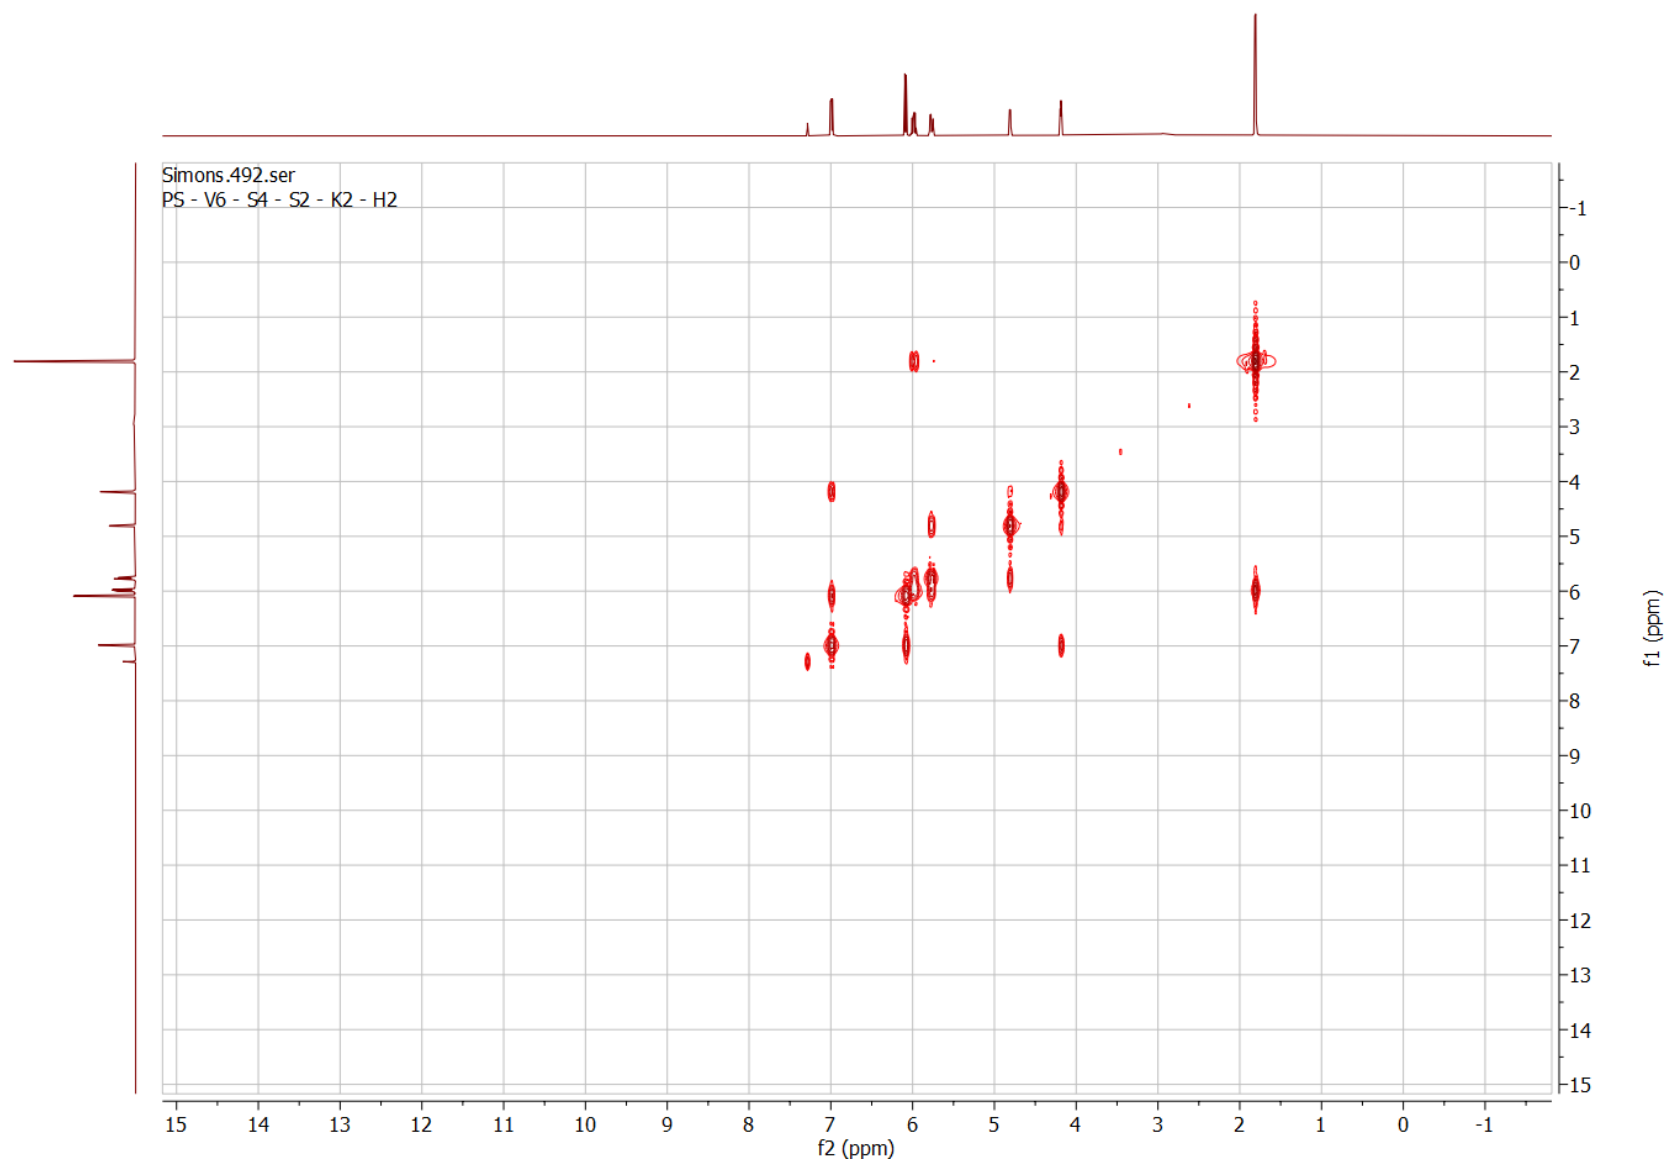

Figure S26. COSY NMR spectrum ( $\text{CDCl}_3$ , 600 MHz) of compound F

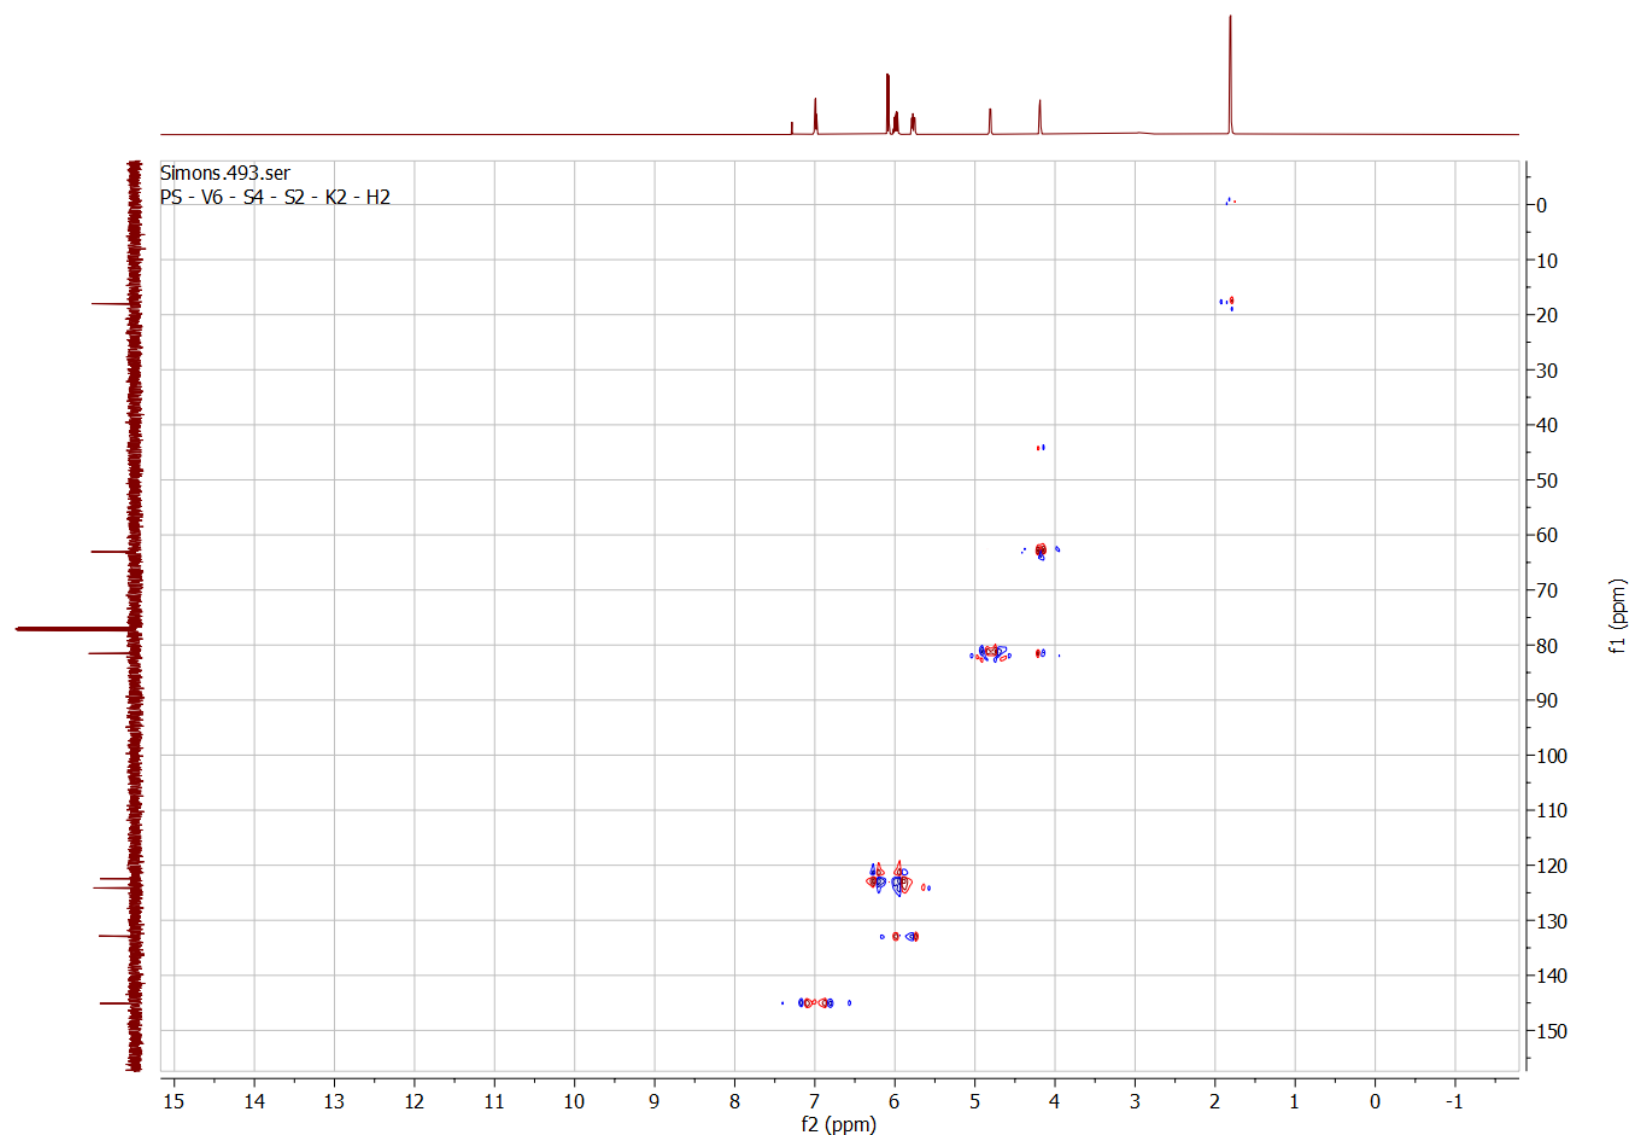

Figure S27. HSQC NMR spectrum ( $\text{CDCl}_3$ , 600 MHz) of compound F

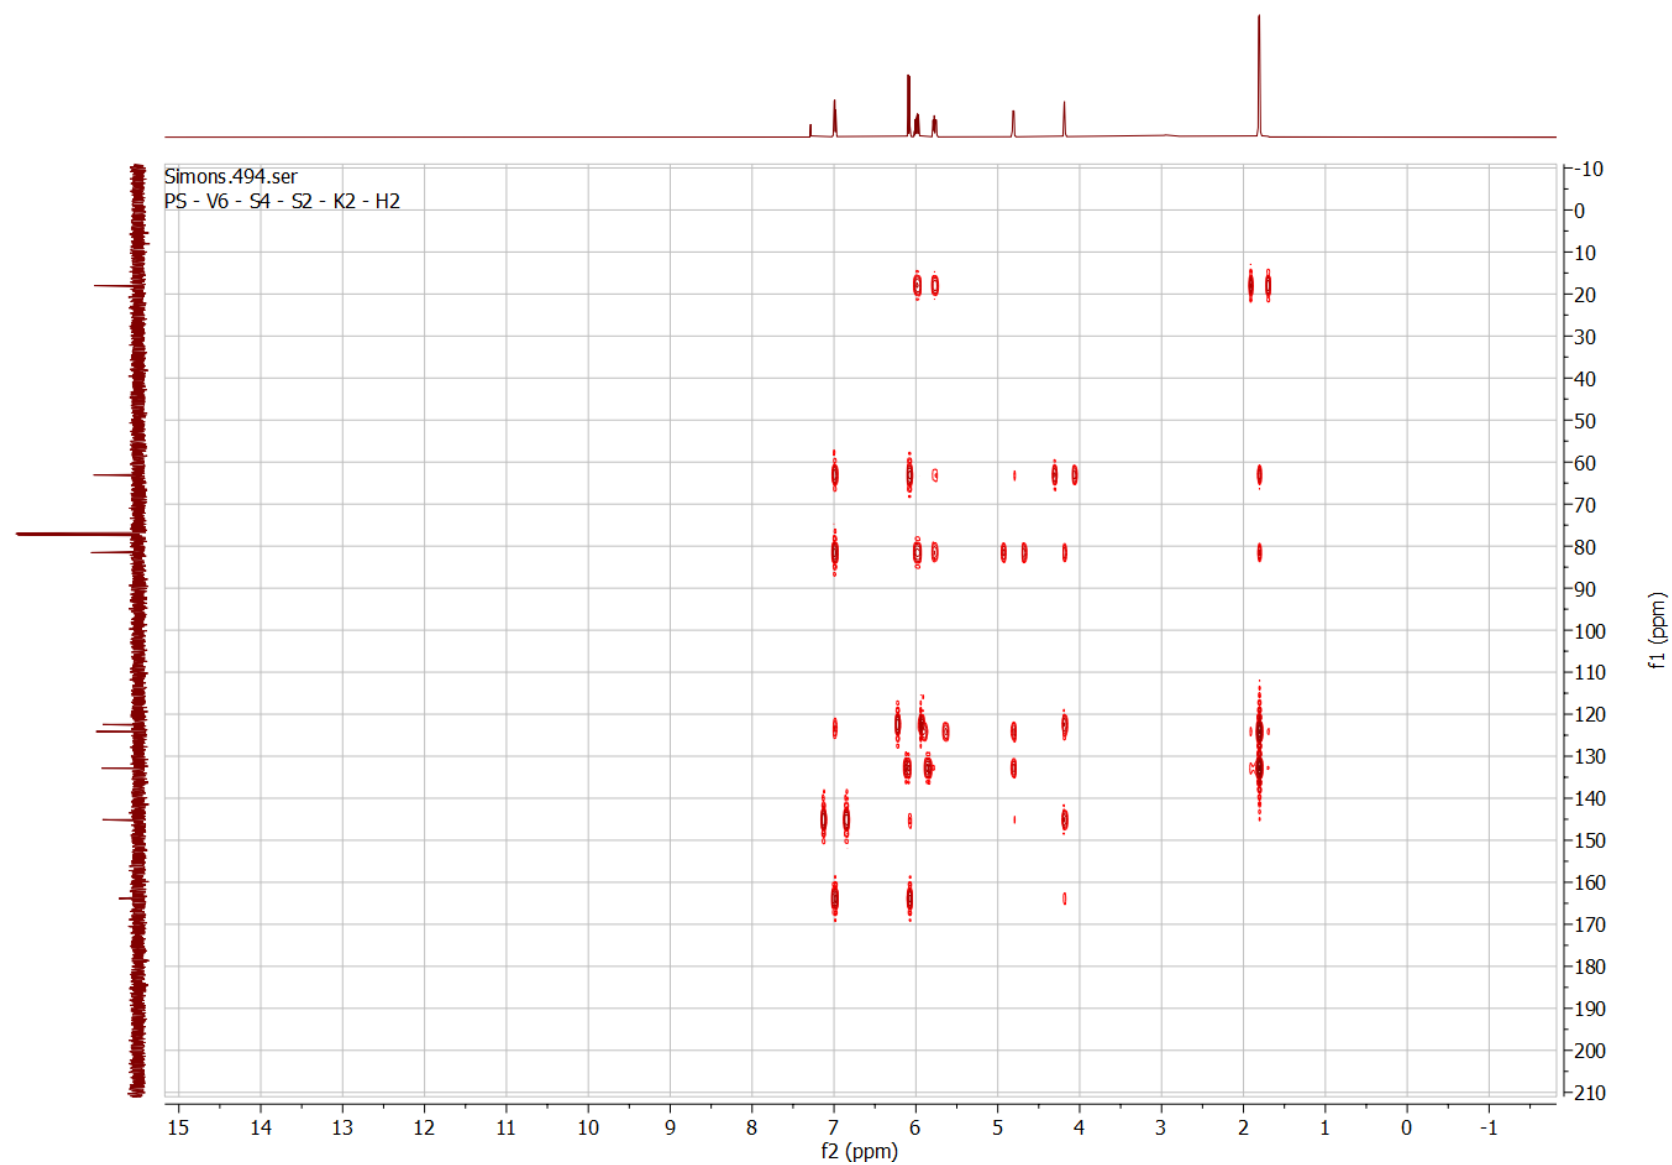Figure S28. HMBC NMR spectrum ( $\text{CDCl}_3$  - 600 MHz) of compound F

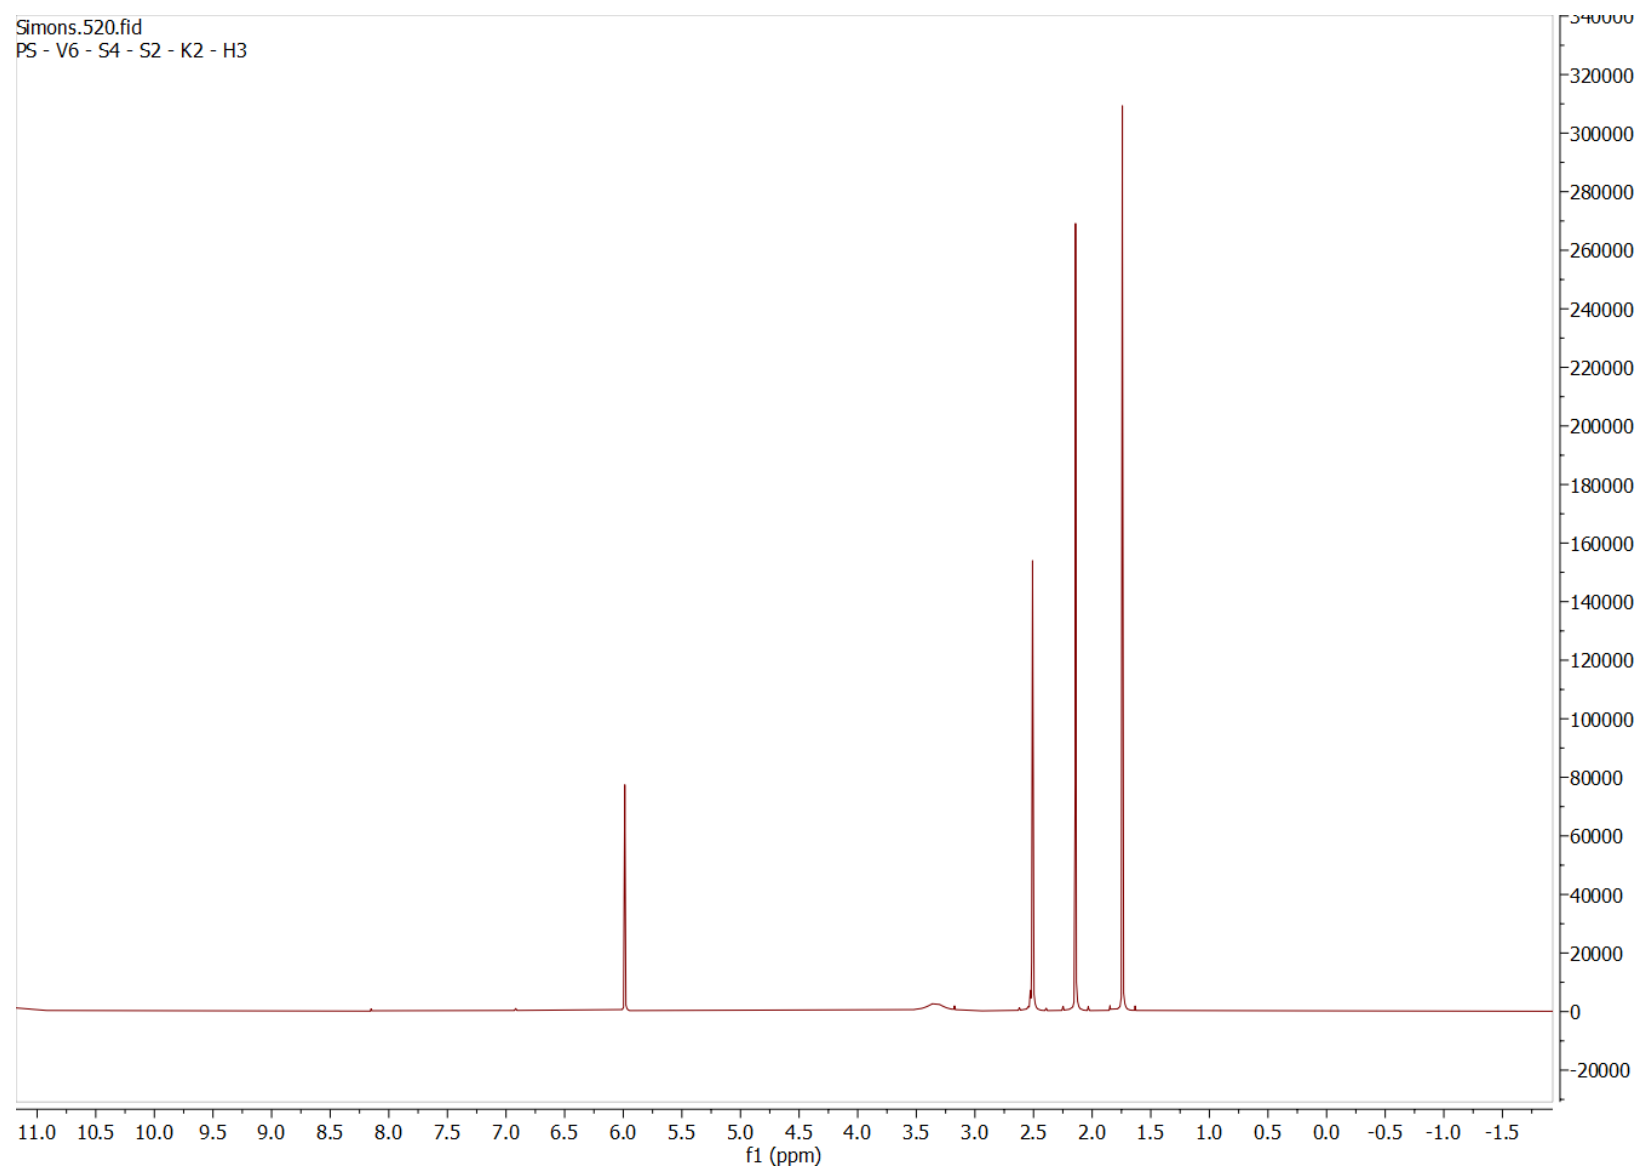

Figure S29.  $^1\text{H}$  NMR spectrum (DMSO- $d_6$  – 600 MHz) of compound G



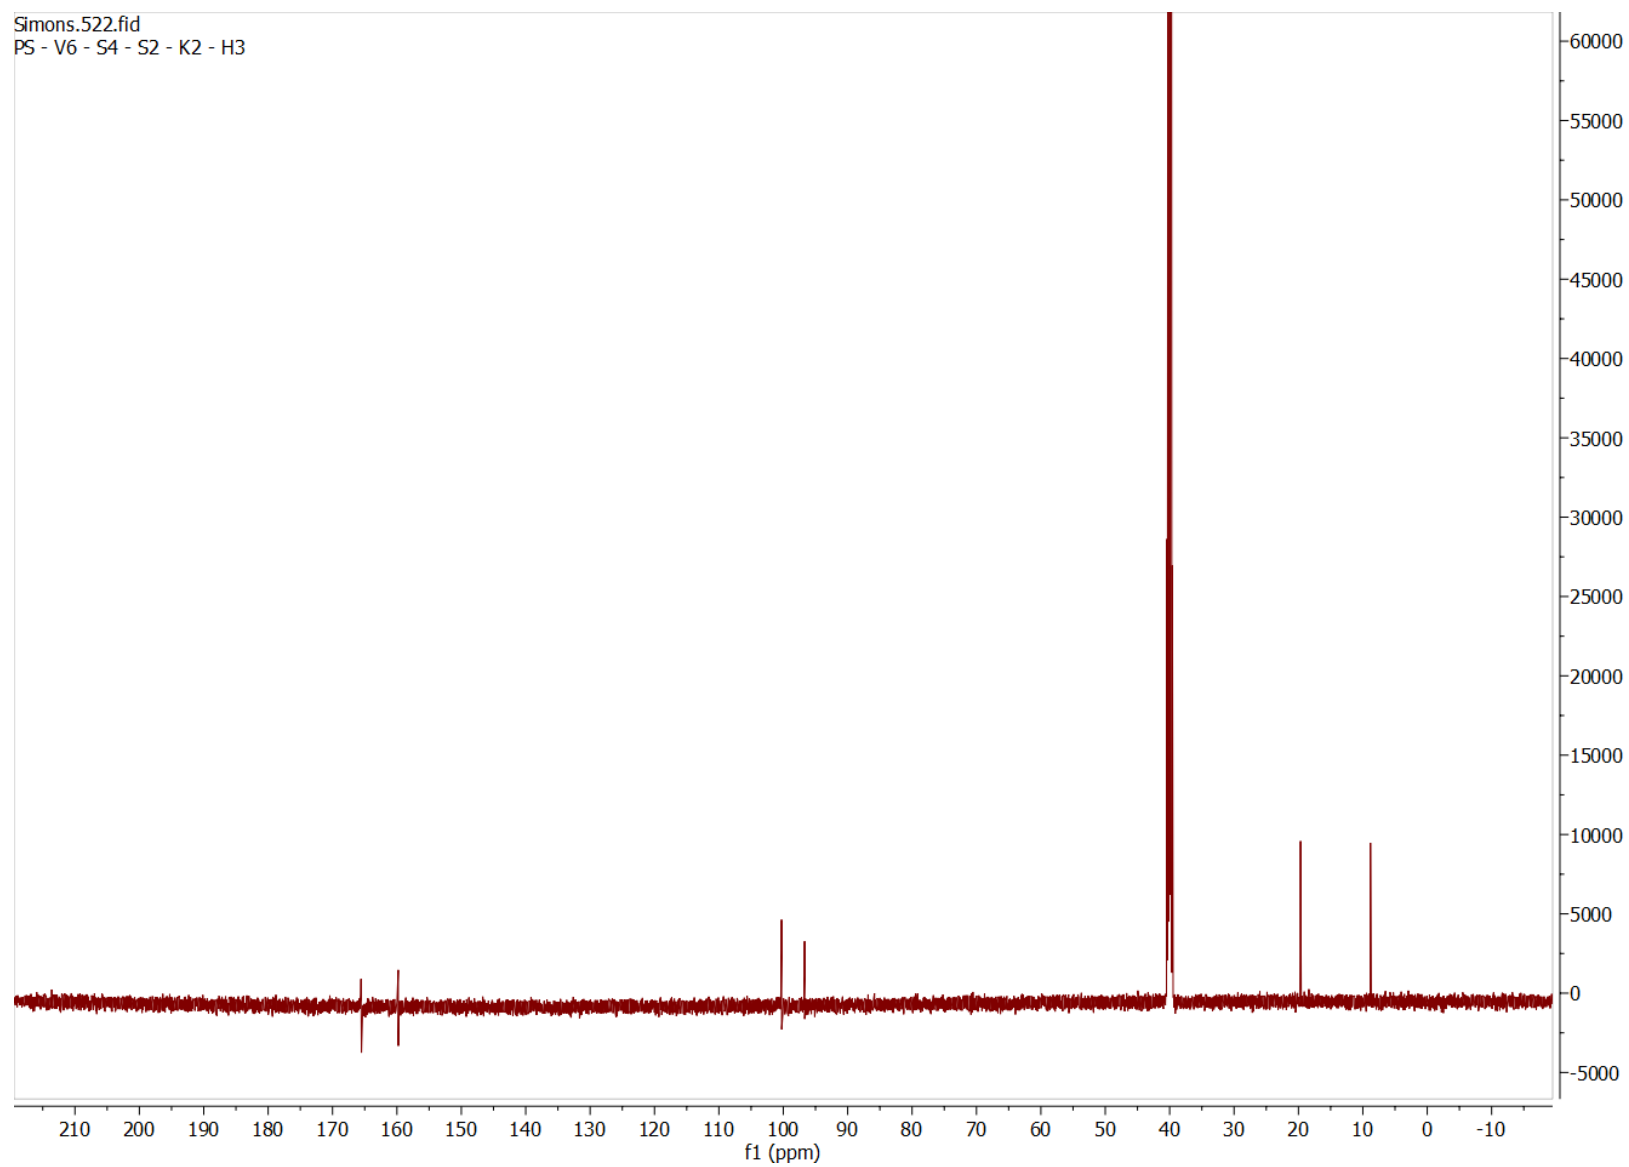

Figure S30.  $^{13}\text{C}$  NMR spectrum (DMSO- $d_6$  – 150 MHz) of compound G

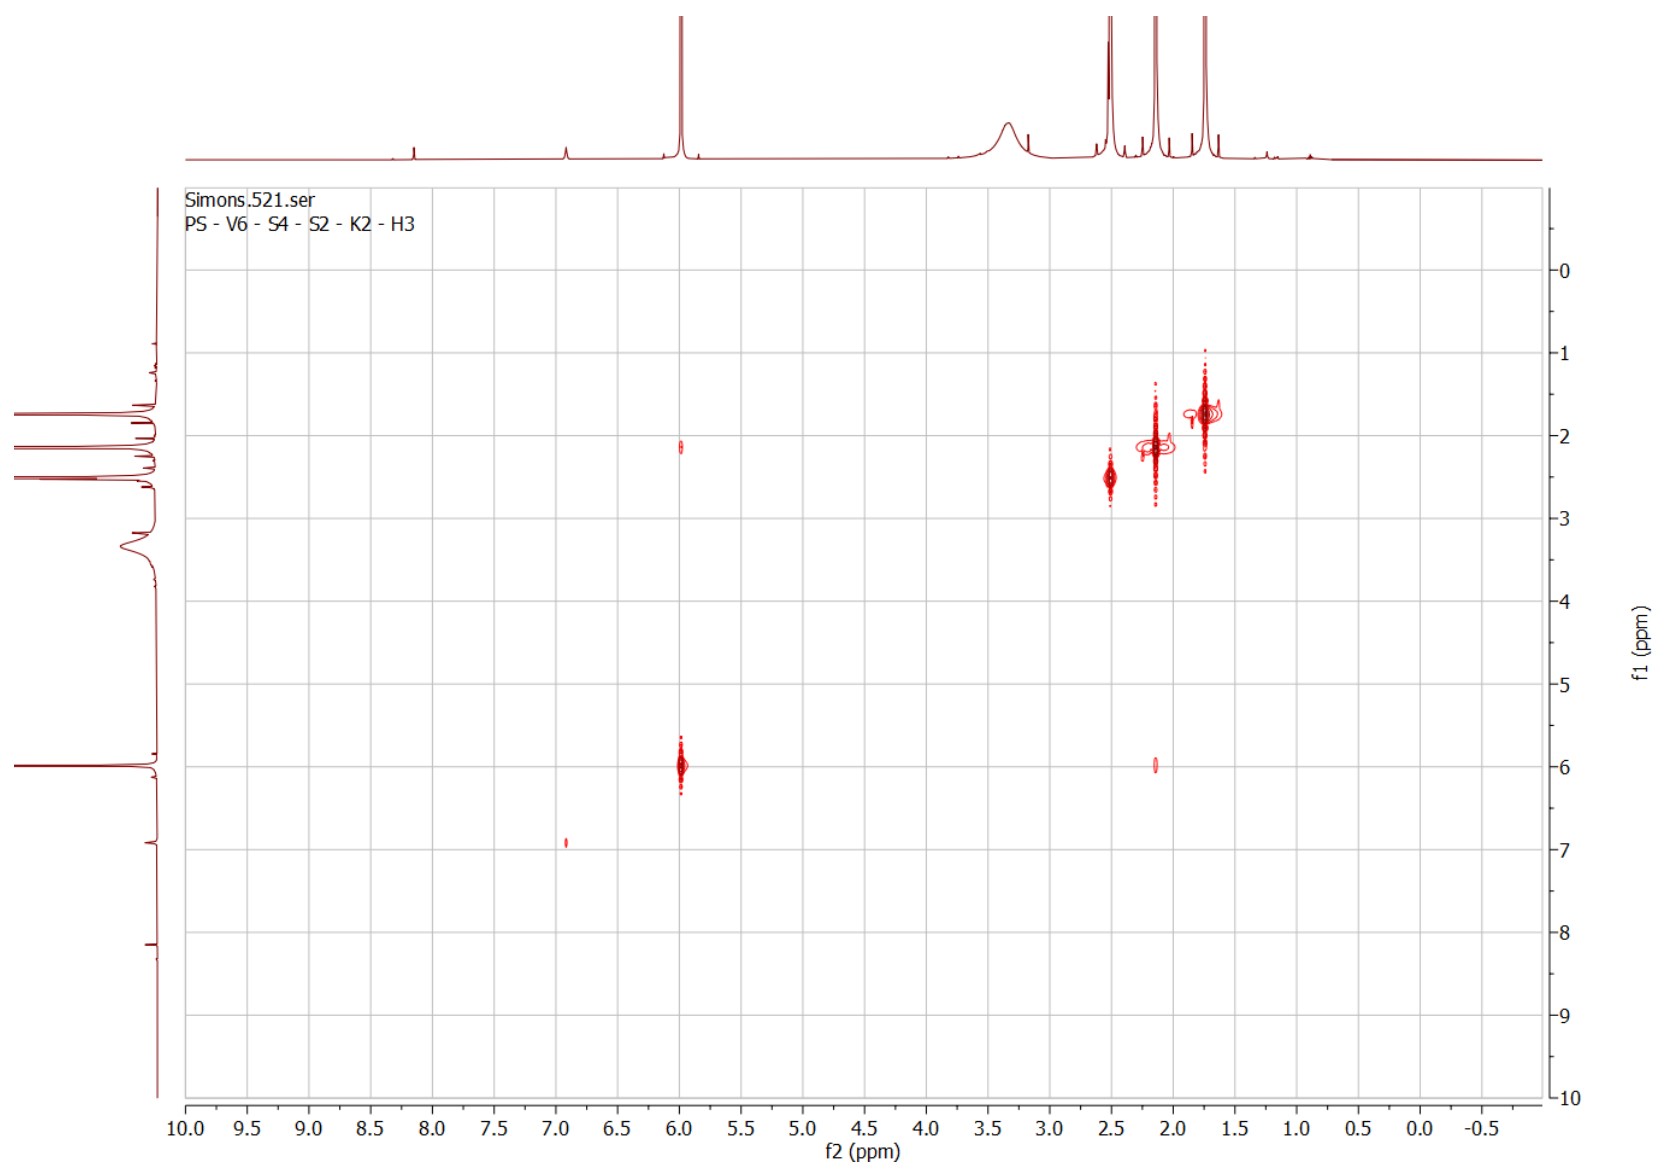

Figure S31. COSY NMR spectrum (DMSO-d<sub>6</sub> – 600 MHz) of compound G

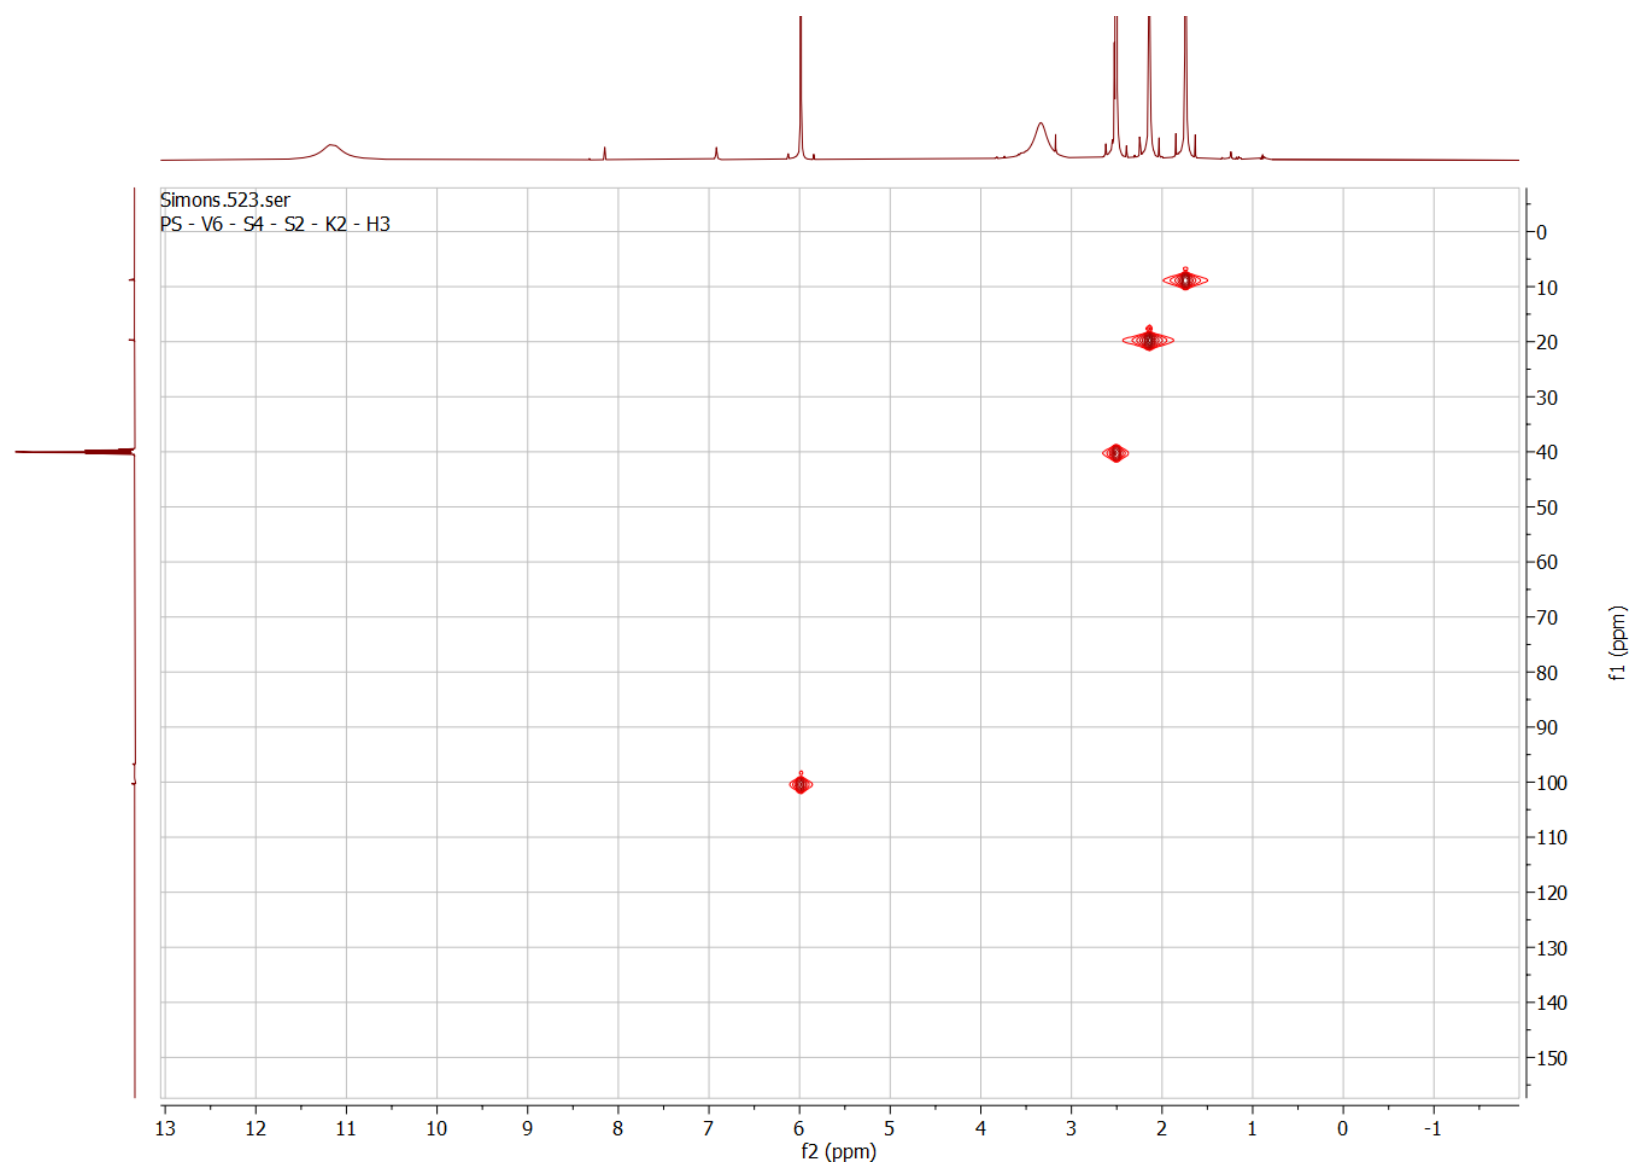

Figure S32. HSQC NMR spectrum (DMSO-d<sub>6</sub> – 600 MHz) of compound G

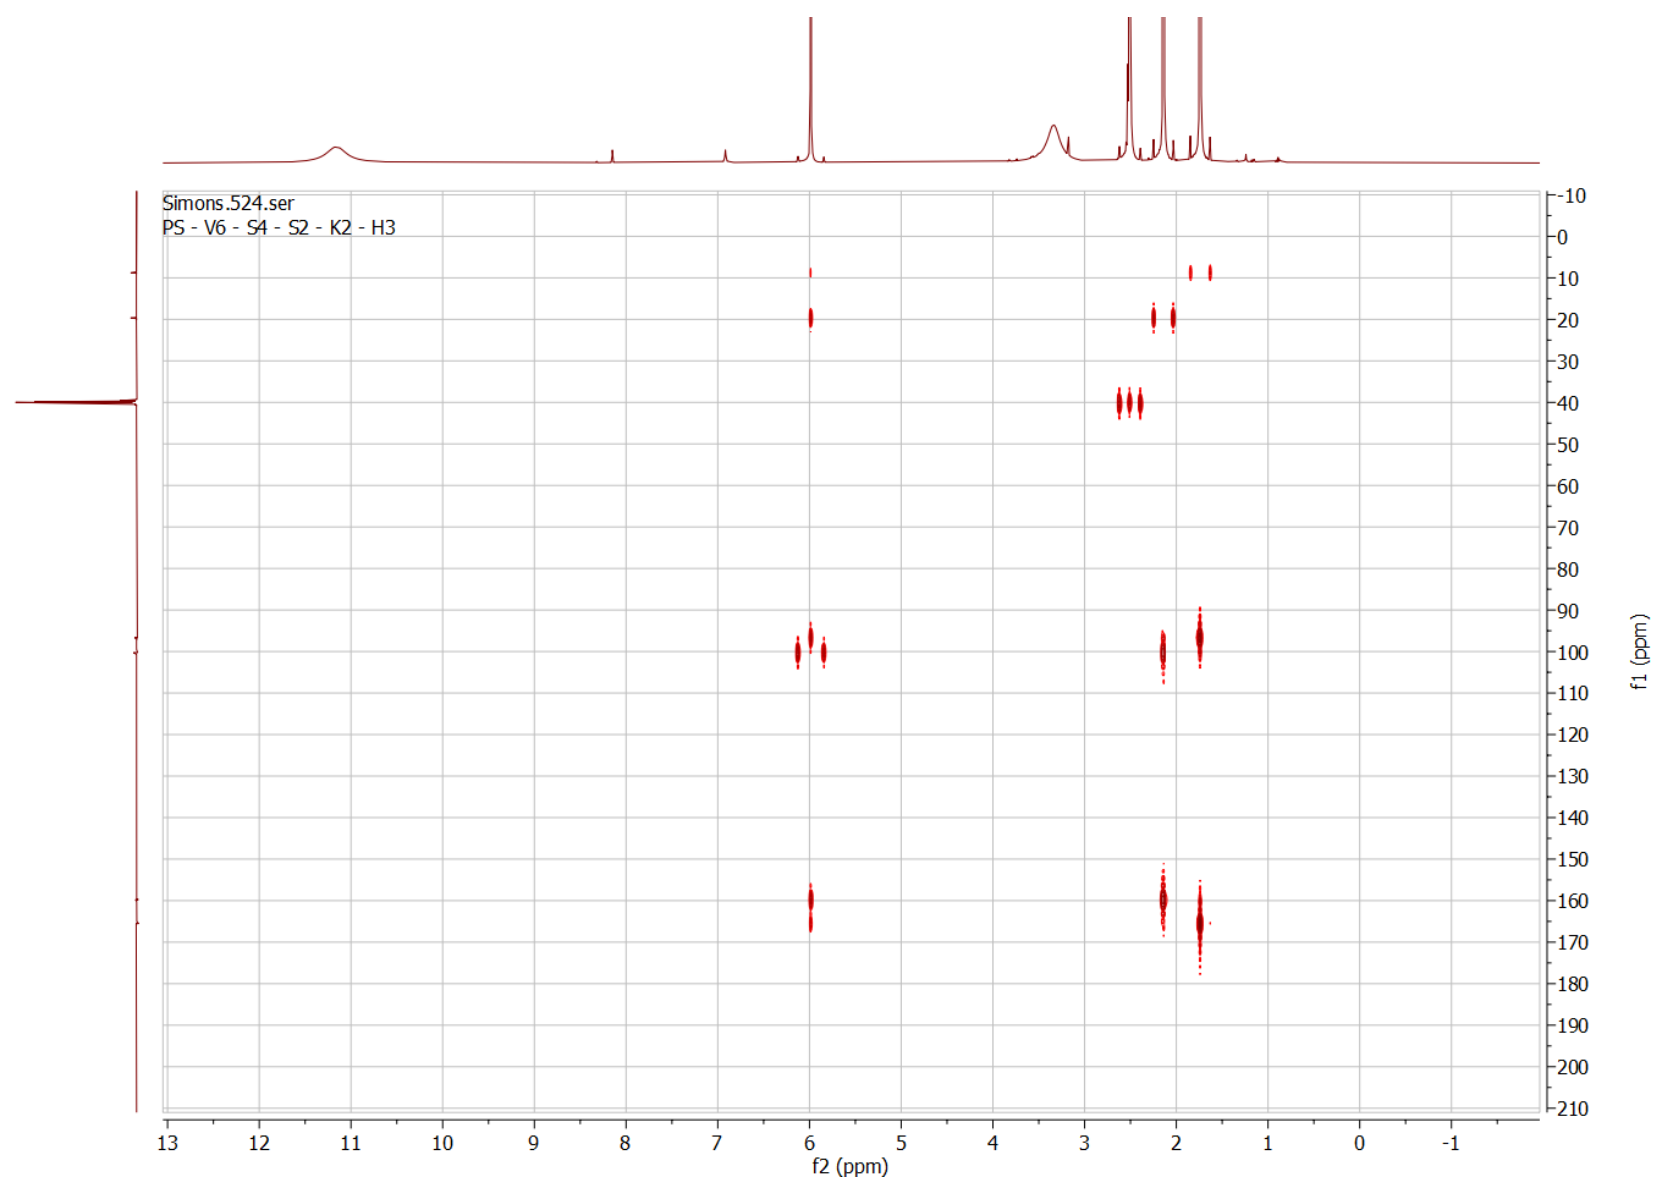

Figure S33. HMBC NMR spectrum (DMSO-d<sub>6</sub> – 600 MHz) of compound G

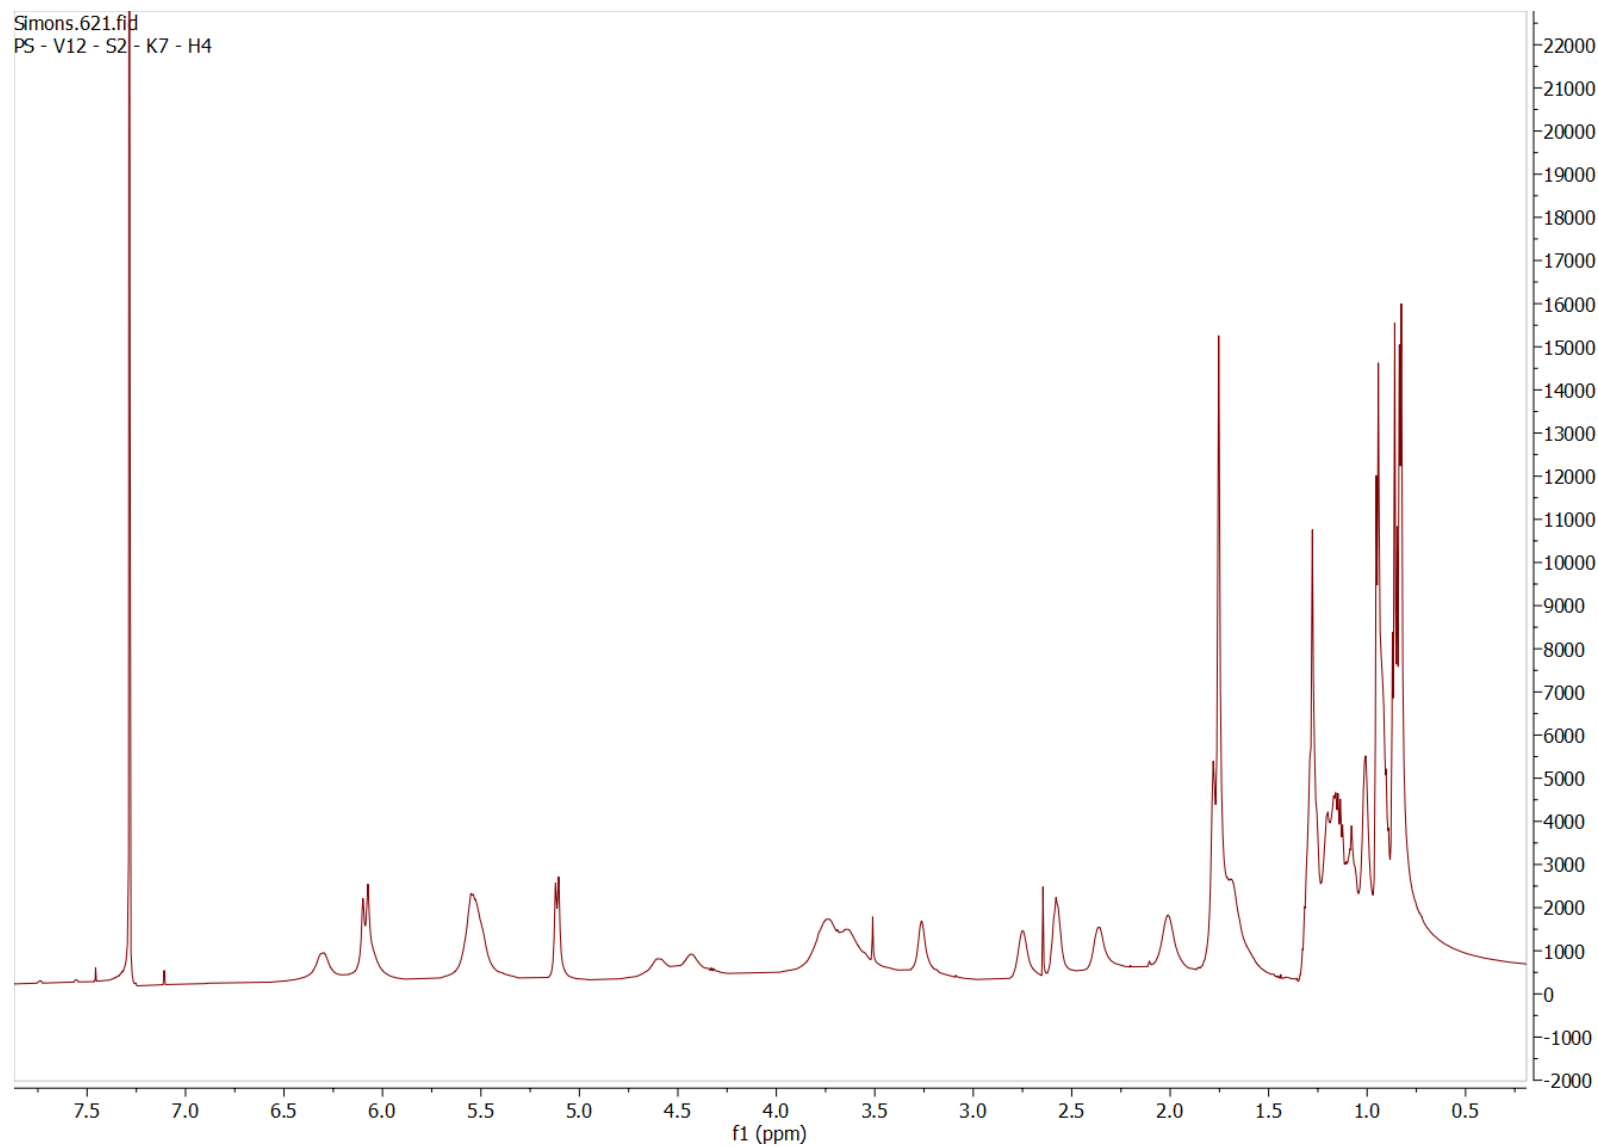

Figure S34.  $^1\text{H}$  NMR spectrum ( $\text{CDCl}_3$  - 600 MHz) of compound H

**Acquisition Parameter**

|             |            |                       |           |                  |           |
|-------------|------------|-----------------------|-----------|------------------|-----------|
| Source Type | ESI        | Ion Polarity          | Positive  | Set Nebulizer    | 0.3 Bar   |
| Focus       | Not active | Set Capillary         | 4000 V    | Set Dry Heater   | 180 °C    |
| Scan Begin  | 50 m/z     | Set End Plate Offset  | -500 V    | Set Dry Gas      | 4.0 l/min |
| Scan End    | 1500 m/z   | Set Collision Cell RF | 600.0 Vpp | Set Divert Valve | Source    |

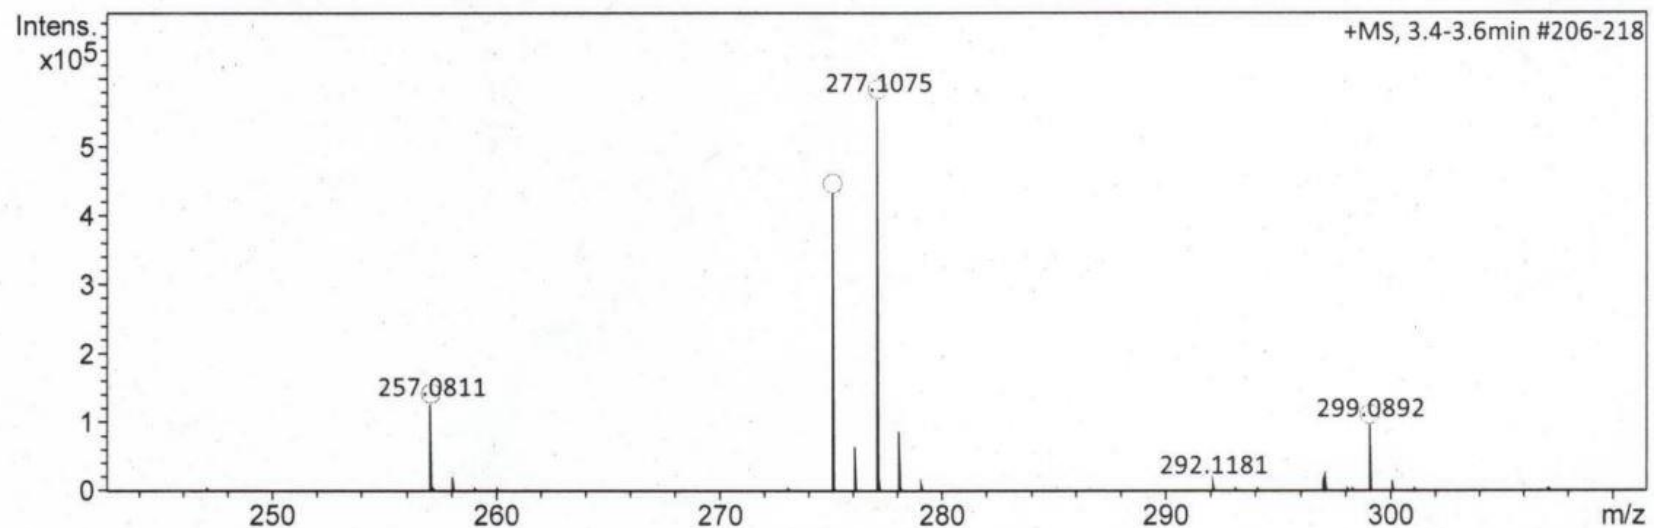

| Meas. m/z | # | Ion Formula                                      | m/z      | err [ppm] | mSigma | # mSigma | Score  | rdb | e <sup>-</sup> Conf | N-Rule |
|-----------|---|--------------------------------------------------|----------|-----------|--------|----------|--------|-----|---------------------|--------|
| 257.0811  | 1 | C <sub>15</sub> H <sub>13</sub> O <sub>4</sub>   | 257.0808 | -1.1      | 7.2    | 1        | 100.00 | 9.5 | even                | ok     |
| 275.0919  | 1 | C <sub>15</sub> H <sub>15</sub> O <sub>5</sub>   | 275.0914 | -1.8      | 581.8  | 1        | 100.00 | 8.5 | even                | ok     |
| 277.1075  | 1 | C <sub>15</sub> H <sub>17</sub> O <sub>5</sub>   | 277.1071 | -1.6      | 8.4    | 1        | 100.00 | 7.5 | even                | ok     |
| 299.0892  | 1 | C <sub>15</sub> H <sub>16</sub> NaO <sub>5</sub> | 299.0890 | -0.8      | 0.6    | 1        | 100.00 | 7.5 | even                | ok     |

Figure S35. HRESIMS (MeOH) of compound A

**Acquisition Parameter**

|             |            |                       |           |                  |           |
|-------------|------------|-----------------------|-----------|------------------|-----------|
| Source Type | ESI        | Ion Polarity          | Positive  | Set Nebulizer    | 0.3 Bar   |
| Focus       | Not active | Set Capillary         | 4000 V    | Set Dry Heater   | 180 °C    |
| Scan Begin  | 50 m/z     | Set End Plate Offset  | -500 V    | Set Dry Gas      | 4.0 l/min |
| Scan End    | 1500 m/z   | Set Collision Cell RF | 600.0 Vpp | Set Divert Valve | Source    |

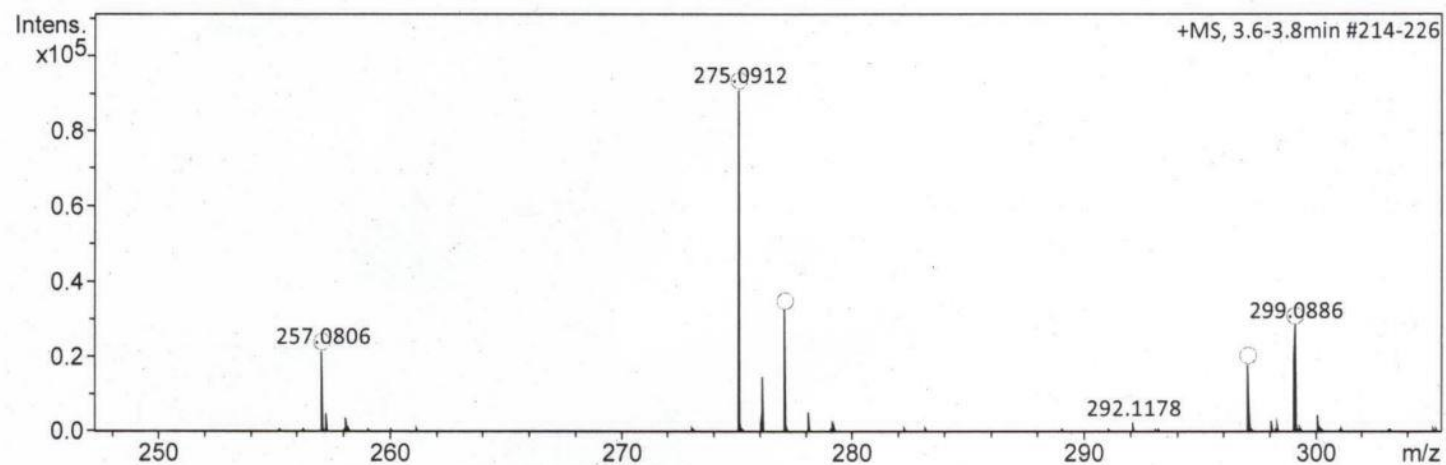

| Meas. m/z | # | Ion Formula                                                   | m/z      | err [ppm] | mSigma | # mSigma | Score  | rdb  | e <sup>-</sup> Conf | N-Rule |
|-----------|---|---------------------------------------------------------------|----------|-----------|--------|----------|--------|------|---------------------|--------|
| 257.0806  | 1 | C <sub>15</sub> H <sub>13</sub> O <sub>4</sub>                | 257.0808 | 1.1       | 5.7    | 1        | 100.00 | 9.5  | even                | ok     |
| 275.0912  | 1 | C <sub>15</sub> H <sub>15</sub> O <sub>5</sub>                | 275.0914 | 0.7       | 192.5  | 1        | 100.00 | 8.5  | even                | ok     |
| 277.1065  | 1 | C <sub>15</sub> H <sub>17</sub> O <sub>5</sub>                | 277.1071 | 2.1       | 4.8    | 1        | 98.95  | 7.5  | even                | ok     |
|           | 2 | C <sub>14</sub> H <sub>14</sub> N <sub>4</sub> NaO            | 277.1060 | -1.8      | 6.5    | 2        | 100.00 | 9.5  | even                | ok     |
| 297.0730  | 1 | C <sub>13</sub> H <sub>9</sub> N <sub>6</sub> O <sub>3</sub>  | 297.0731 | 0.3       | 11.1   | 1        | 100.00 | 12.5 | even                | ok     |
|           | 2 | C <sub>15</sub> H <sub>14</sub> NaO <sub>5</sub>              | 297.0733 | 1.2       | 602.8  | 2        | 0.00   | 8.5  | even                | ok     |
| 299.0886  | 1 | C <sub>13</sub> H <sub>11</sub> N <sub>6</sub> O <sub>3</sub> | 299.0887 | 0.4       | 3.4    | 1        | 100.00 | 11.5 | even                | ok     |
|           | 2 | C <sub>15</sub> H <sub>16</sub> NaO <sub>5</sub>              | 299.0890 | 1.3       | 4.2    | 2        | 87.30  | 7.5  | even                | ok     |

Figure S36. HRESIMS (MeOH) of compound B

**Acquisition Parameter**

|             |            |                       |           |                  |           |
|-------------|------------|-----------------------|-----------|------------------|-----------|
| Source Type | ESI        | Ion Polarity          | Positive  | Set Nebulizer    | 0.3 Bar   |
| Focus       | Not active | Set Capillary         | 4000 V    | Set Dry Heater   | 180 °C    |
| Scan Begin  | 50 m/z     | Set End Plate Offset  | -500 V    | Set Dry Gas      | 4.0 l/min |
| Scan End    | 1500 m/z   | Set Collision Cell RF | 600.0 Vpp | Set Divert Valve | Source    |

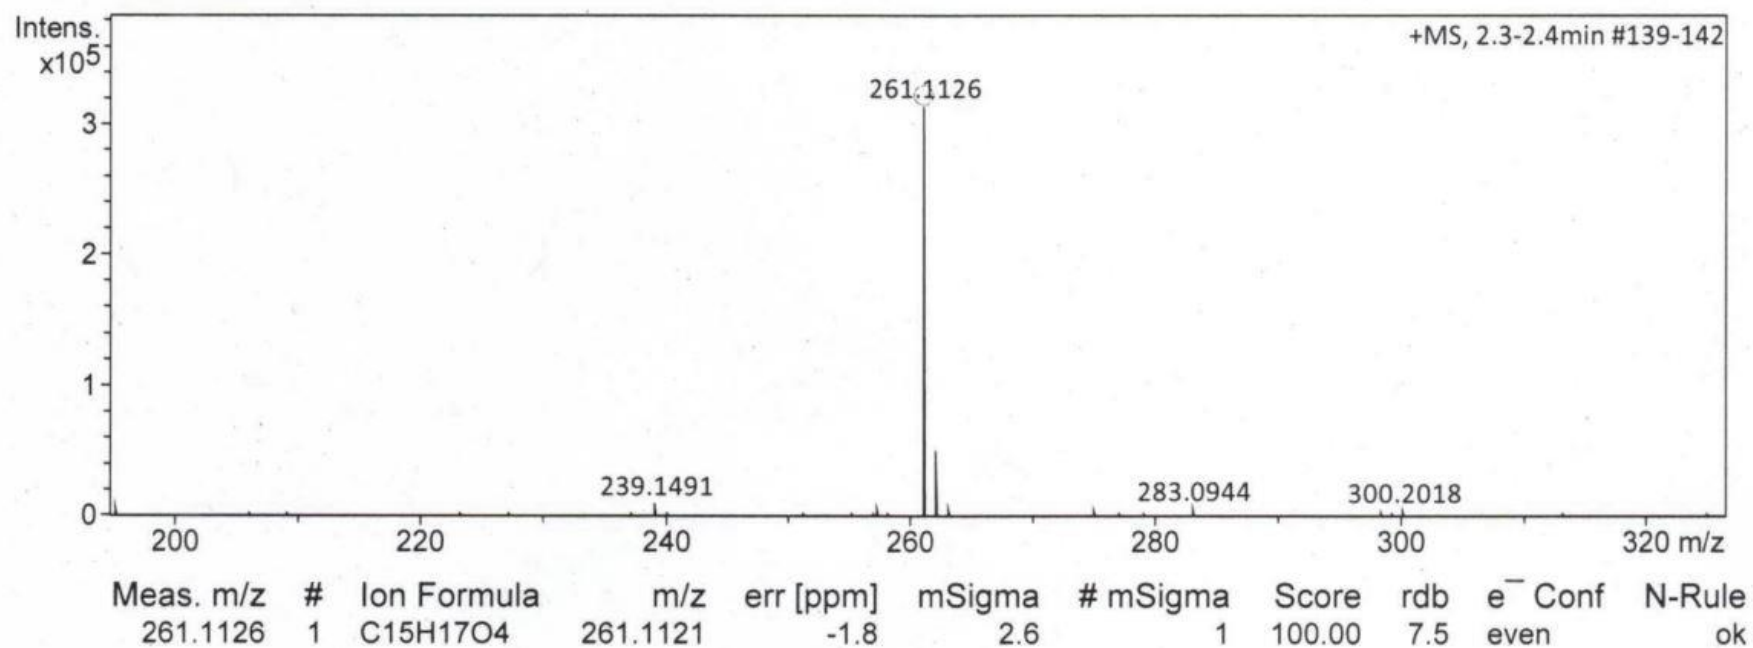

Figure S37. HRESIMS (MeOH) of compound C



**Acquisition Parameter**

|             |            |                       |           |                  |           |
|-------------|------------|-----------------------|-----------|------------------|-----------|
| Source Type | ESI        | Ion Polarity          | Positive  | Set Nebulizer    | 0.3 Bar   |
| Focus       | Not active | Set Capillary         | 4000 V    | Set Dry Heater   | 180 °C    |
| Scan Begin  | 50 m/z     | Set End Plate Offset  | -500 V    | Set Dry Gas      | 4.0 l/min |
| Scan End    | 1500 m/z   | Set Collision Cell RF | 600.0 Vpp | Set Divert Valve | Source    |

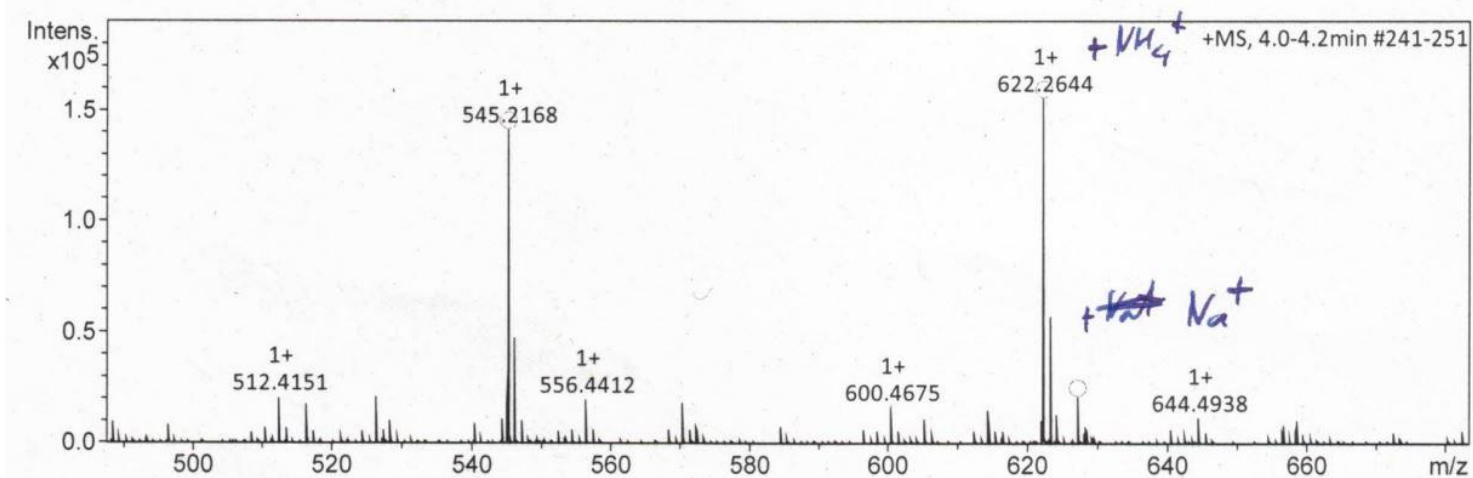

| Meas. m/z | # | Ion Formula   | m/z      | err [ppm] | mSigma | # mSigma | Score  | rdB  | e <sup>-</sup> Conf | N-Rule |
|-----------|---|---------------|----------|-----------|--------|----------|--------|------|---------------------|--------|
| 545.2168  | 1 | C32H33O8      | 545.2170 | 0.4       | 8.6    | 1        | 100.00 | 16.5 | even                | ok     |
|           | 2 | C29H25N10O2   | 545.2156 | -2.1      | 10.0   | 2        | 60.03  | 22.5 | even                | ok     |
|           | 3 | C33H29N4O4    | 545.2183 | 2.8       | 20.2   | 3        | 38.17  | 21.5 | even                | ok     |
| 622.2644  | 1 | C34H40NO10    | 622.2647 | 0.4       | 6.3    | 1        | 100.00 | 15.5 | even                | ok     |
|           | 2 | C31H32N11O4   | 622.2633 | -1.8      | 7.7    | 2        | 63.41  | 21.5 | even                | ok     |
|           | 3 | C35H36N5O6    | 622.2660 | 2.6       | 17.9   | 3        | 38.03  | 20.5 | even                | ok     |
|           | 4 | C32H28N15     | 622.2647 | 0.4       | 18.6   | 4        | 79.33  | 26.5 | even                | ok     |
| 627.2193  | 1 | C34H36NaO10   | 627.2201 | 1.2       | 11.0   | 1        | 100.00 | 16.5 | even                | ok     |
|           | 2 | C30H32N6NaO8  | 627.2174 | -3.1      | 11.3   | 2        | 45.90  | 17.5 | even                | ok     |
|           | 3 | C31H28N10NaO4 | 627.2187 | -1.0      | 14.8   | 3        | 98.78  | 22.5 | even                | ok     |
|           | 4 | C32H24N14Na   | 627.2201 | 1.2       | 24.2   | 4        | 76.55  | 27.5 | even                | ok     |

Figure S38. HRESIMS (MeOH) of compound D

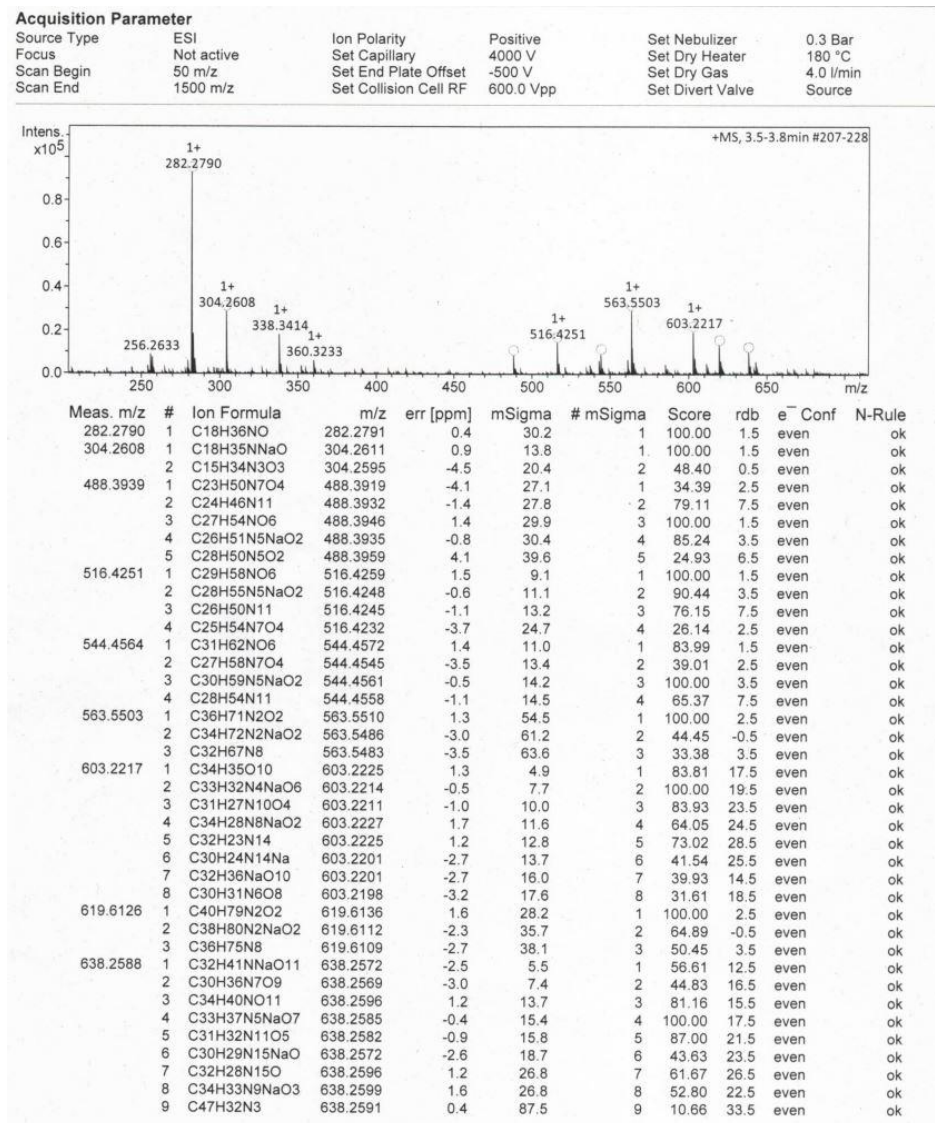

Figure S39. HRESIMS (MeOH) of compound E

**Acquisition Parameter**

|             |            |                       |           |                  |           |
|-------------|------------|-----------------------|-----------|------------------|-----------|
| Source Type | ESI        | Ion Polarity          | Positive  | Set Nebulizer    | 0.3 Bar   |
| Focus       | Not active | Set Capillary         | 4000 V    | Set Dry Heater   | 180 °C    |
| Scan Begin  | 50 m/z     | Set End Plate Offset  | -500 V    | Set Dry Gas      | 4.0 l/min |
| Scan End    | 1500 m/z   | Set Collision Cell RF | 600.0 Vpp | Set Divert Valve | Source    |

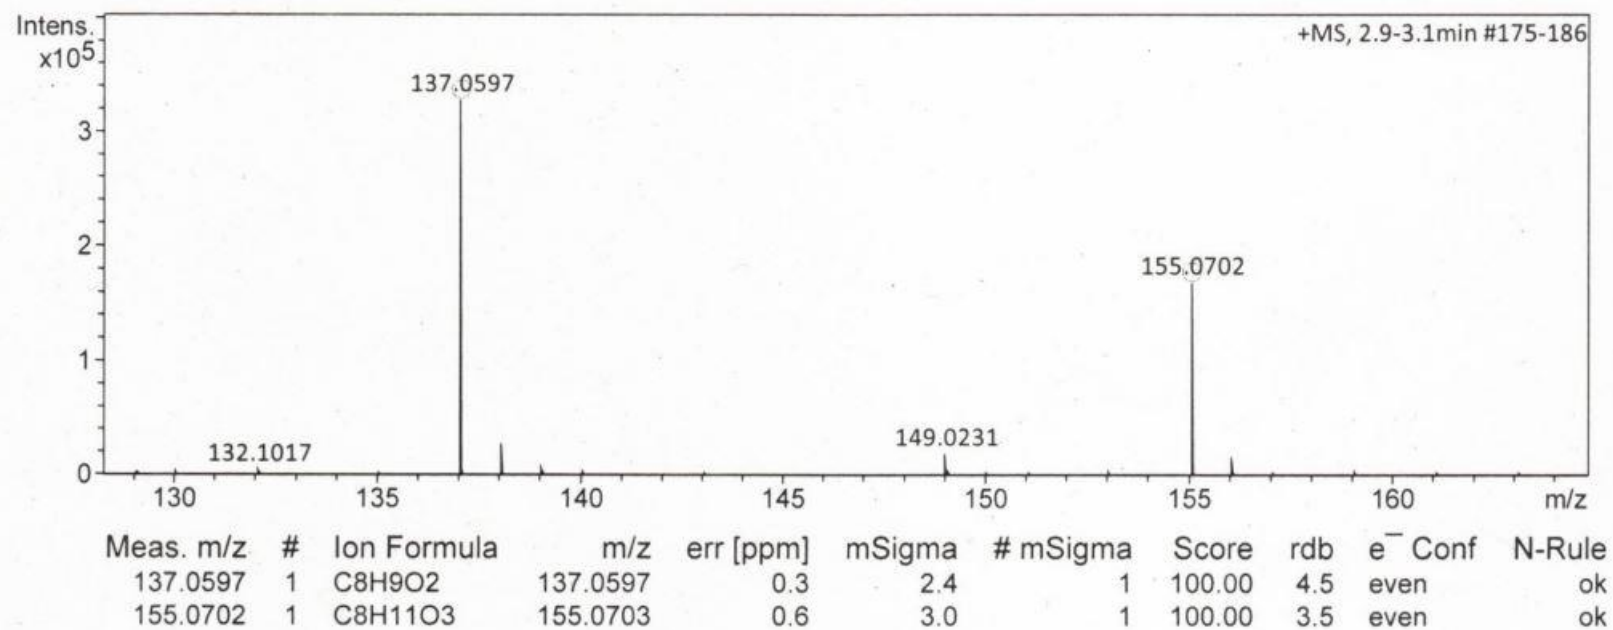

Figure S40. HRESIMS (MeOH) of compound F

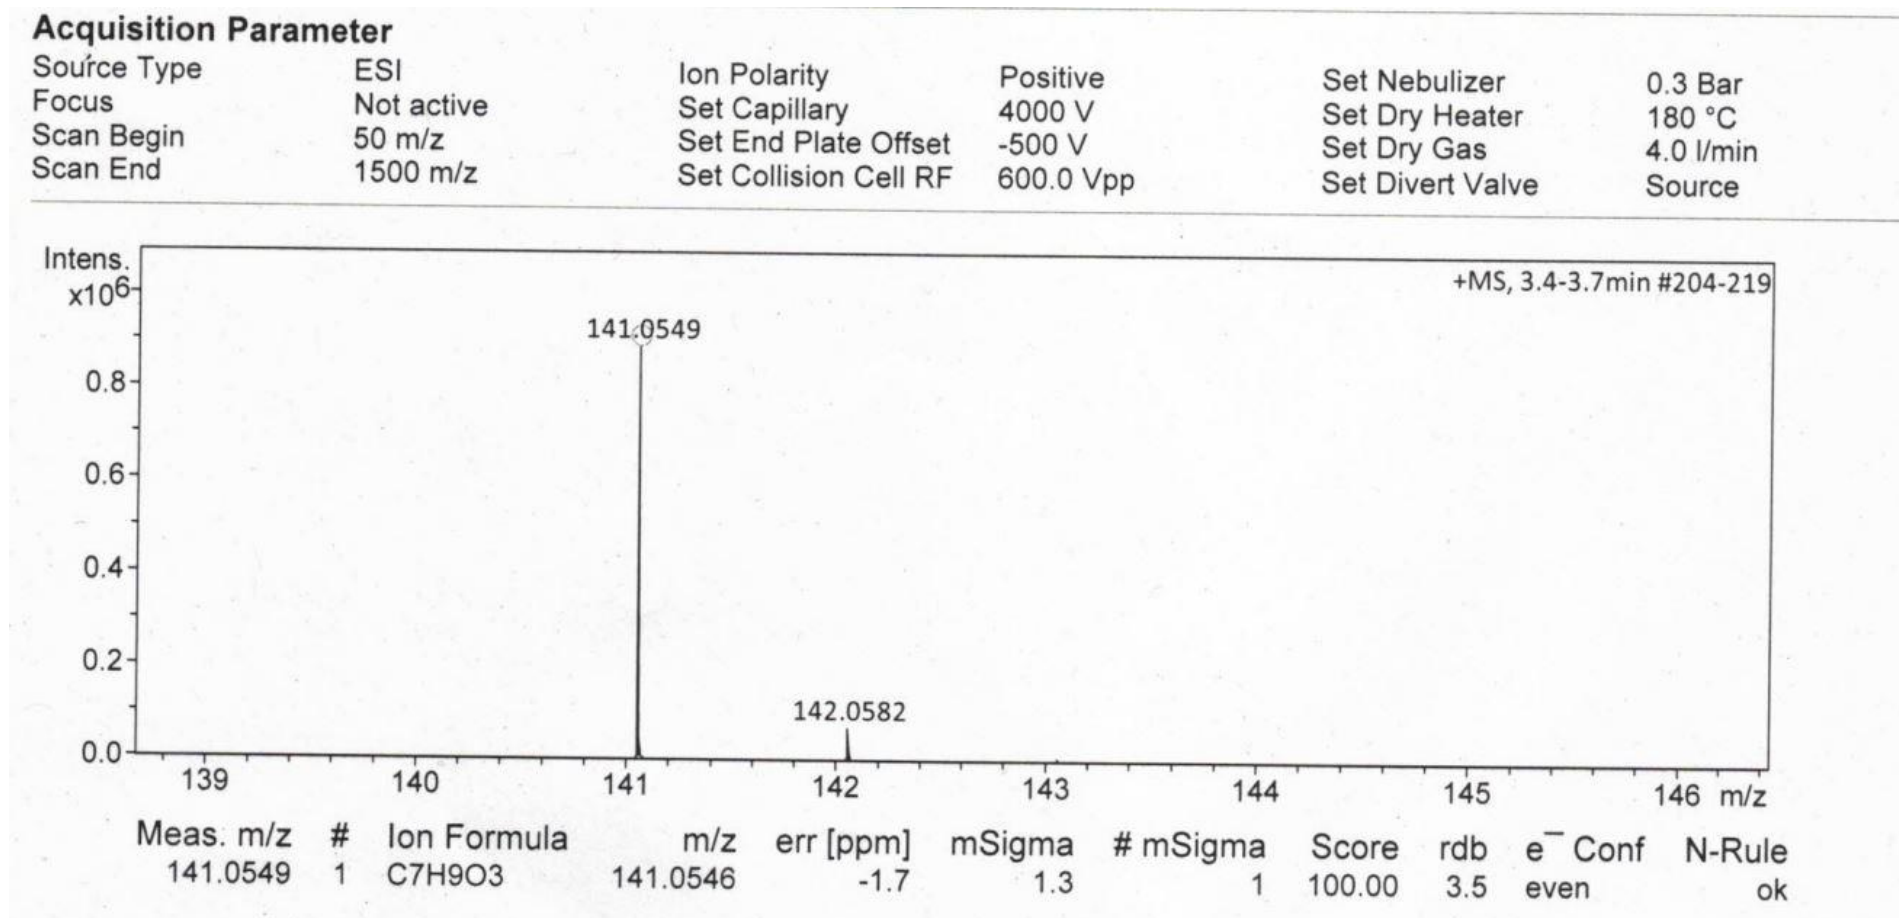

Figure S41. HRESIMS (MeOH) of compound G

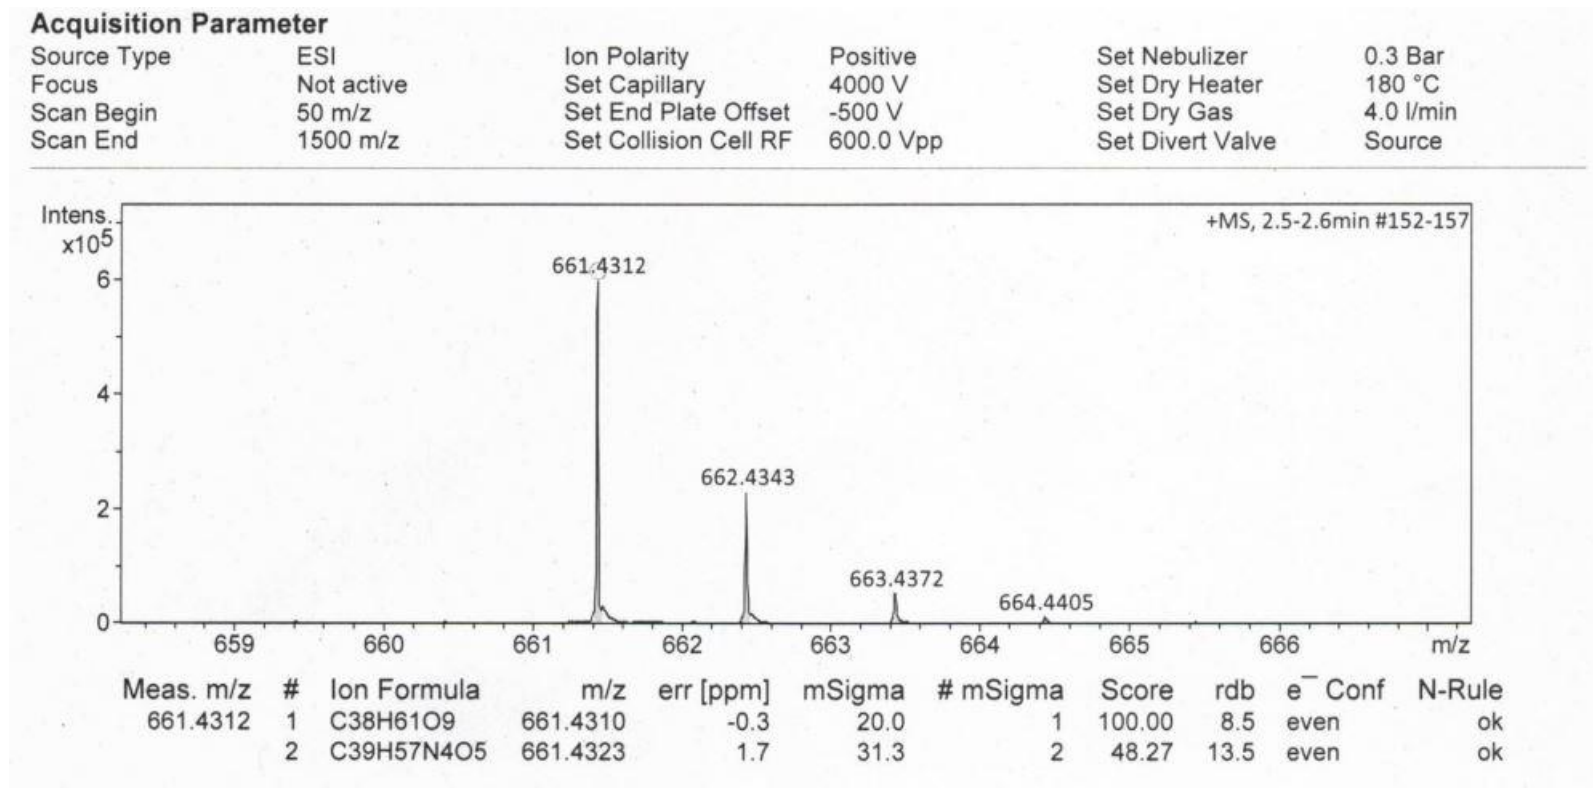

Figure S42. HRESIMS (MeOH) of compound H

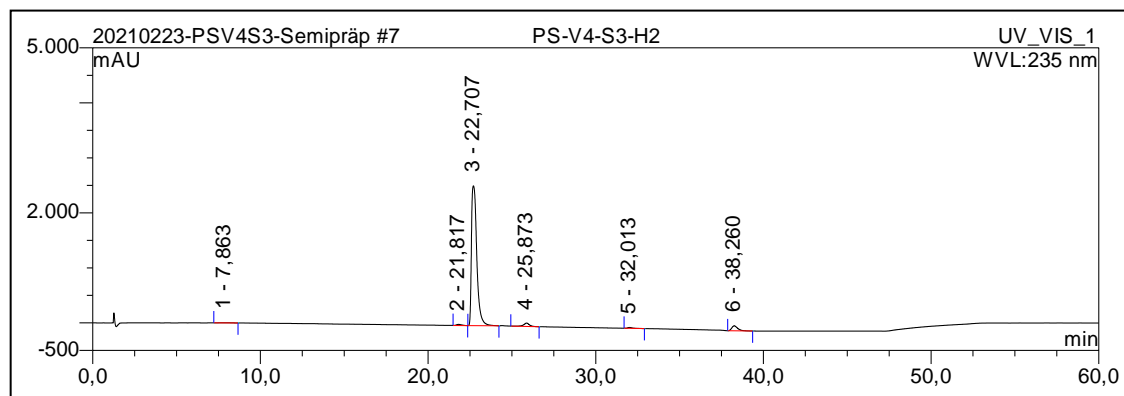

Figure S43. HPLC chromatogram (MeOH) of compound A

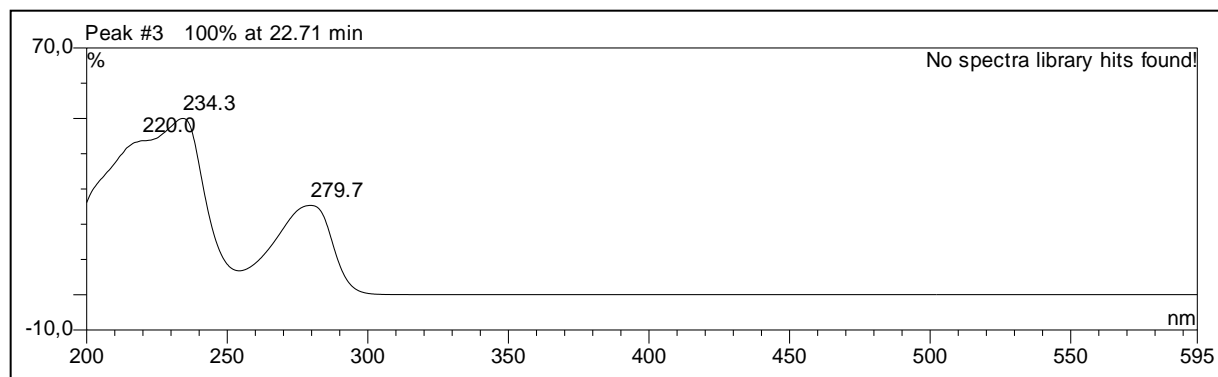

Figure S44. UV-Vis spectrum (MeOH) of compound A

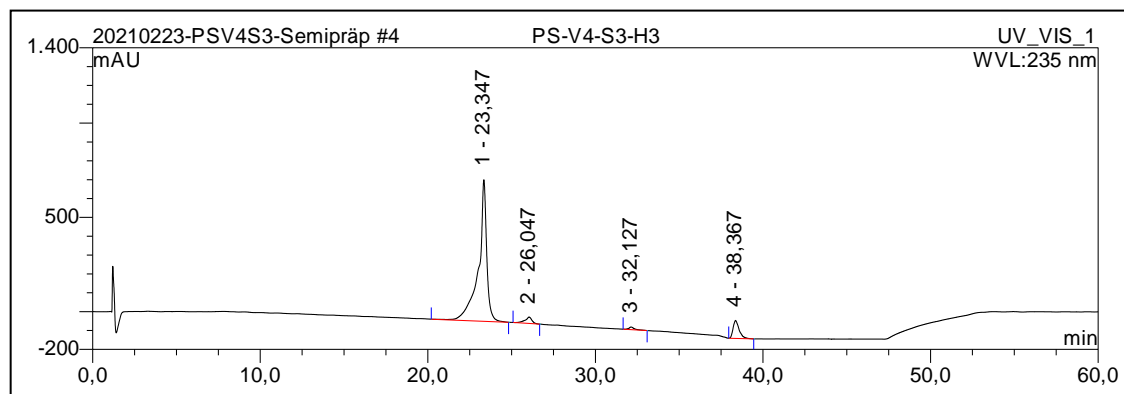

Figure S45. HPLC chromatogram (MeOH) of compound B

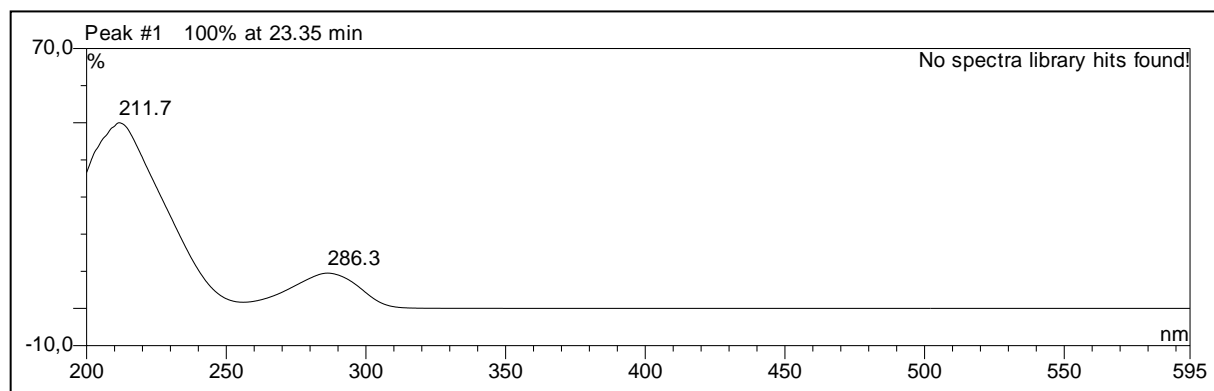

Figure S46. UV-Vis spectrum (MeOH) of compound B

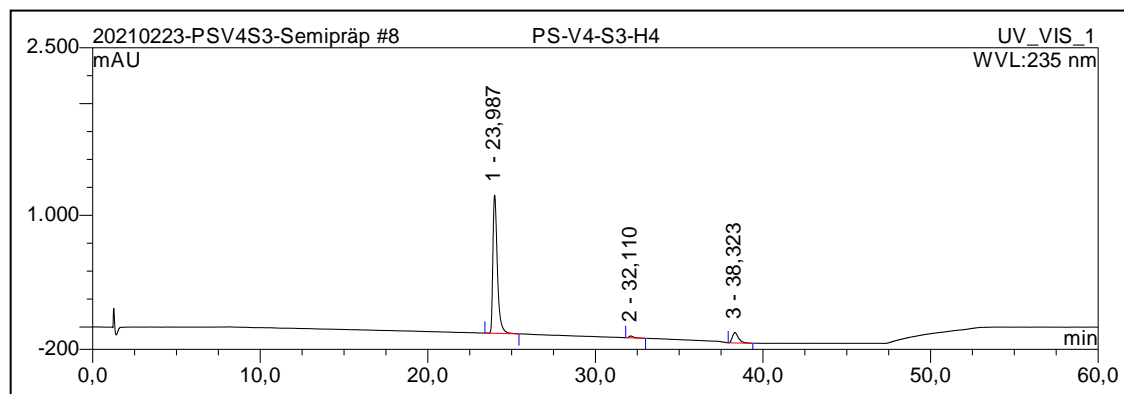

Figure S47. HPLC chromatogram (MeOH) of compound C

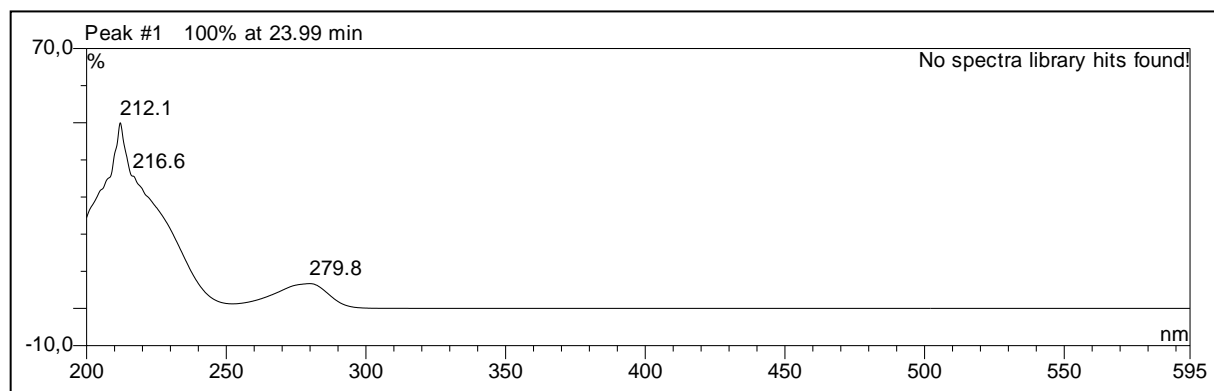

Figure S48. UV-Vis spectrum (MeOH) of compound C



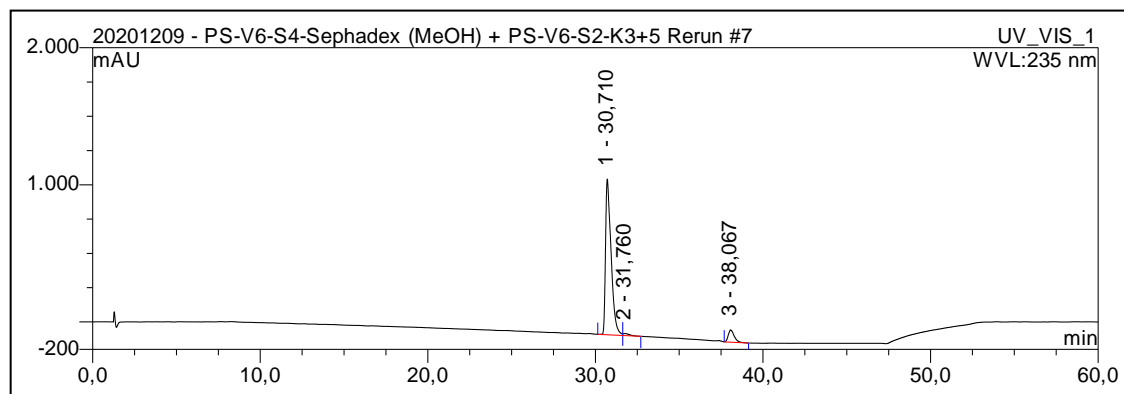

Figure S49. HPLC chromatogram (MeOH) of compound D

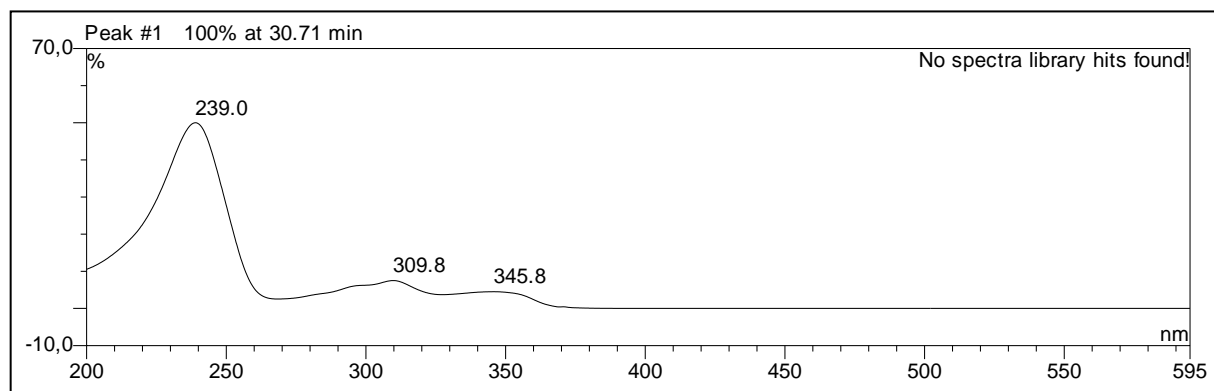

Figure S50. UV-Vis spectrum (MeOH) of compound D

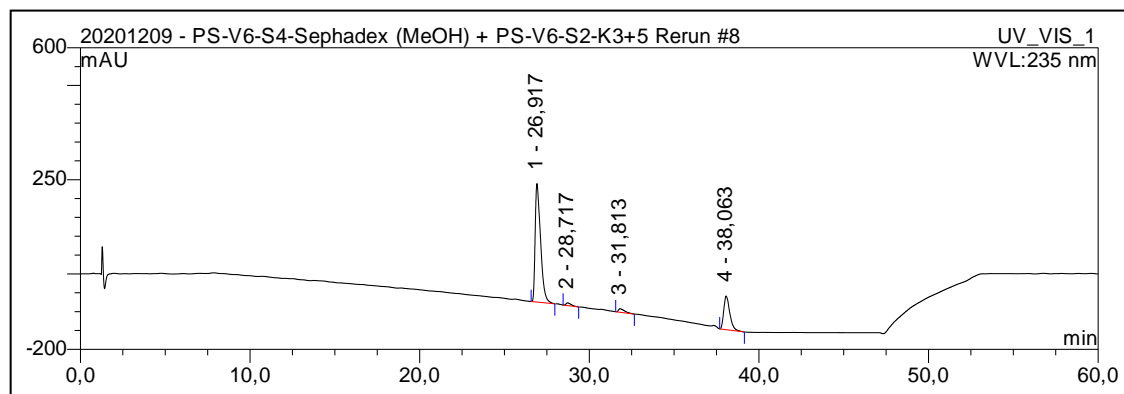

Figure S51. HPLC chromatogram (MeOH) of compound E

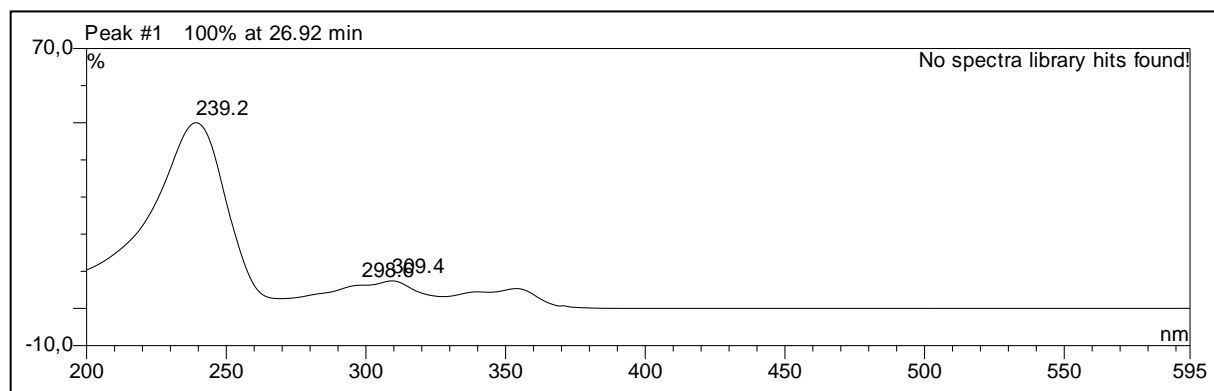

Figure S52. UV-Vis spectrum (MeOH) of compound E

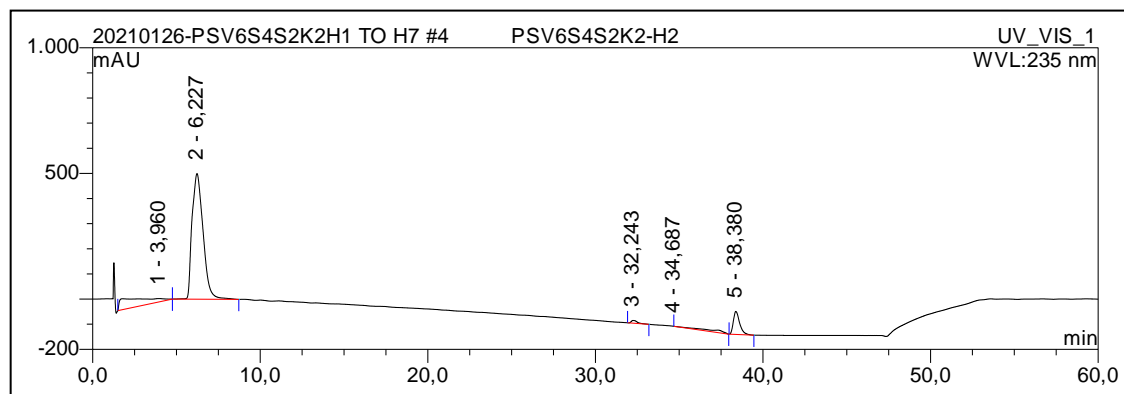

Figure S53. HPLC chromatogram (MeOH) of compound F

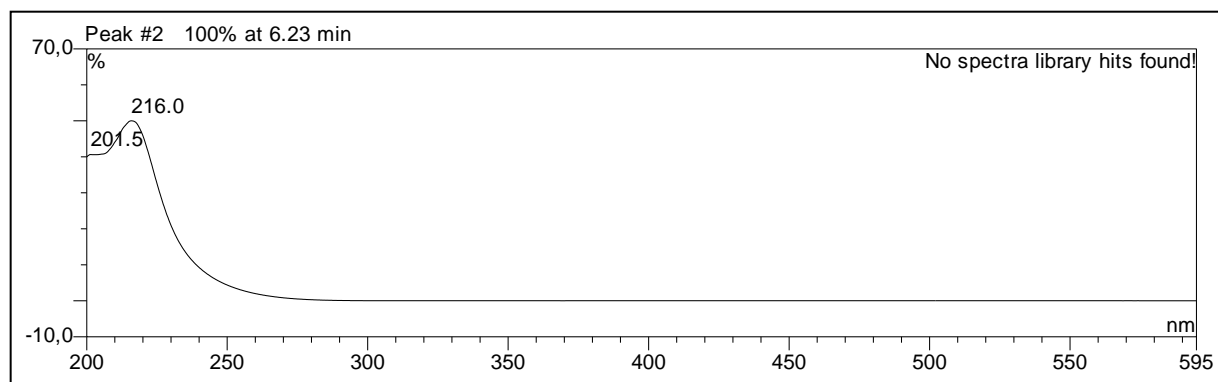

Figure S54. UV-Vis spectrum (MeOH) of compound F

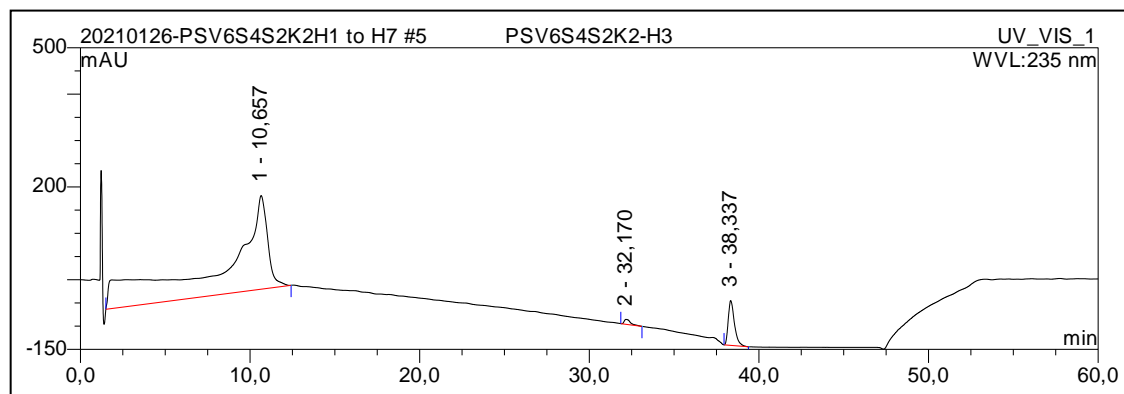

Figure S55. HPLC chromatogram (MeOH) of compound G

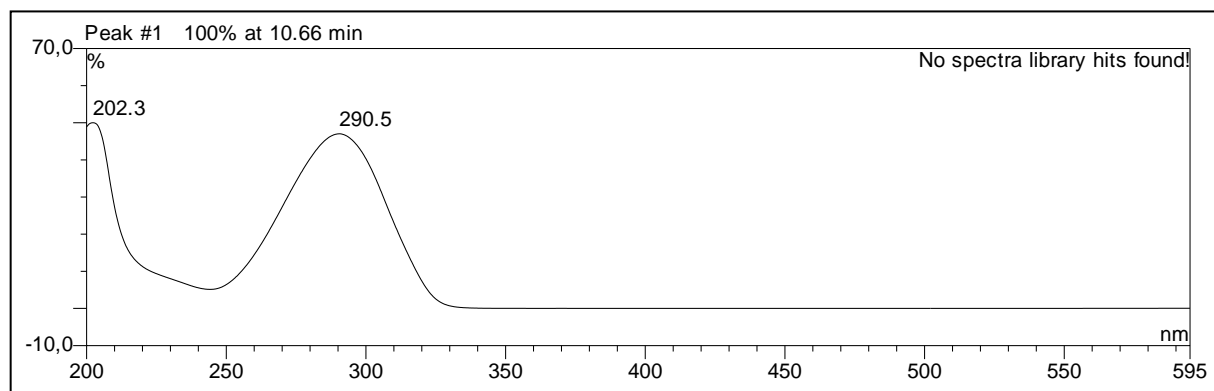

Figure S56. UV-Vis spectrum (MeOH) of compound G

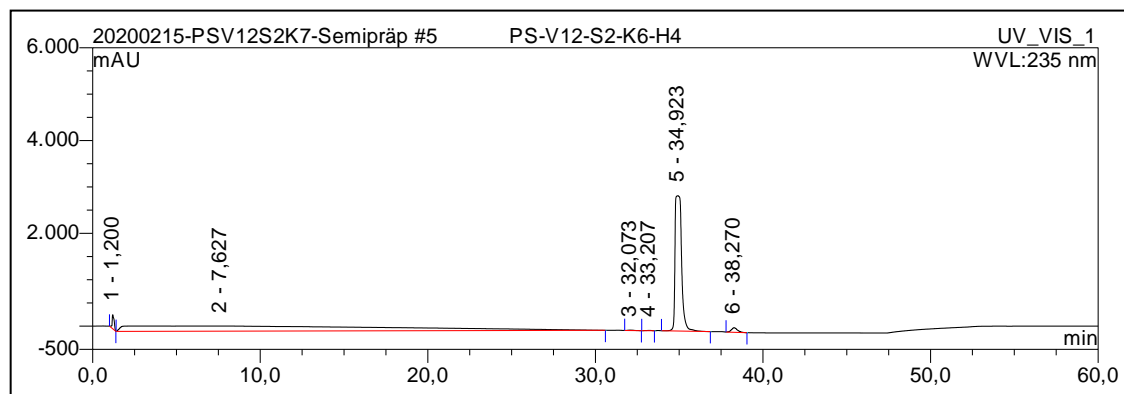

Figure S57- HPLC-chromatogram (MeOH) of compound H

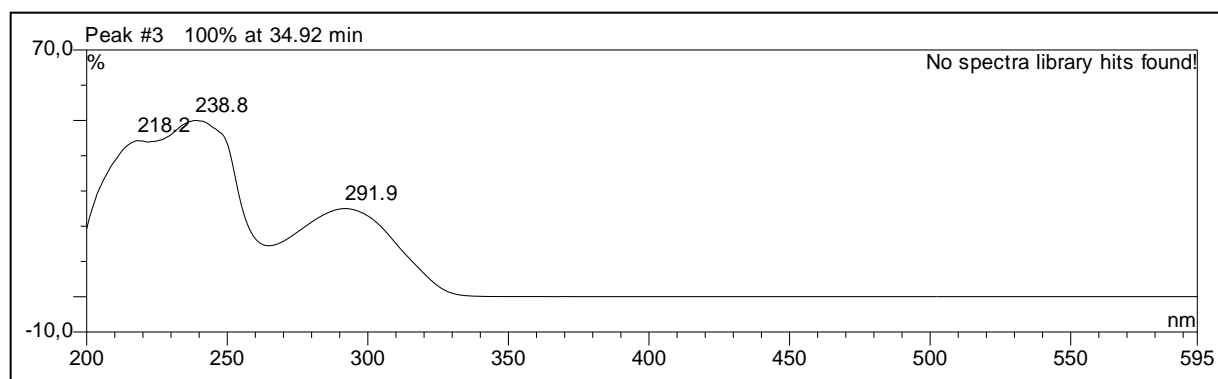

Figure S58. UV-Vis spectrum (MeOH) of compound H

### Stereochemical studies of **F**

The ROESY spectrum of **F** showed correlation between the 5-H and 6-H protons of the adjacent stereogenic centers indicating their *cis* relative configuration. Therefore the conformational analysis and chiroptical calculations were performed on the arbitrarily selected *cis*-(5*S*,6*S*) stereoisomer. The Merck molecular force field (MMFF) conformational search produced 16 conformers in a 21 kJ/mol energy window which were re-optimized at the  $\omega$ B97X/TZVP PCM/MeCN and the B3LYP/TZVP PCM/CHCl<sub>3</sub> levels, separately, yielding 10 and 8 low-energy conformers over 1% Boltzmann population, respectively (Figures S60 and S61). In the low-energy computed conformers, the 5,6-dihydro- $\alpha$ -pyrone moiety adopted a conformation, which oriented the C-5 hydroxyl group to axial and the C-6 prop-1-en-1-yl substituent to equatorial position. ECD spectra computed at four levels for the  $\omega$ B97X conformers gave acceptable agreement with the experimental ECD spectrum (Figure S59) with CAM-B3LYP/TZVP giving the best agreement. Optical rotation calculations performed for the same conformers at four levels and PCM solvent model for EtOH reproduced the large experimental positive value  $\{[\alpha]^{24D} +172\}$  in the range of +81 – +99 (Table S1). VCD spectra computed at the B3LYP/TZVP PCM/CHCl<sub>3</sub> level for the same level optimized conformers gave good agreement with the experimental VCD spectrum (Figure X3). That is, all three applied chiroptical methods suggested (5*S*,6*S*) absolute configuration for **F** allowing elucidation of the absolute configuration as (5*S*,6*S*).

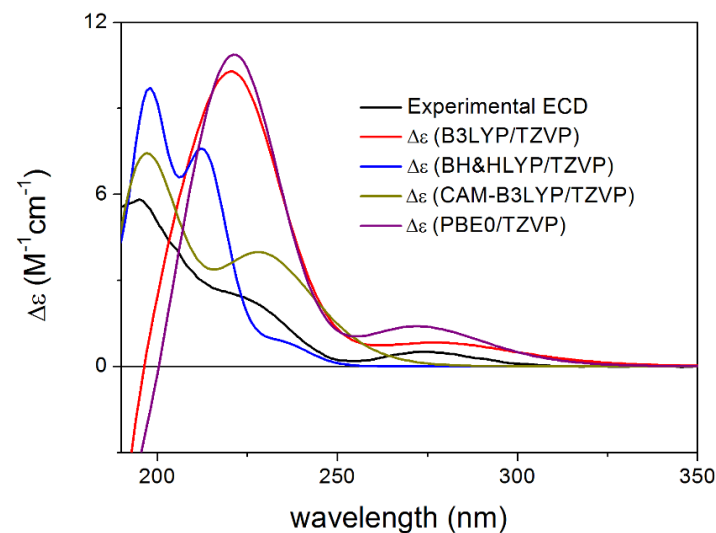

**Figure S59.** Comparison of the experimental ECD spectrum of **F** measured in MeCN and the calculated ECD spectra of (5*S*,6*S*)-**F** computed at various levels of theory for the 10 lowest-energy  $\omega$ B97X/TZVP PCM/MeCN conformers. Black: experimental, red: B3LYP/TZVP PCM/MeCN with half-height width 4200 cm<sup>-1</sup>, blue:

BH&HLYP/TZVP PCM/MeCN with half-height width 2100  $\text{cm}^{-1}$ , olive: CAM-B3LYP/TZVP PCM/MeCN with half-height width 4200  $\text{cm}^{-1}$ , purple: PBE0/TZVP PCM/MeCN with half-height width 4200  $\text{cm}^{-1}$ .

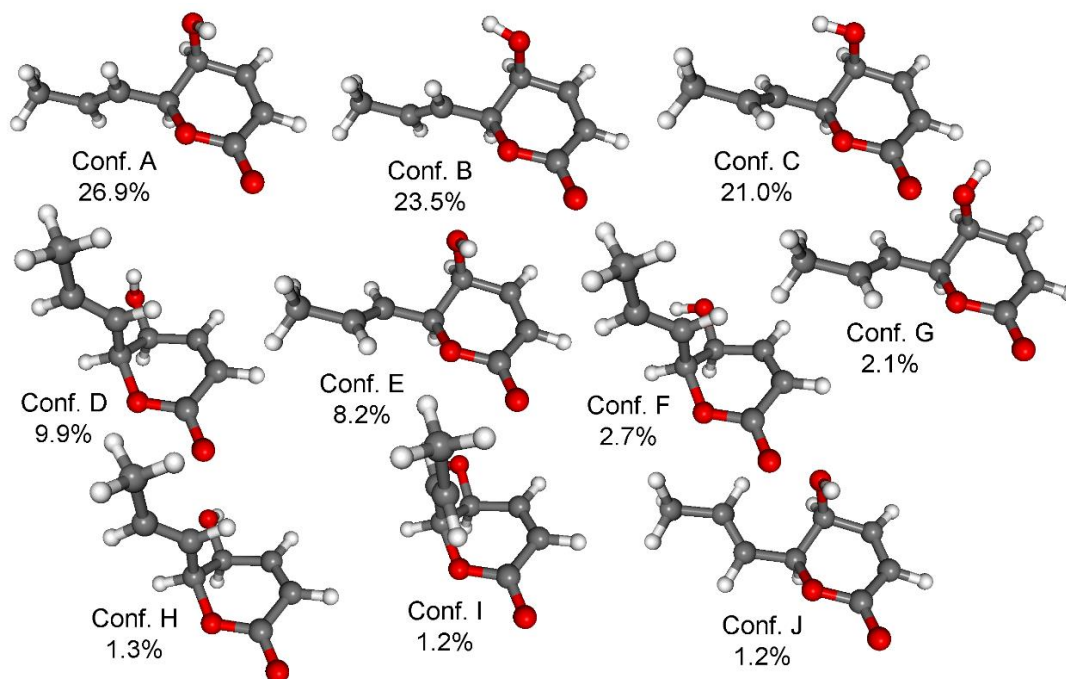

**Figure S60.** Geometries of the low-energy  $\omega$ B97X/TZVP PCM/MeCN conformers of (5S,6S)-F.

**Table S1.** Boltzmann populations and specific optical rotations of the low-energy conformers of (5S,6S)-F computed at various levels for the low-energy  $\omega$ B97X conformers.

| Conformer | Boltzmann population | B3LYP/TZVP<br>PCM/EtOH | BH&HLYP/TZVP<br>PCM/EtOH | CAM-B3LYP/TZVP<br>PCM/EtOH | PBE0/TZVP<br>PCM/EtOH |
|-----------|----------------------|------------------------|--------------------------|----------------------------|-----------------------|
| Conf. A   | 26.93%               | 134.70                 | 98.20                    | 104.21                     | 130.74                |
| Conf. B   | 23.55%               | 29.58                  | 5.44                     | 9.46                       | 29.68                 |
| Conf. C   | 20.95%               | 214.32                 | 199.47                   | 197.39                     | 211.76                |

|         |       |         |        |         |         |
|---------|-------|---------|--------|---------|---------|
| Conf. D | 9.90% | -104.45 | -80.52 | -97.75  | -93.21  |
| Conf. E | 8.24% | 211.30  | 192.34 | 193.43  | 209.37  |
| Conf. F | 2.73% | -128.11 | -87.40 | -111.23 | -111.39 |
| Conf. G | 2.09% | 228.43  | 189.15 | 199.16  | 223.73  |
| Conf. H | 1.32% | -56.67  | -26.86 | -45.34  | -45.81  |
| Conf. I | 1.24% | -155.48 | -96.97 | -122.07 | -146.94 |
| Conf. J | 1.19% | 263.77  | 211.06 | 223.80  | 260.09  |
| Average | N/A   | 98.79   | 81.43  | 81.10   | 98.73   |

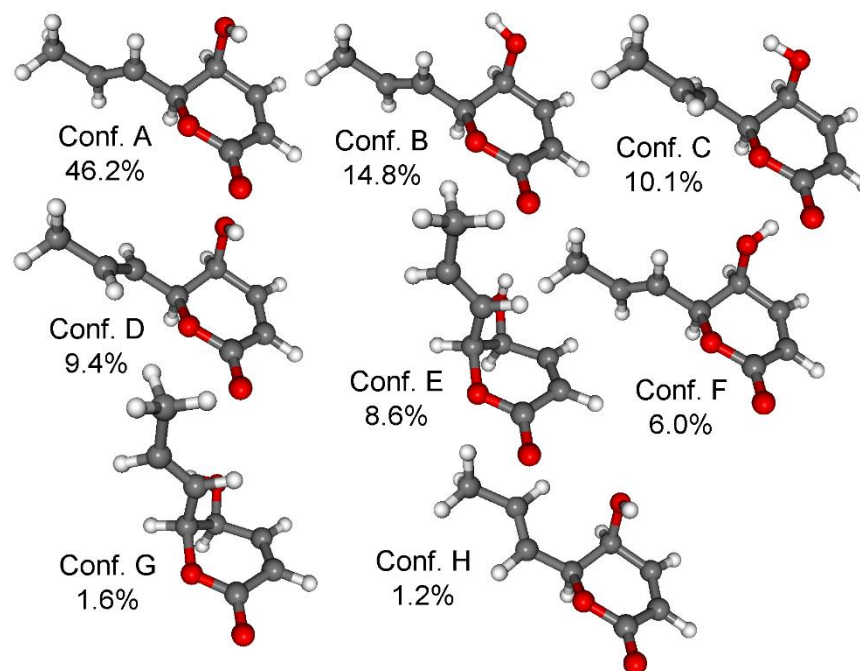

**Figure S61.** Geometries of the low-energy B3LYP/TZVP PCM/CHCl<sub>3</sub> conformers of (5*S*,6*S*)-F.



## Computational details

Mixed torsional/low-frequency mode conformational searches were carried out by means of the MacroModel 10.8.011 software by using the MMFF with an implicit solvent model for  $\text{CHCl}_3$  [1]. Geometry re-optimizations were carried out at the  $\omega\text{B97X/TZVP}$  level with the PCM solvent model for MeCN and the B3LYP/TZVP level with PCM solvent model for  $\text{CHCl}_3$ . TDDFT-ECD and OR calculations were run with various functionals (B3LYP, BH&HLYP, CAMB3LYP, and PBE0) and the TZVP basis set as implemented in the Gaussian 09 package with the PCM/MeCN and the PCM/EtOH solvent models, respectively [2]. ECD spectra were generated as sums of Gaussians with  $2100\text{--}4200\text{ cm}^{-1}$  width at half-height, using dipole-velocity-computed rotational strength values [3]. VCD spectra were generated with  $8\text{ cm}^{-1}$  half-height width and scaled by a factor of 0.99. Boltzmann distributions were estimated from the  $\omega\text{B97X}$  and the B3LYP energies. The Molekel software package was used for visualization of the results [4].

## References

- [1] MacroModel; Schrödinger LLC, 2015, <http://www.schrodinger.com/MacroModel>.
- [2] Frisch, M. J.; Trucks, G. W.; Schlegel, H. B.; Scuseria, G. E.; Robb, M. A.; Cheeseman, J. R.; Scalmani, V.; Barone, G.; Mennucci, B.; Petersson, G. A.; Nakatsuji, H.; Caricato, M.; Li, X.; Hratchian, H. P.; Izmaylov, A. F.; Bloino, J.; Zheng, G.; Sonnenberg, J. L.; Hada, M.; Ehara, M.; Toyota, K.; Fukuda, R.; Hasegawa, J.; Ishida, M.; Nakajima, T.; Honda, Y.; Kitao, O.; Nakai, H.; Vreven, T.; Montgomery, J. A., Jr.; Peralta, J. E.; Ogliaro, F.; Bearpark, M.; Heyd, J. J.; Brothers, E.; Kudin, K. N.; Staroverov, V. N.; Kobayashi, R.; Normand, J.; Raghavachari, K.; Rendell, A.; Burant, J. C.; Iyengar, S. S.; Tomasi, J.; Cossi, M.; Rega, N.; Millam, J. M.; Klene, M.; Knox, J. E.; Cross, J. B.; Bakken, V.; Adamo, C.; Jaramillo, J.; Gomperts, R.; Stratmann, R. E.; Yazyev, O.; Austin, A. J.; Cammi, R.; Pomelli, C.; Ochterski, J. W.; Martin, R. L.; Morokuma, K.; Zakrzewski, V. G.; Voth, G. A.; Salvador, P.; Dannenberg, J. J.; Dapprich, S.; Daniels, A. D.; Farkas, O.; Foresman, J. B.; Ortiz, J. V.; Cioslowski, J.; Fox, D. J. Gaussian 09 (Revision E.01); Gaussian, Inc.: Wallingford, CT, 2013.
- [3] Stephens, P. J.; Harada, N. *Chirality* 2009, 22, 229–233.
- [4] Varetto, U. MOLEKEL 5.4; Swiss National Supercomputing Centre: Manno, Switzerland, 2009.
